# Supplementary material for: The Application of DNA Barcodes for the Identification of Marine Crustaceans from the North Sea and Adjacent Regions
Source: PubMed Central journal article supplement (PMC4587929; doi:10.1371/journal.pone.0139421), 2015-09-29
Supplement: pone.0139421.s002.pdf [file pone.0139421.s002.pdf]

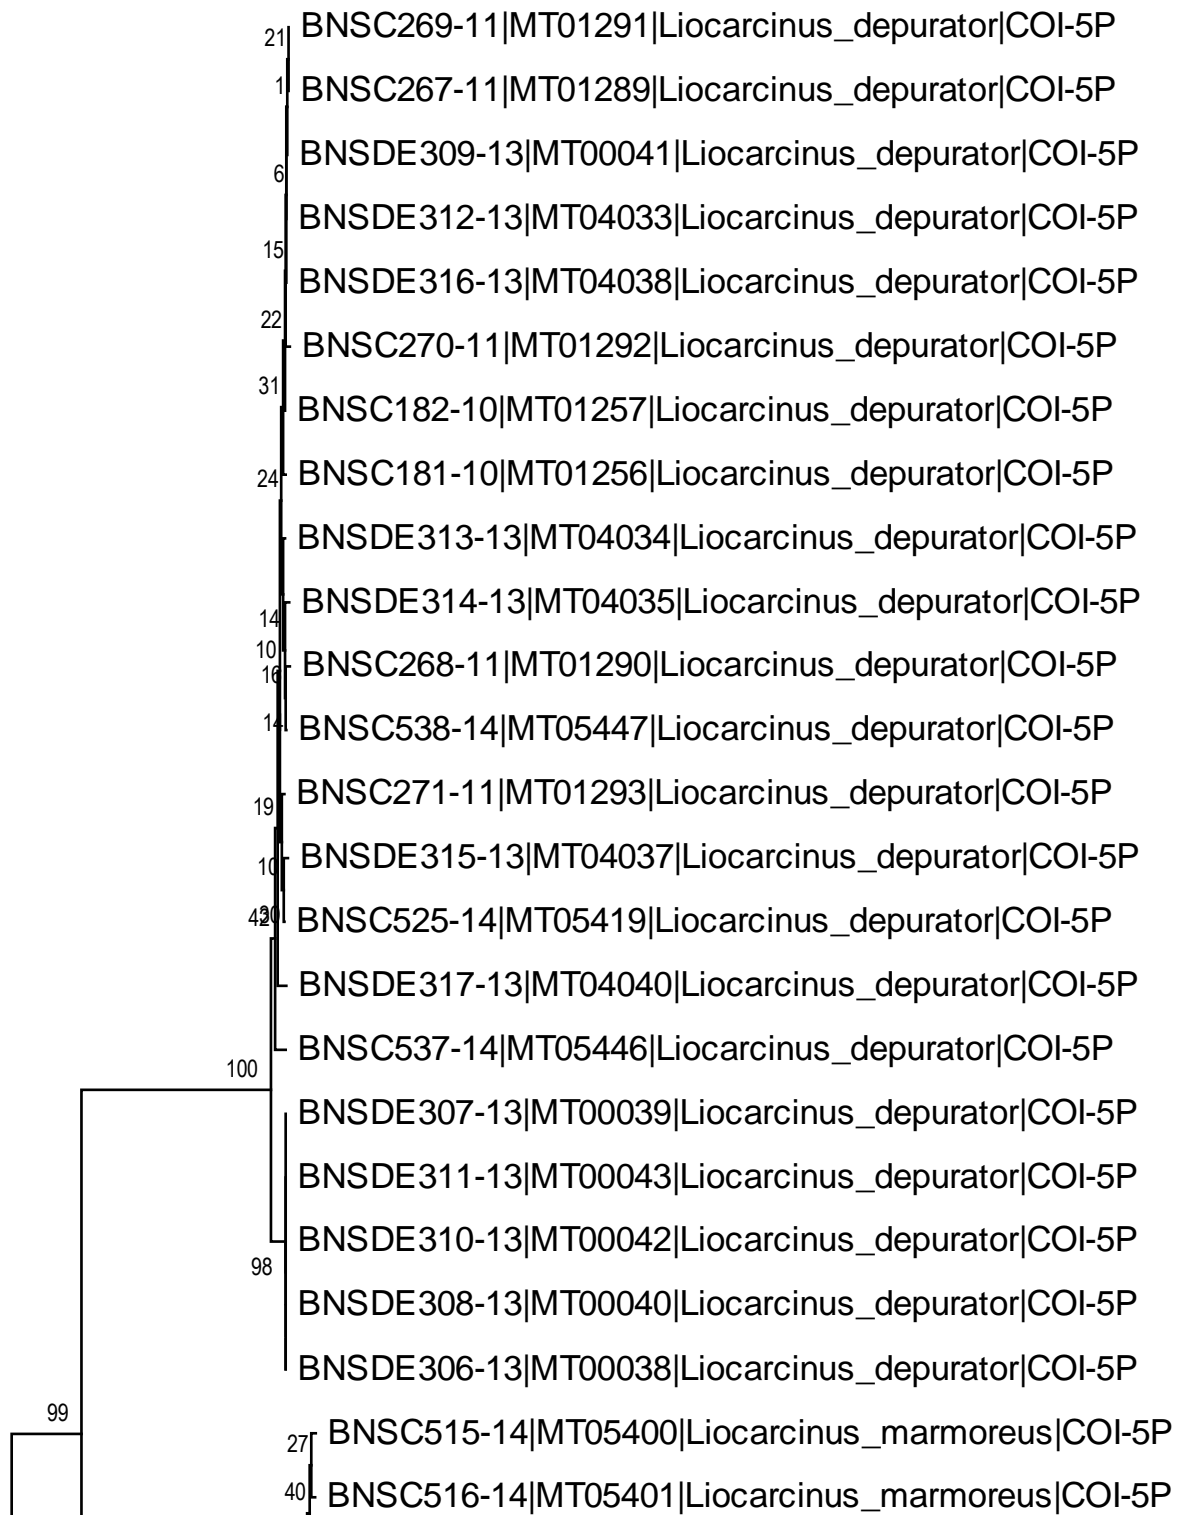

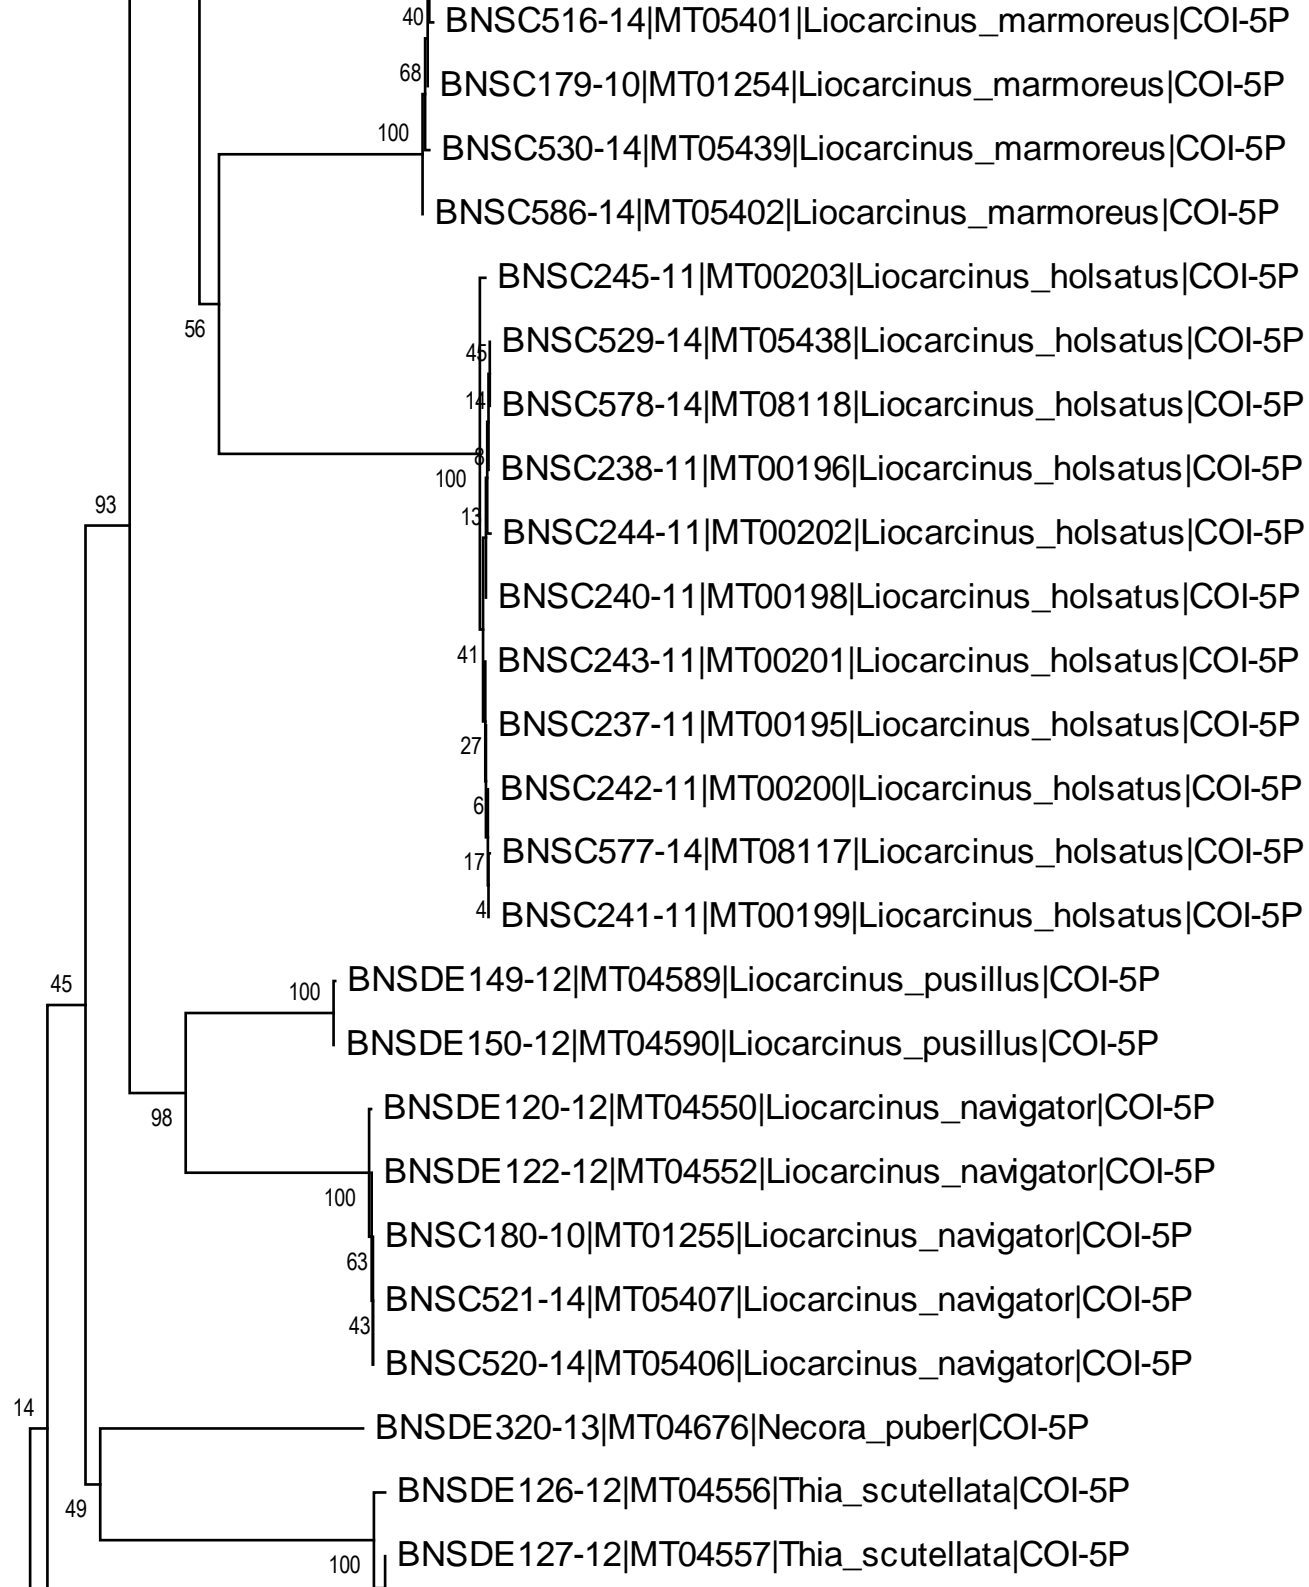

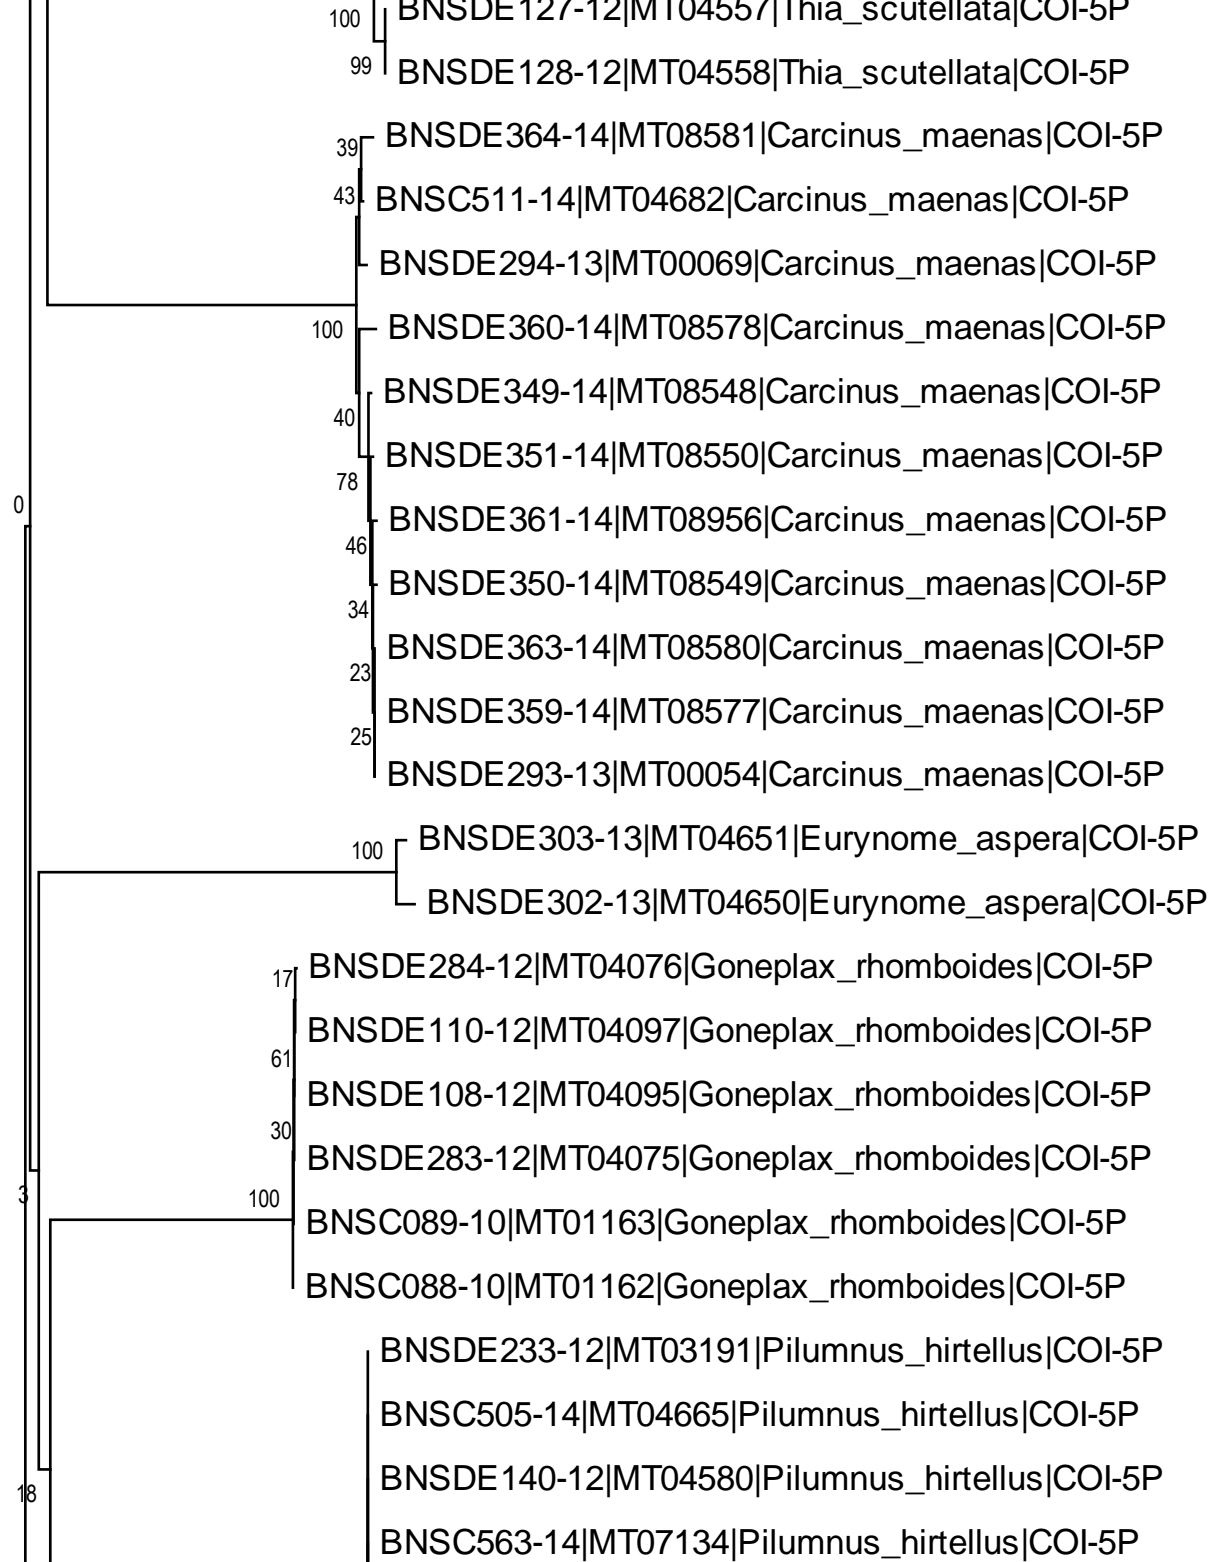

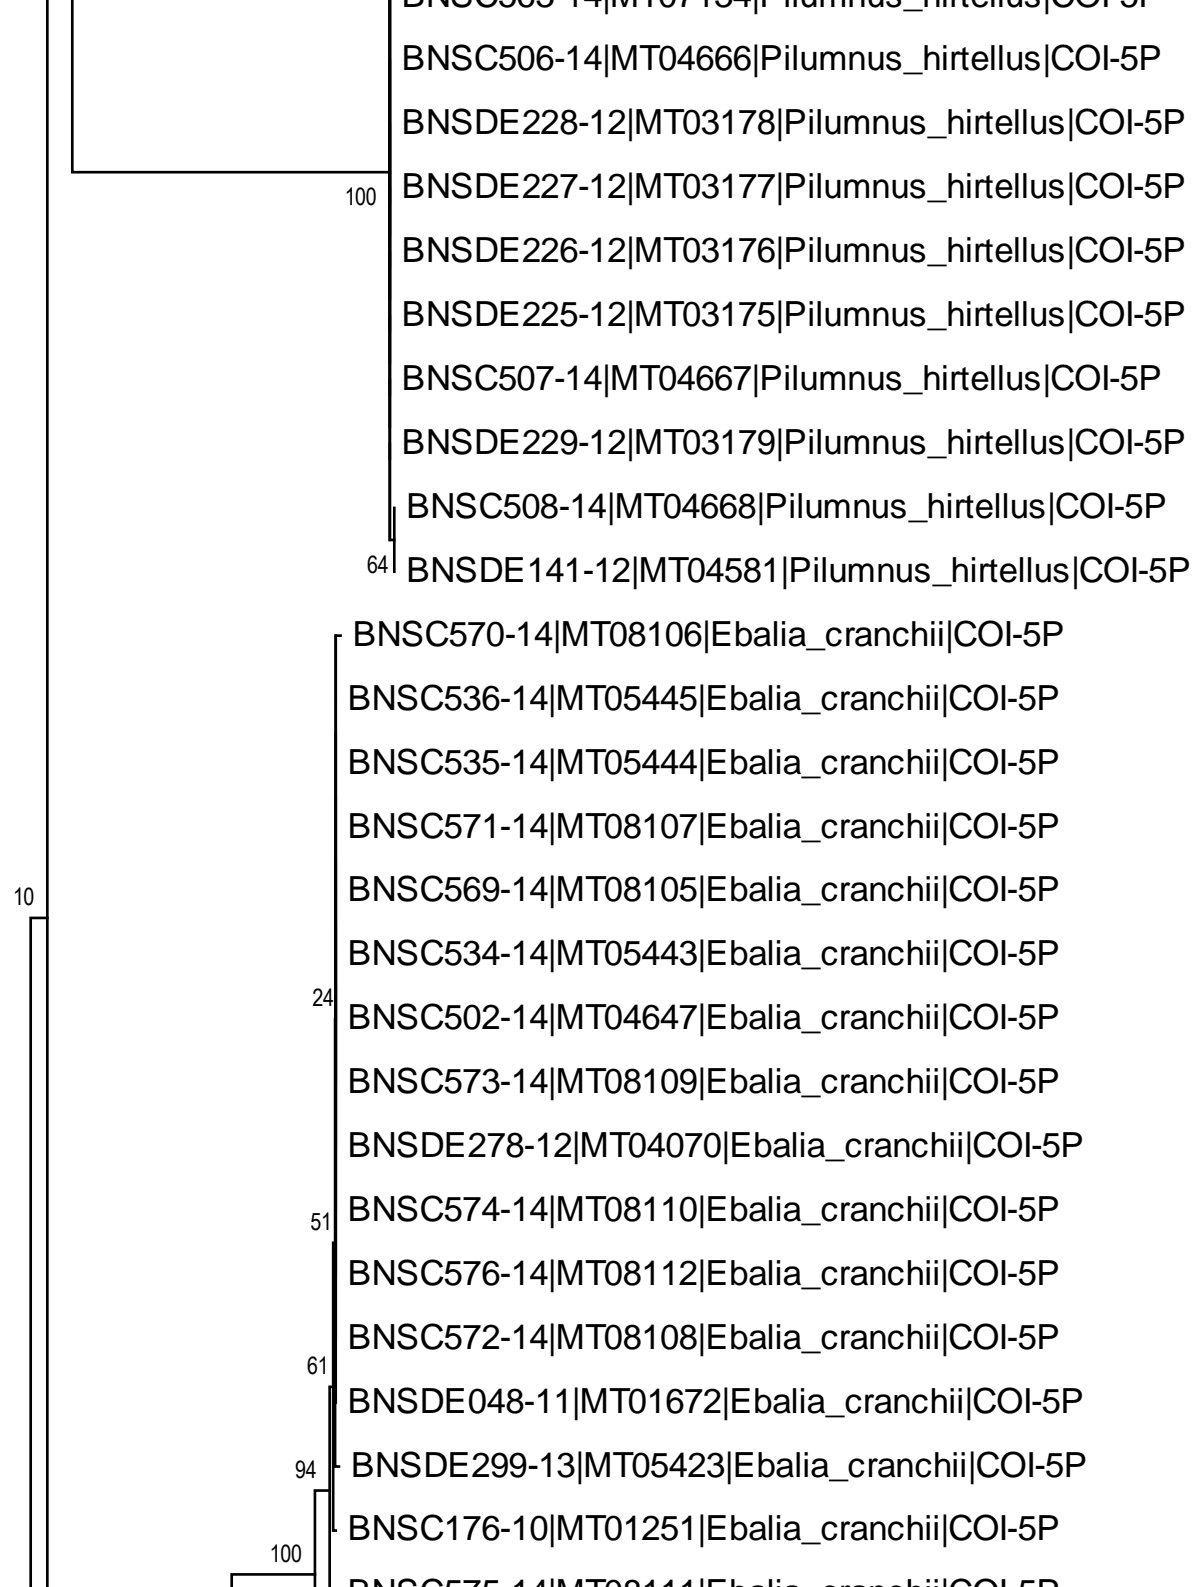

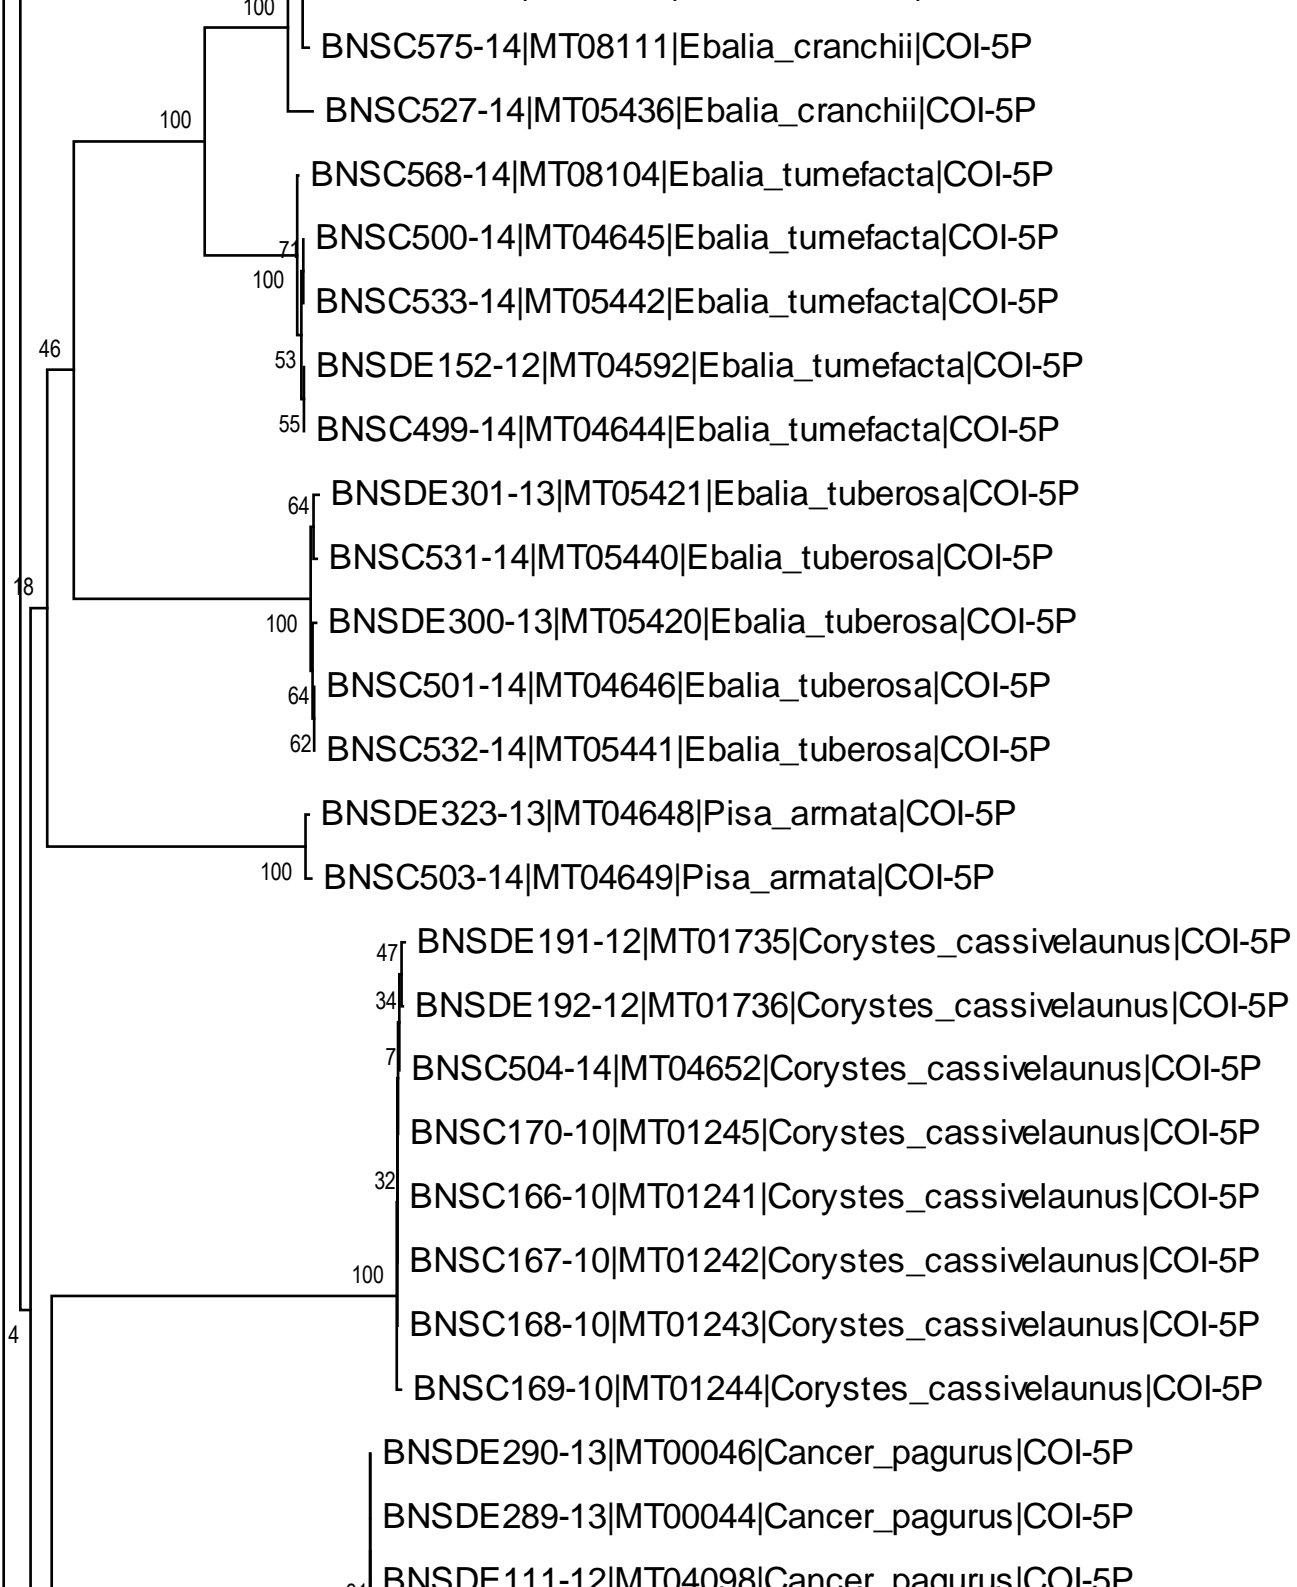

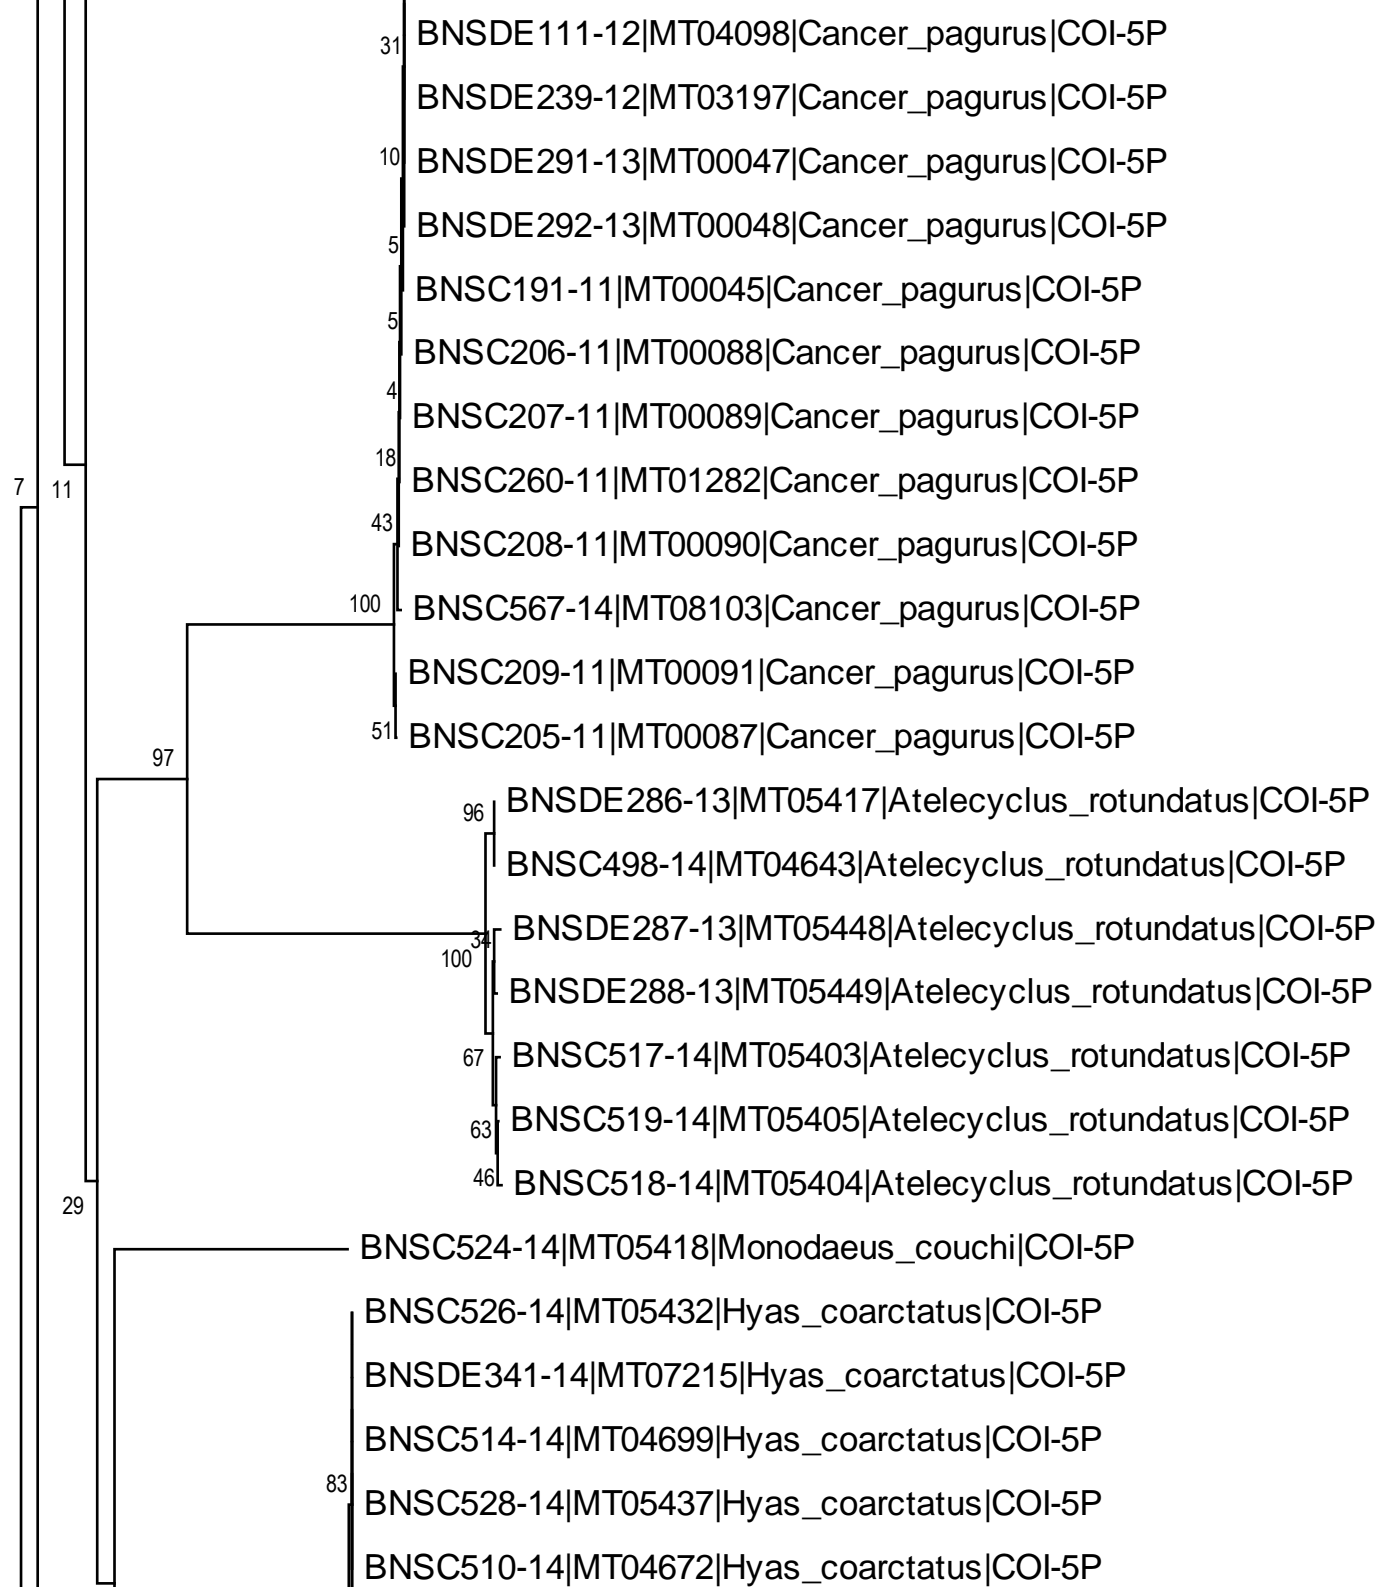

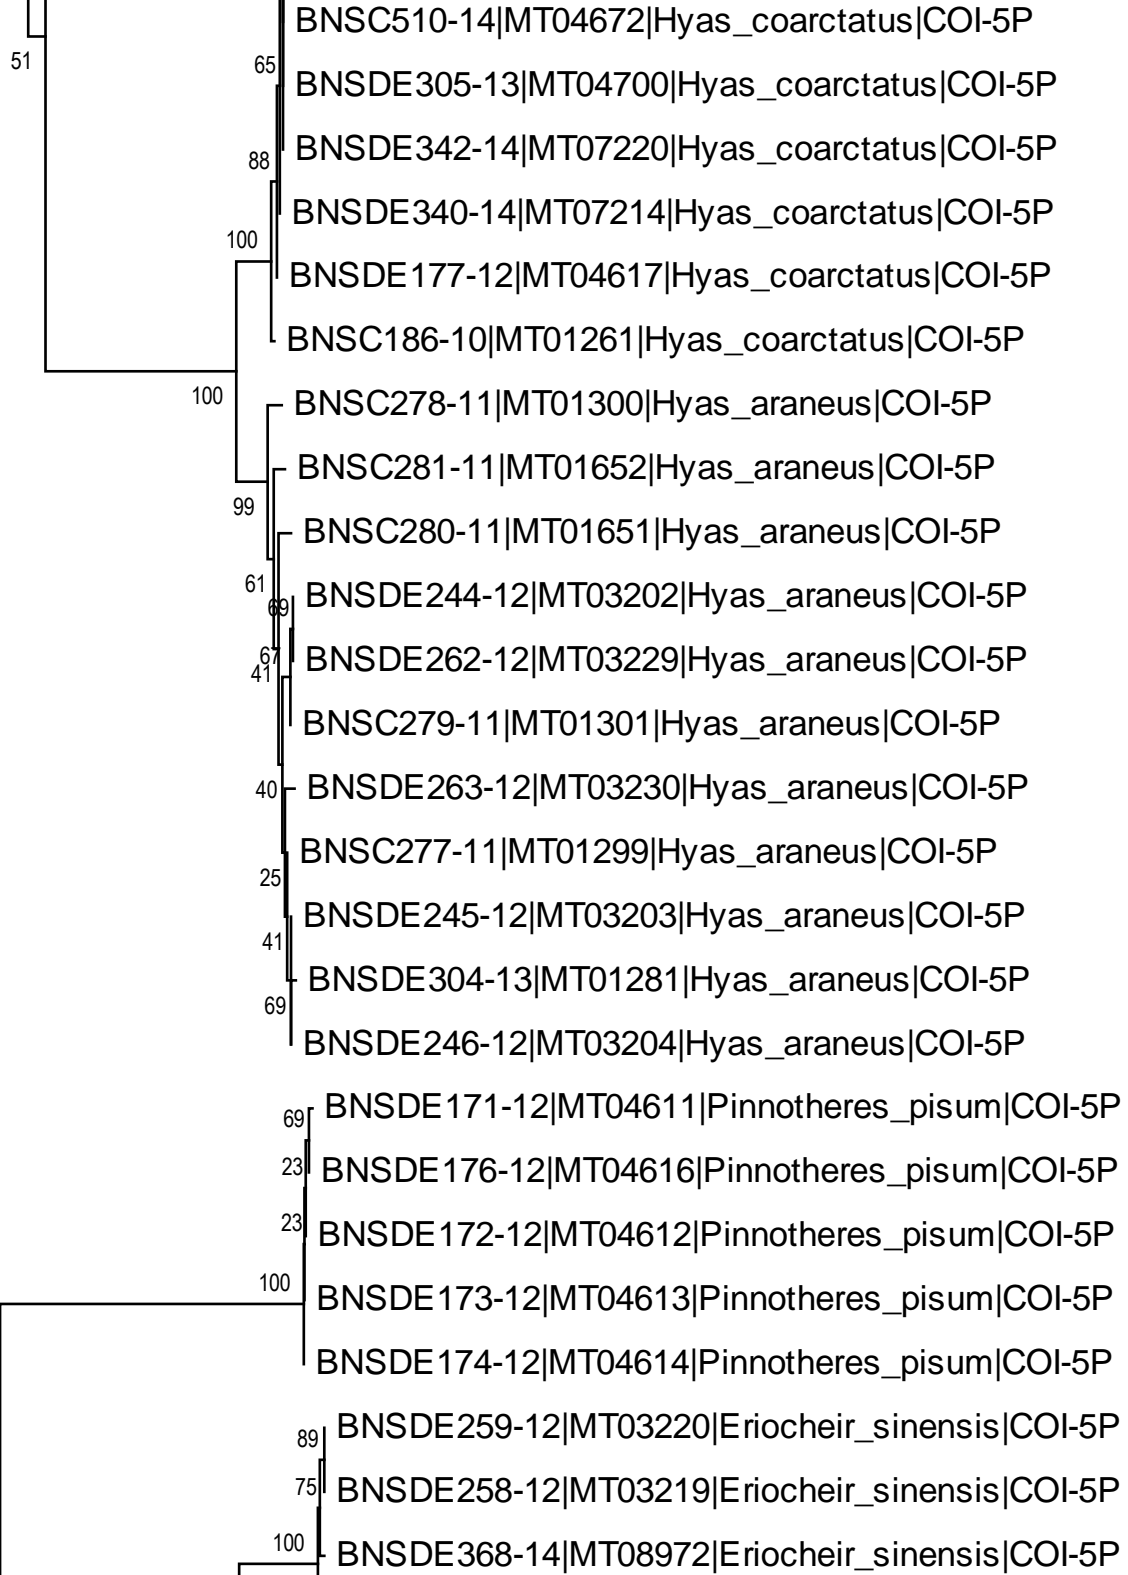

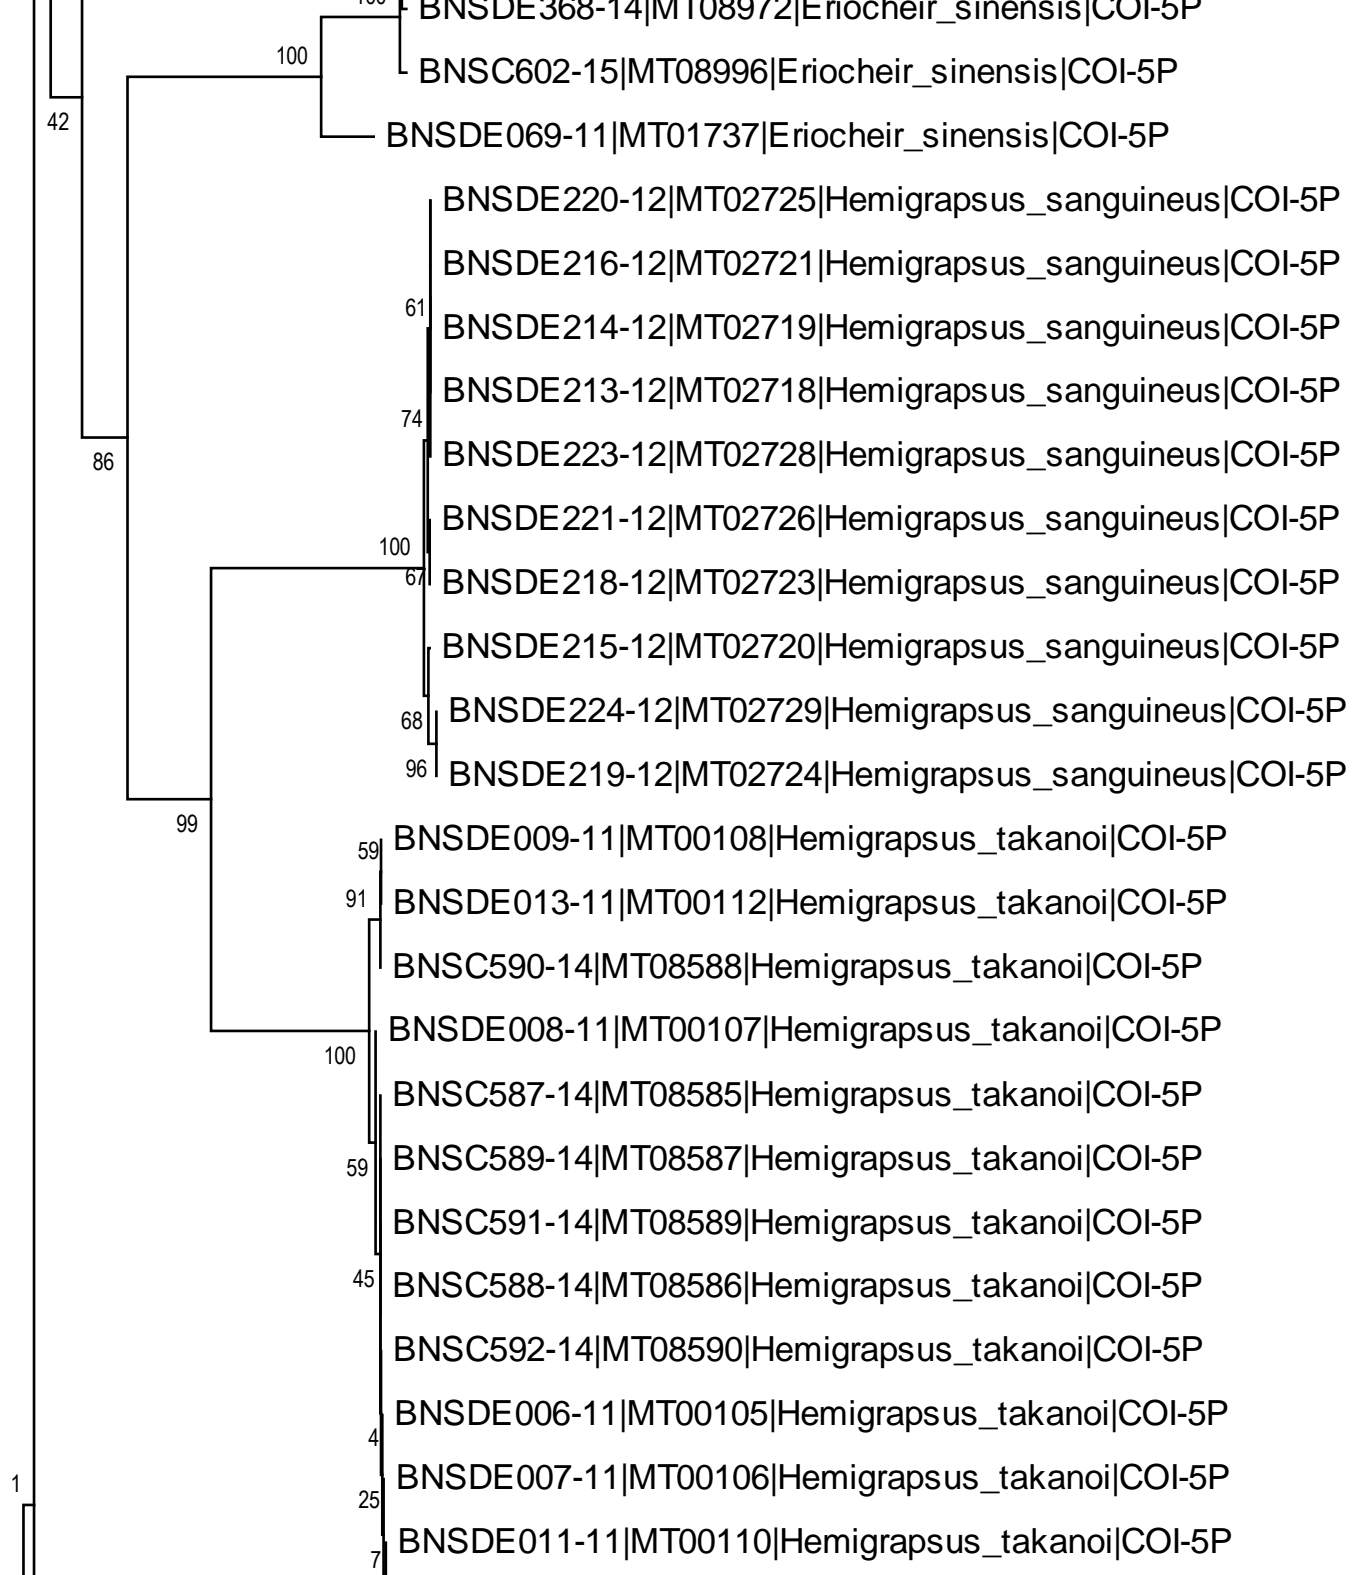



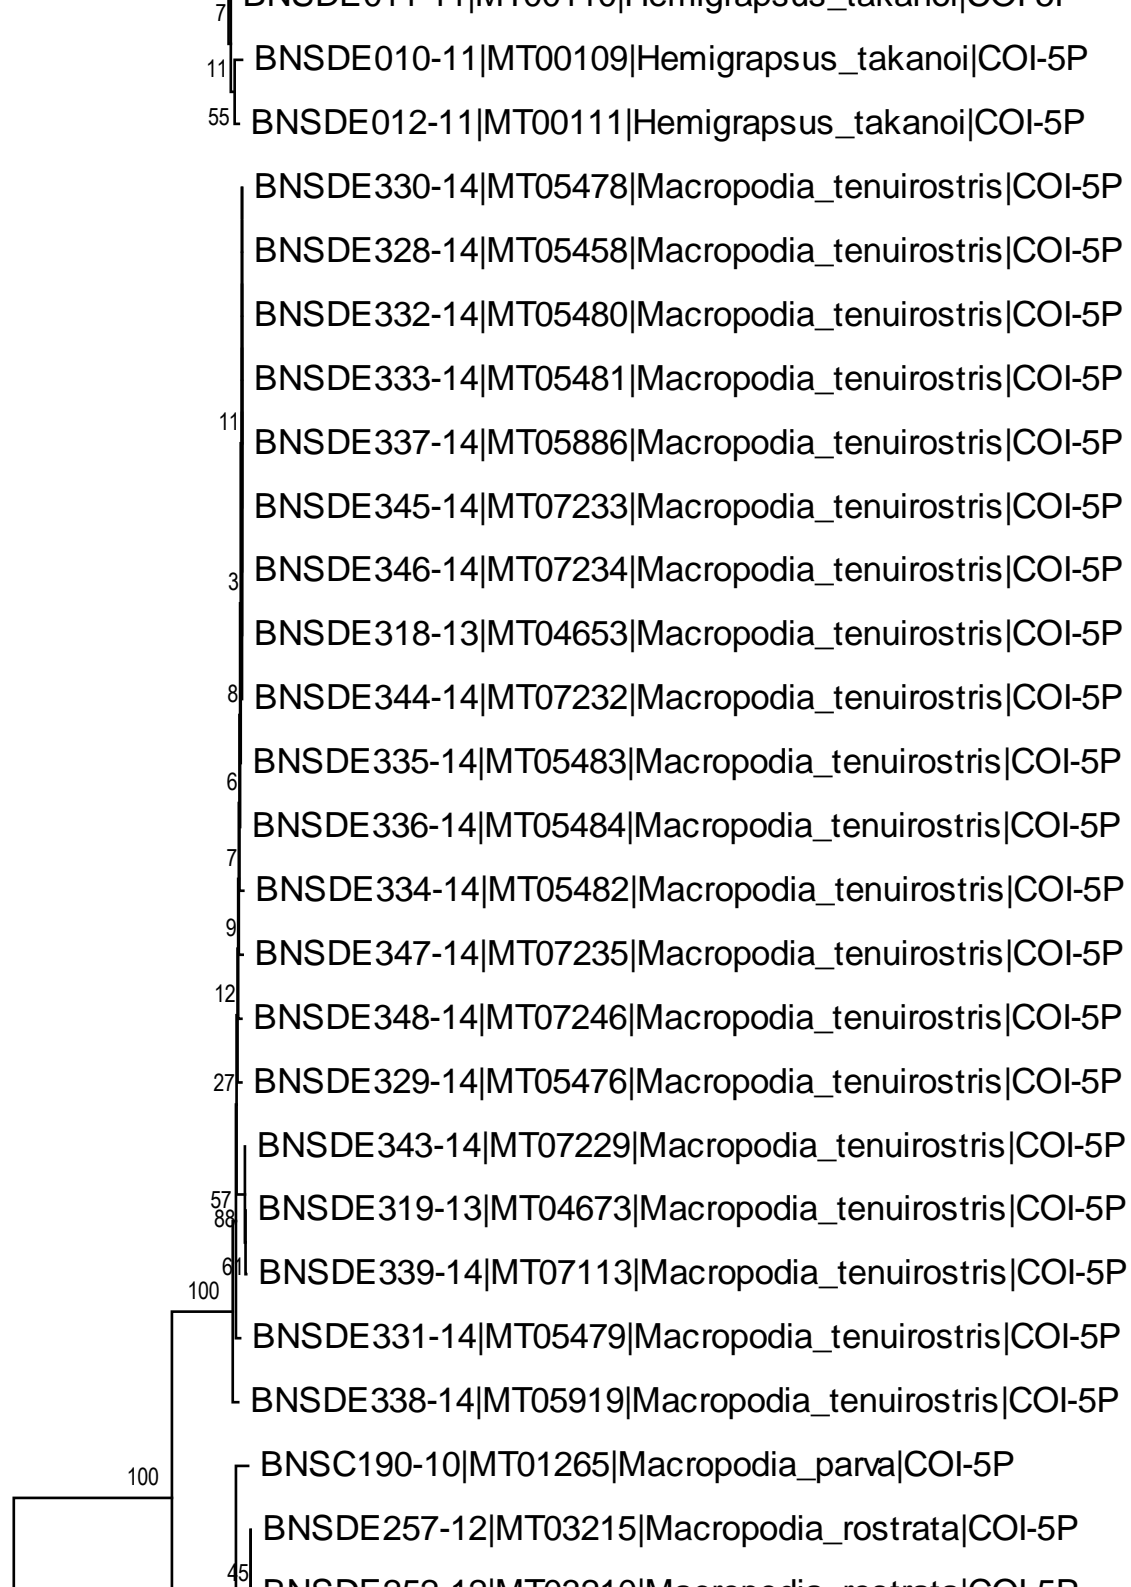

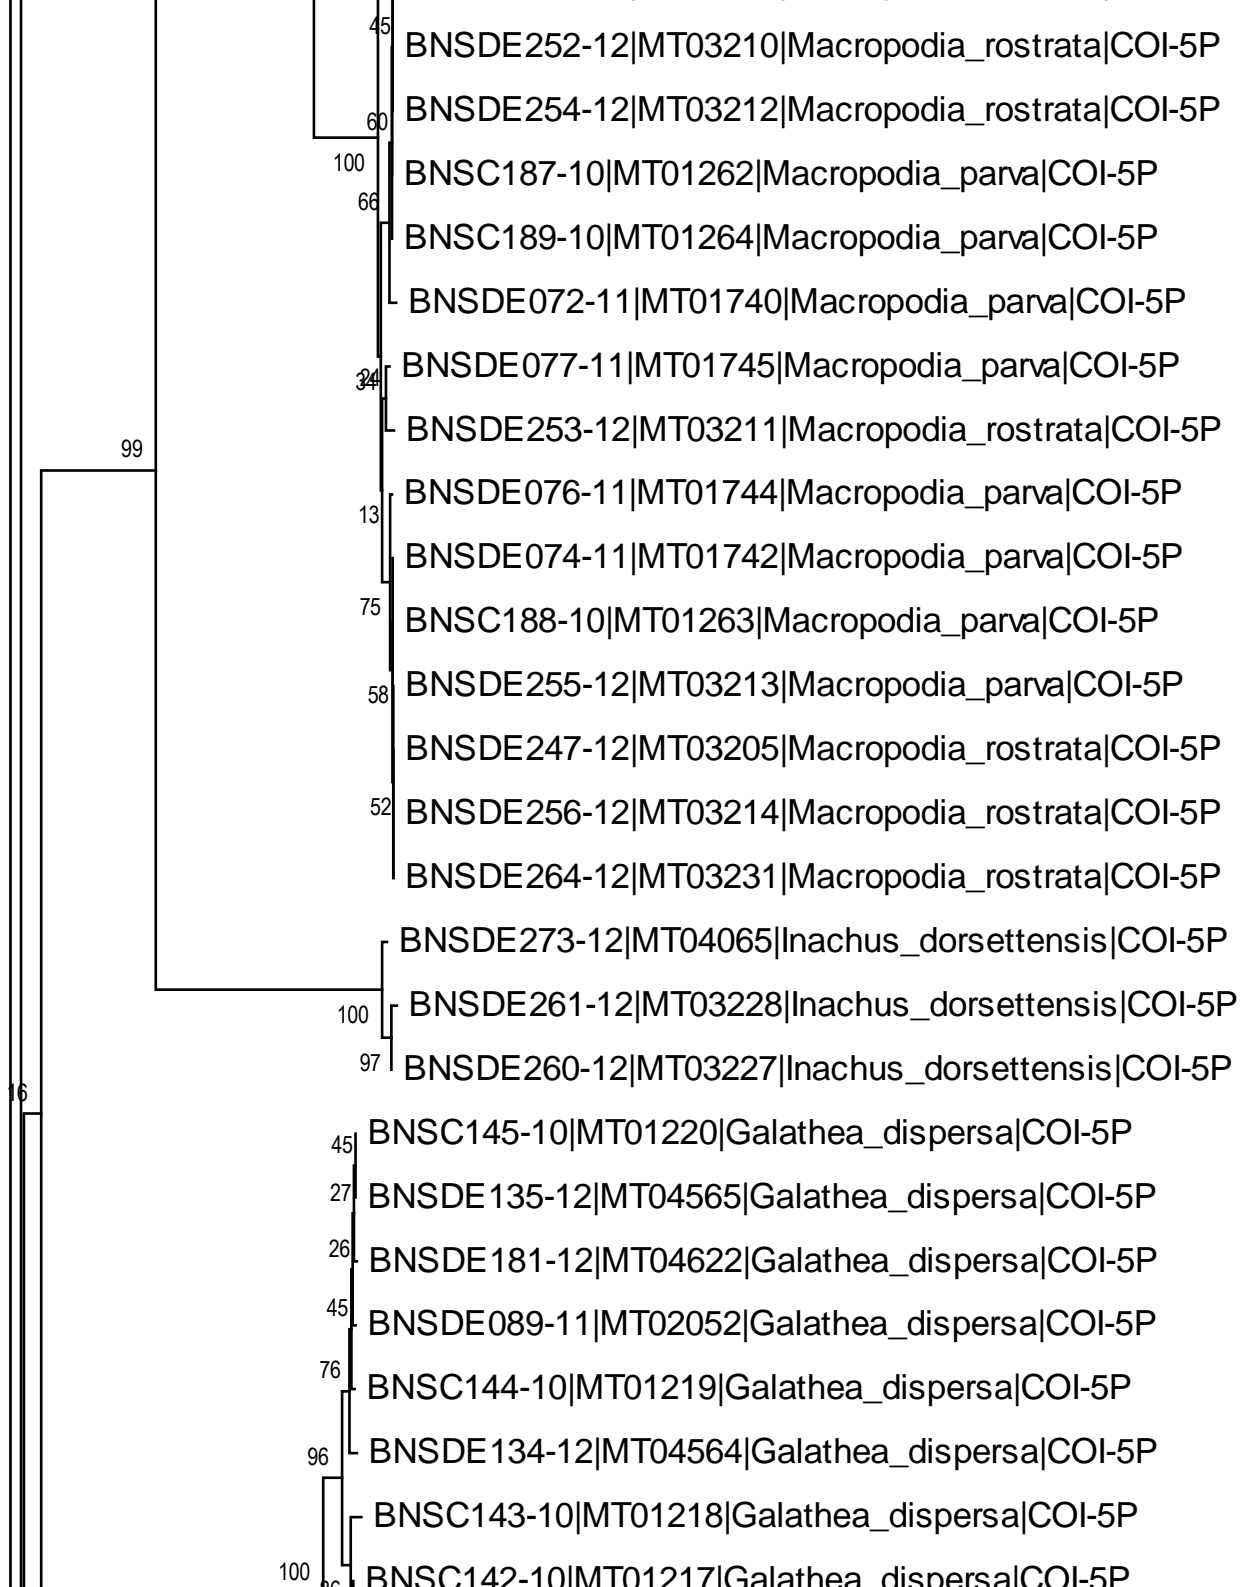

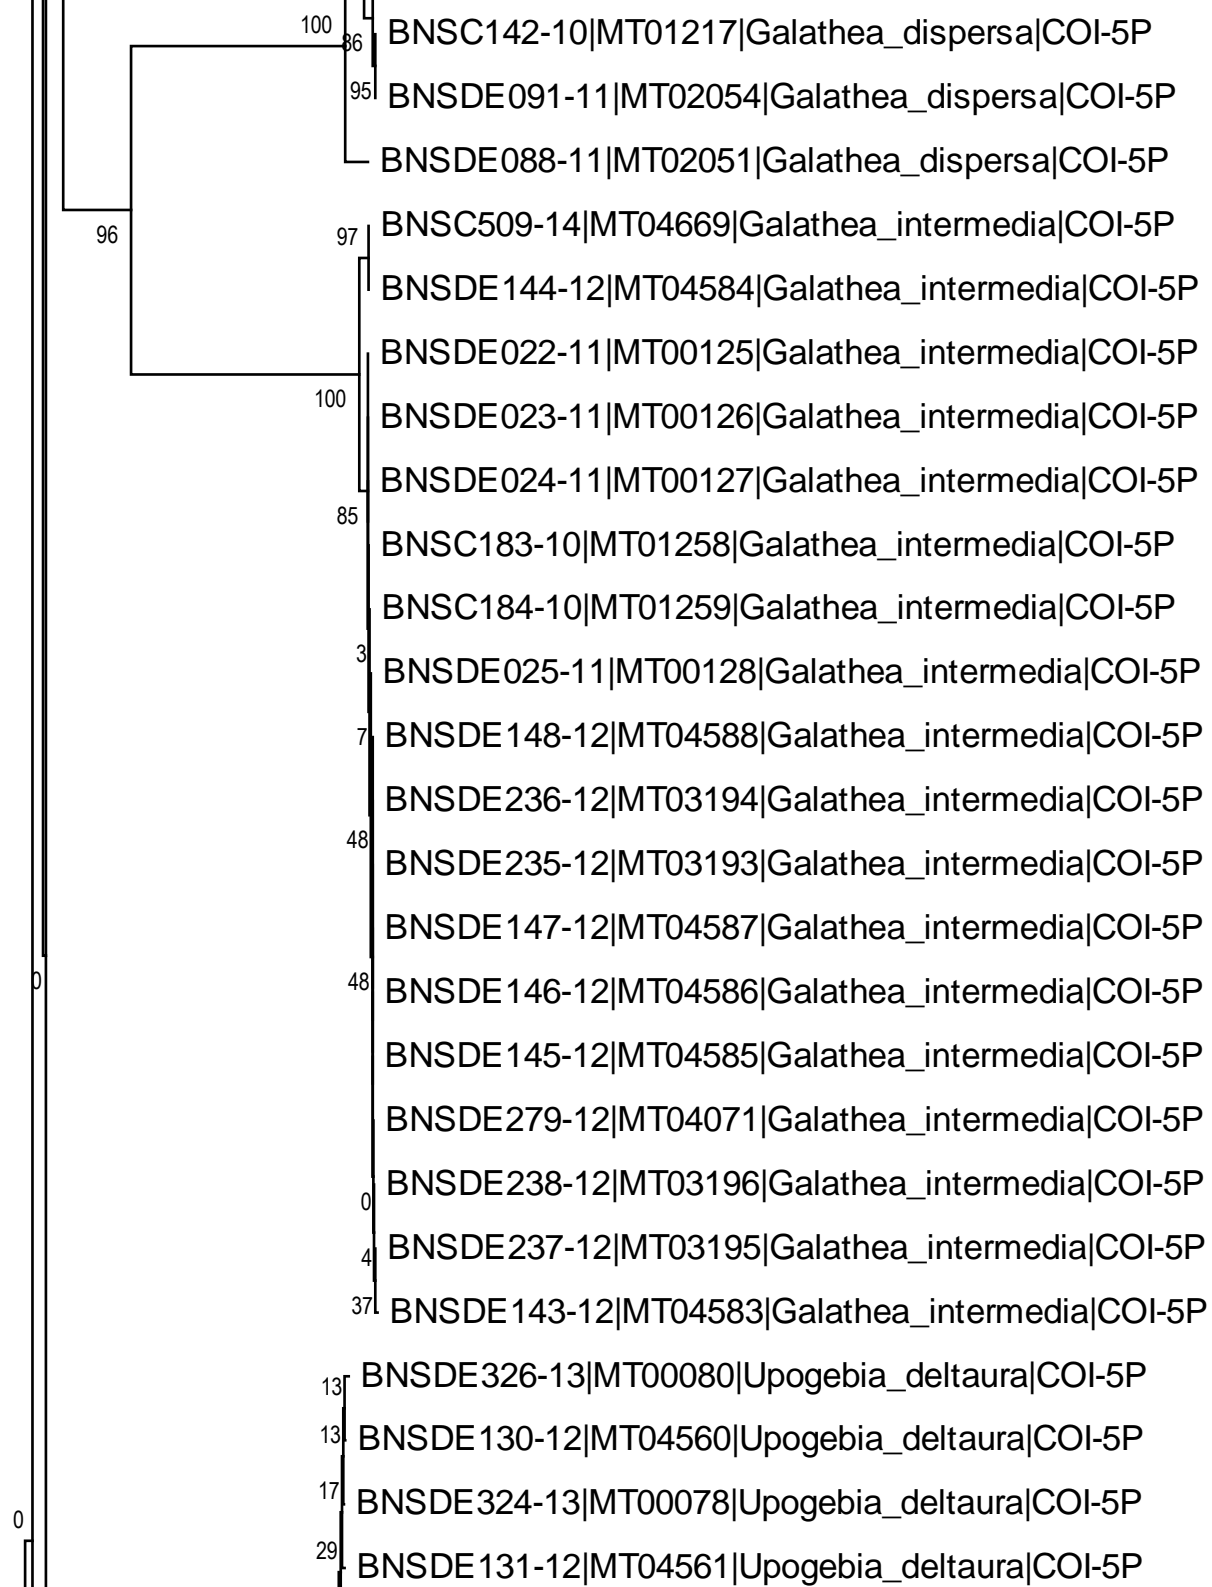

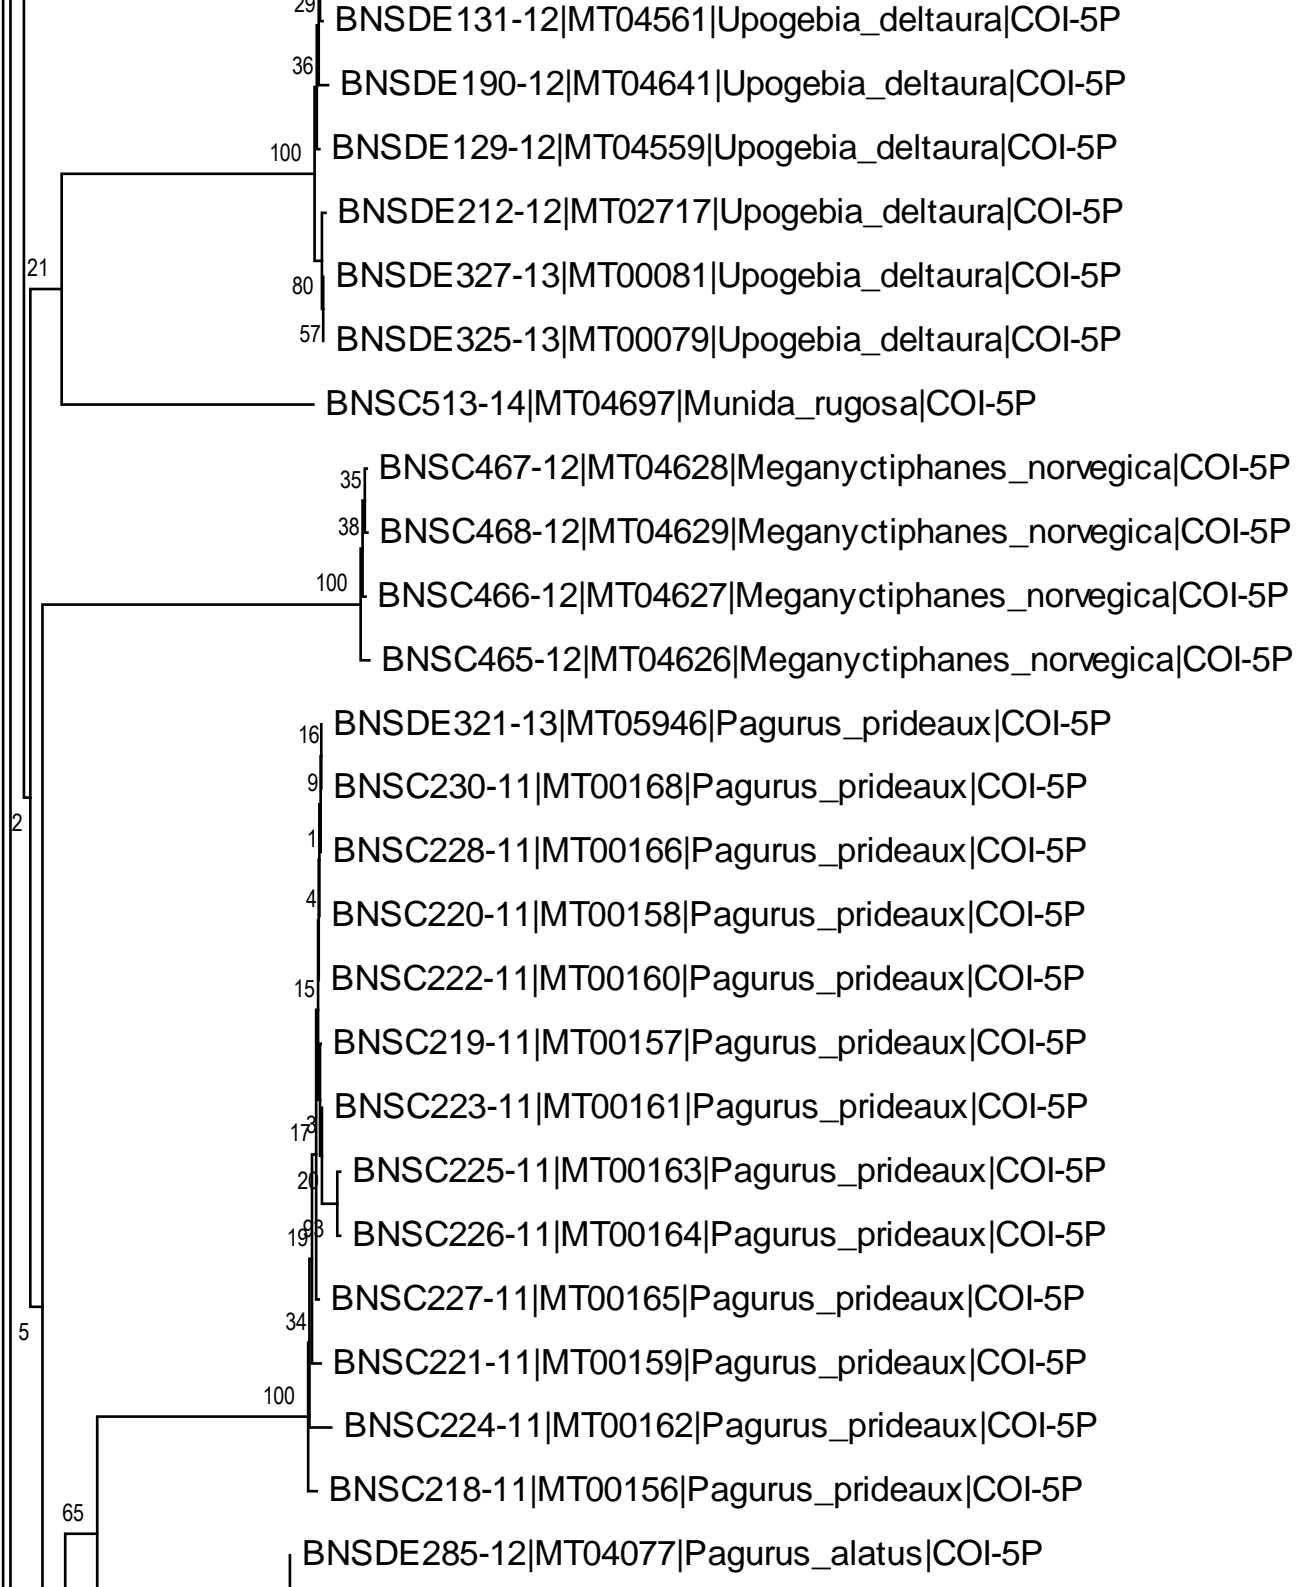

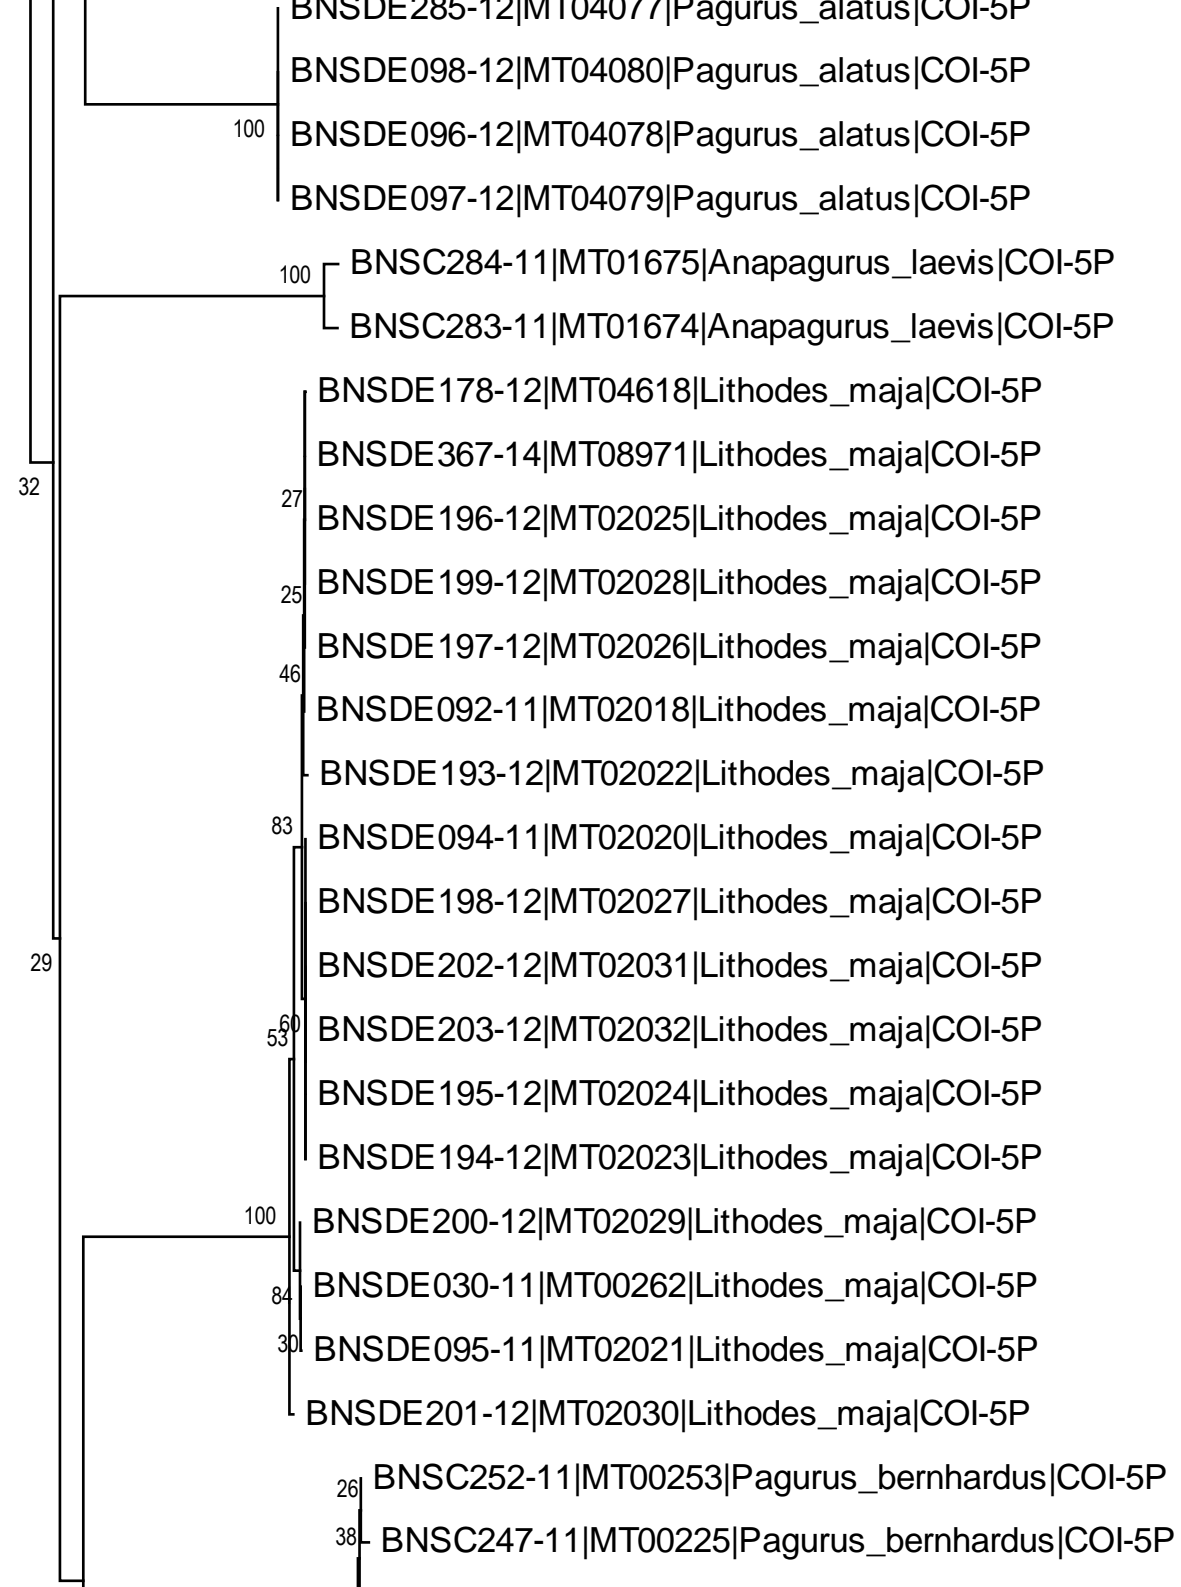

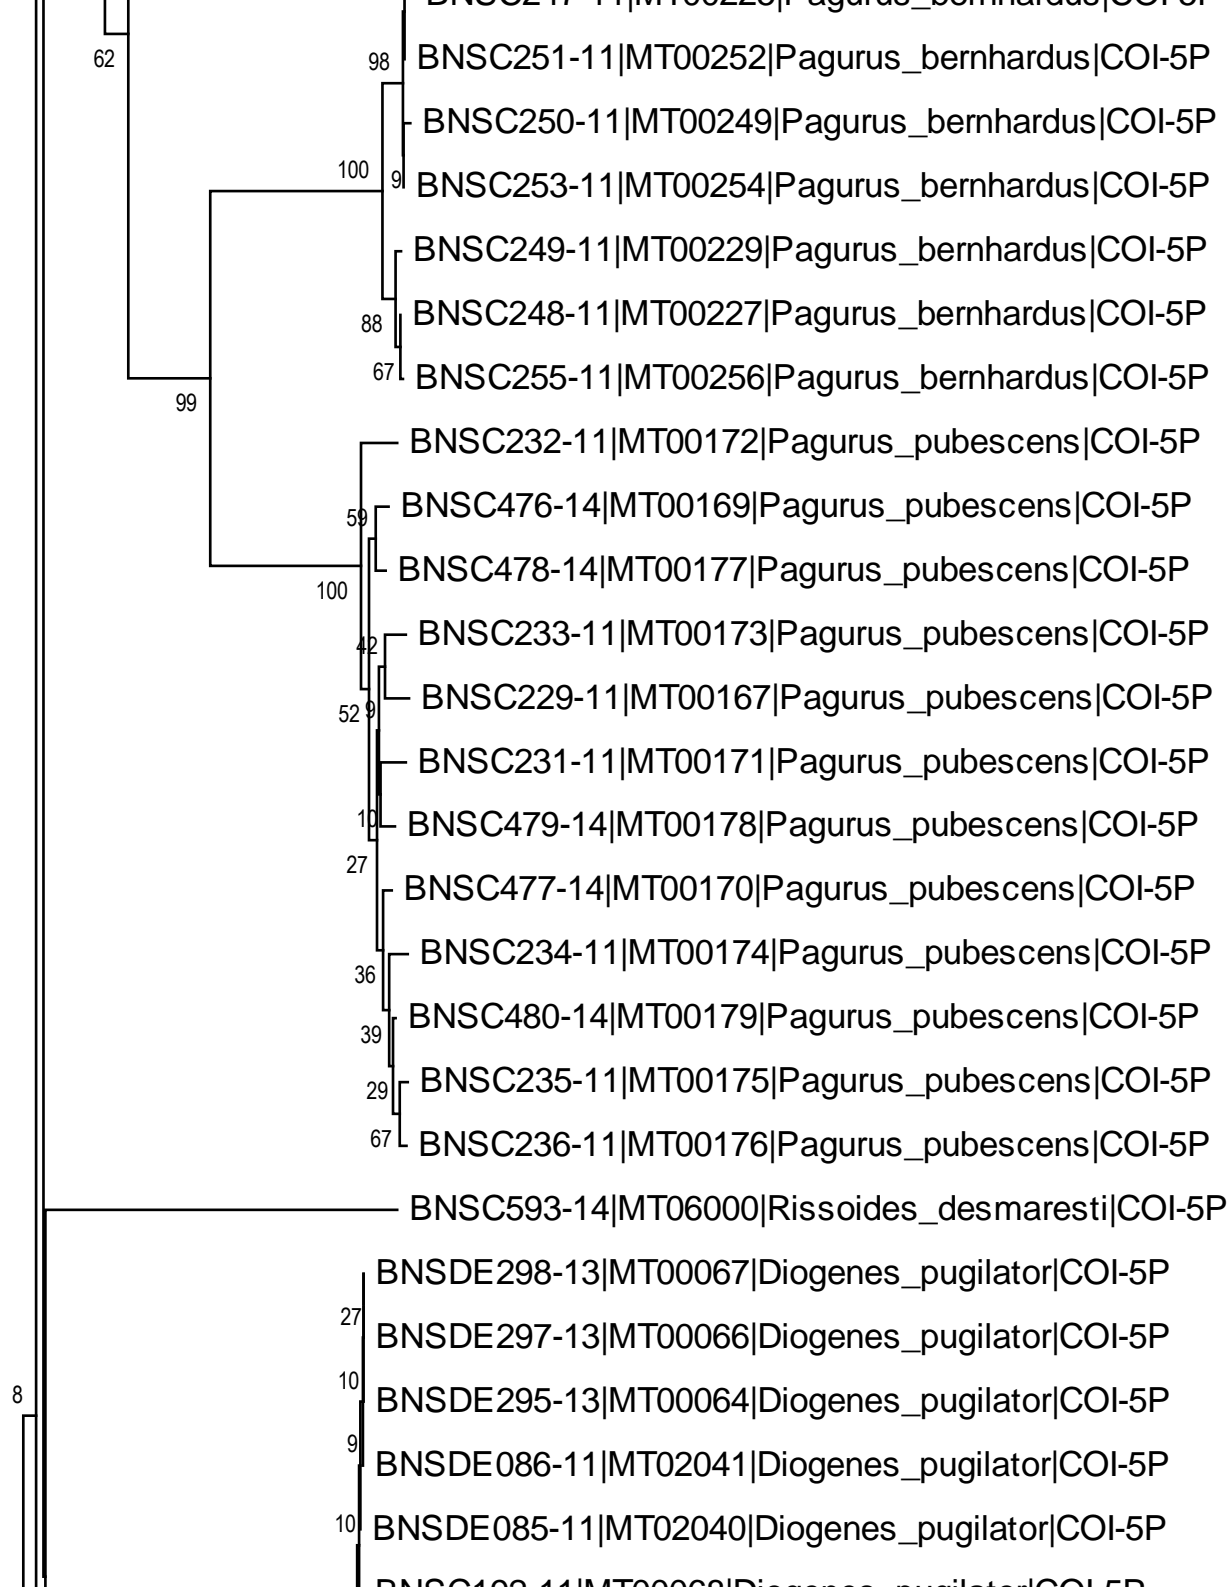

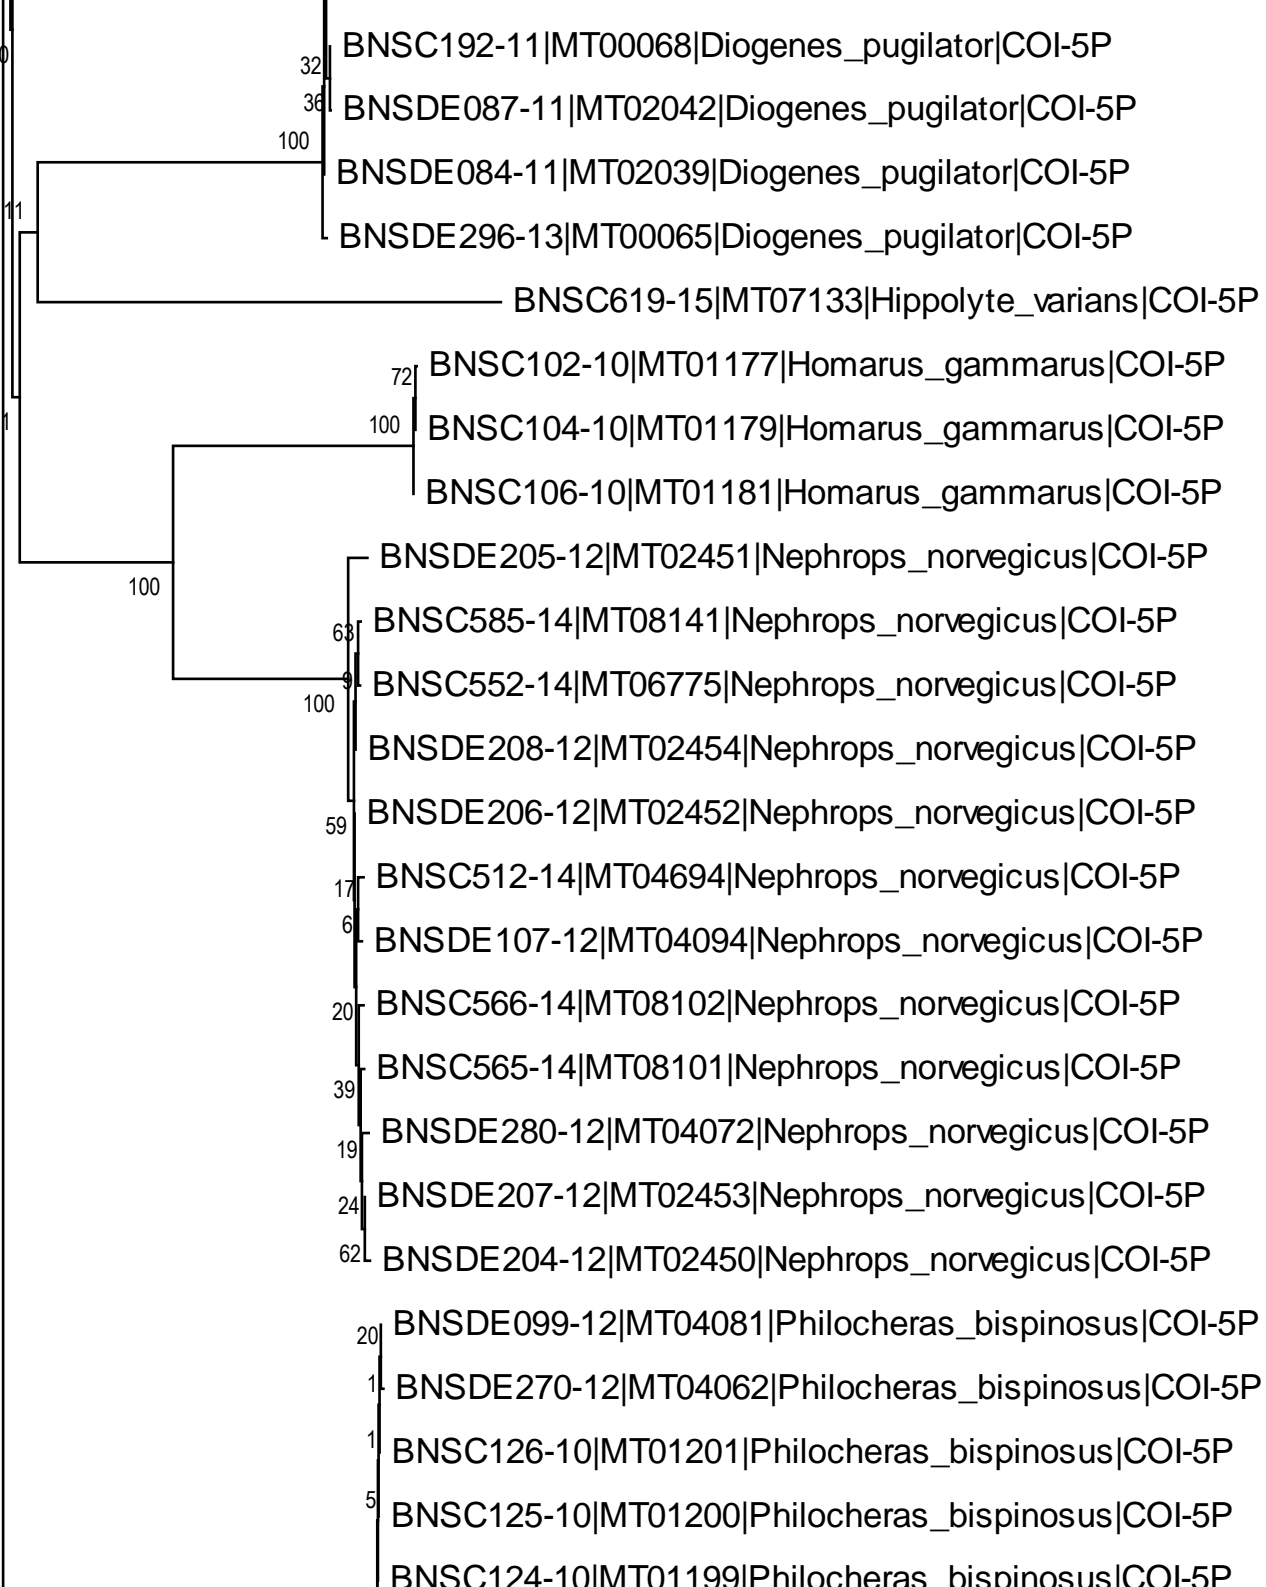

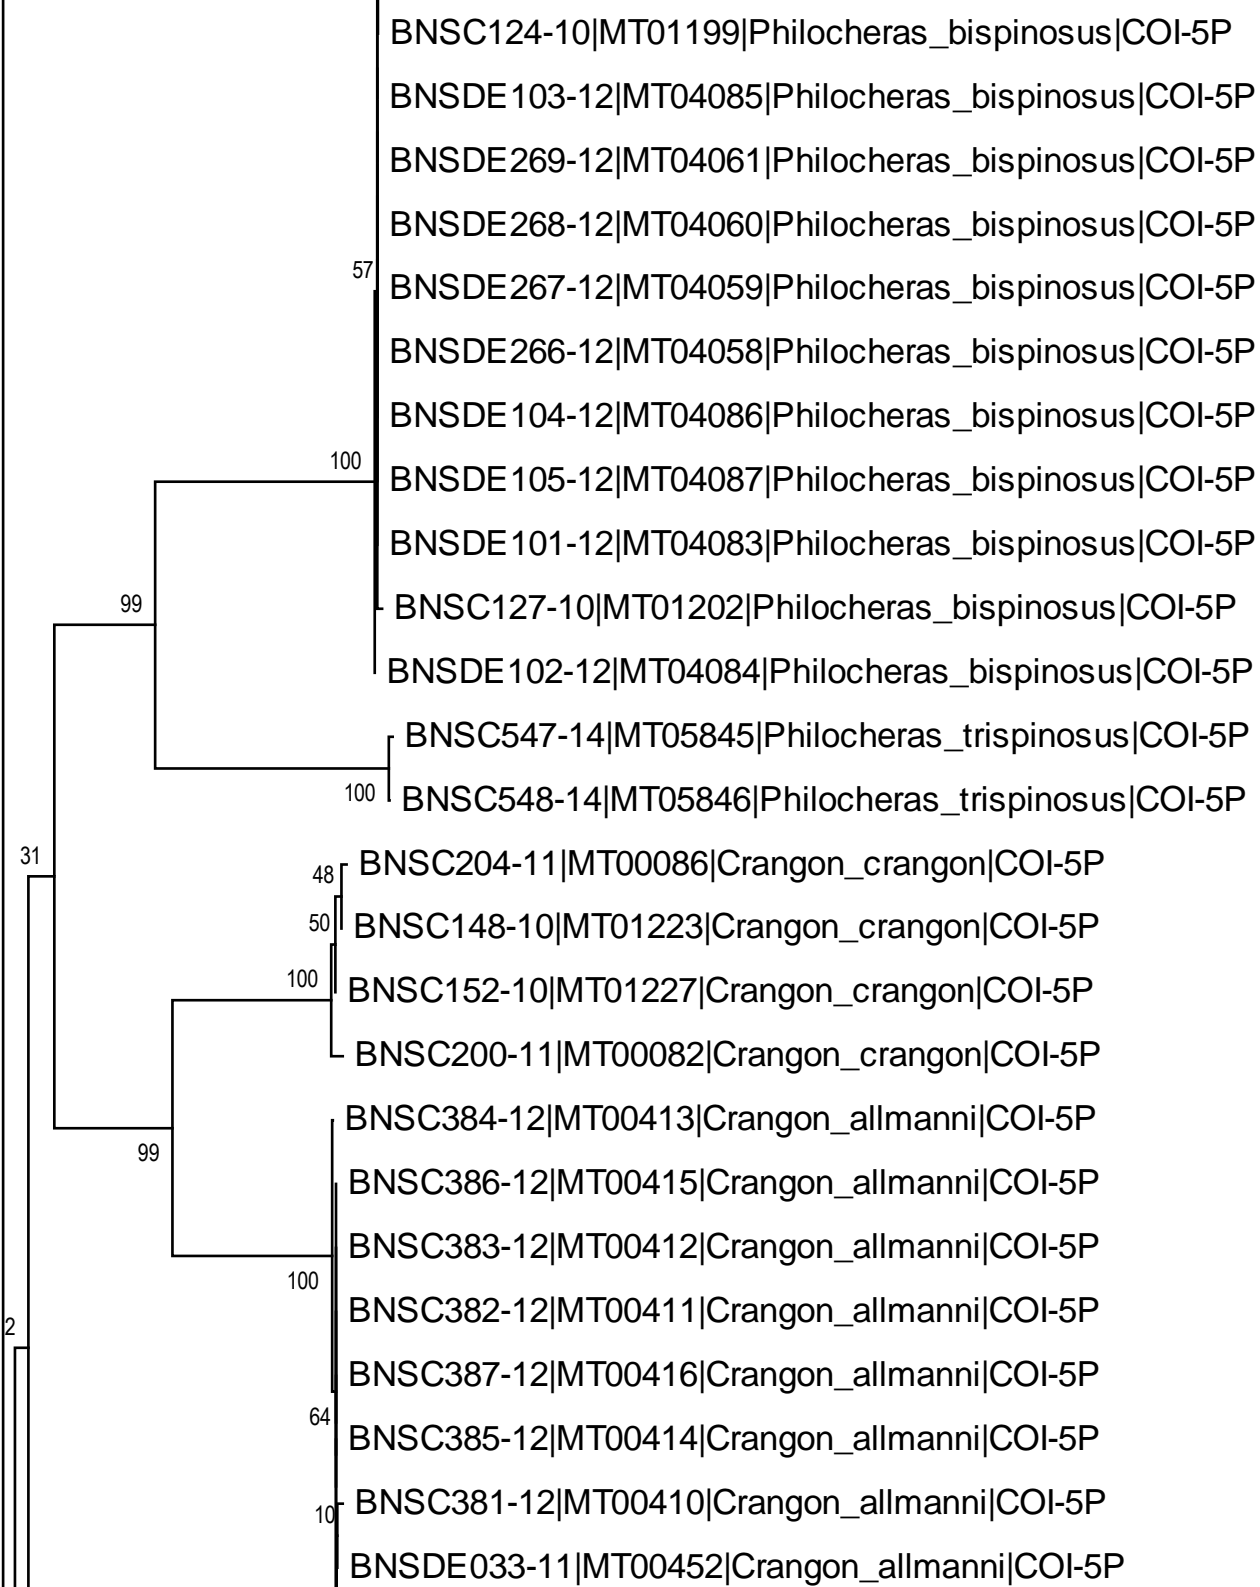



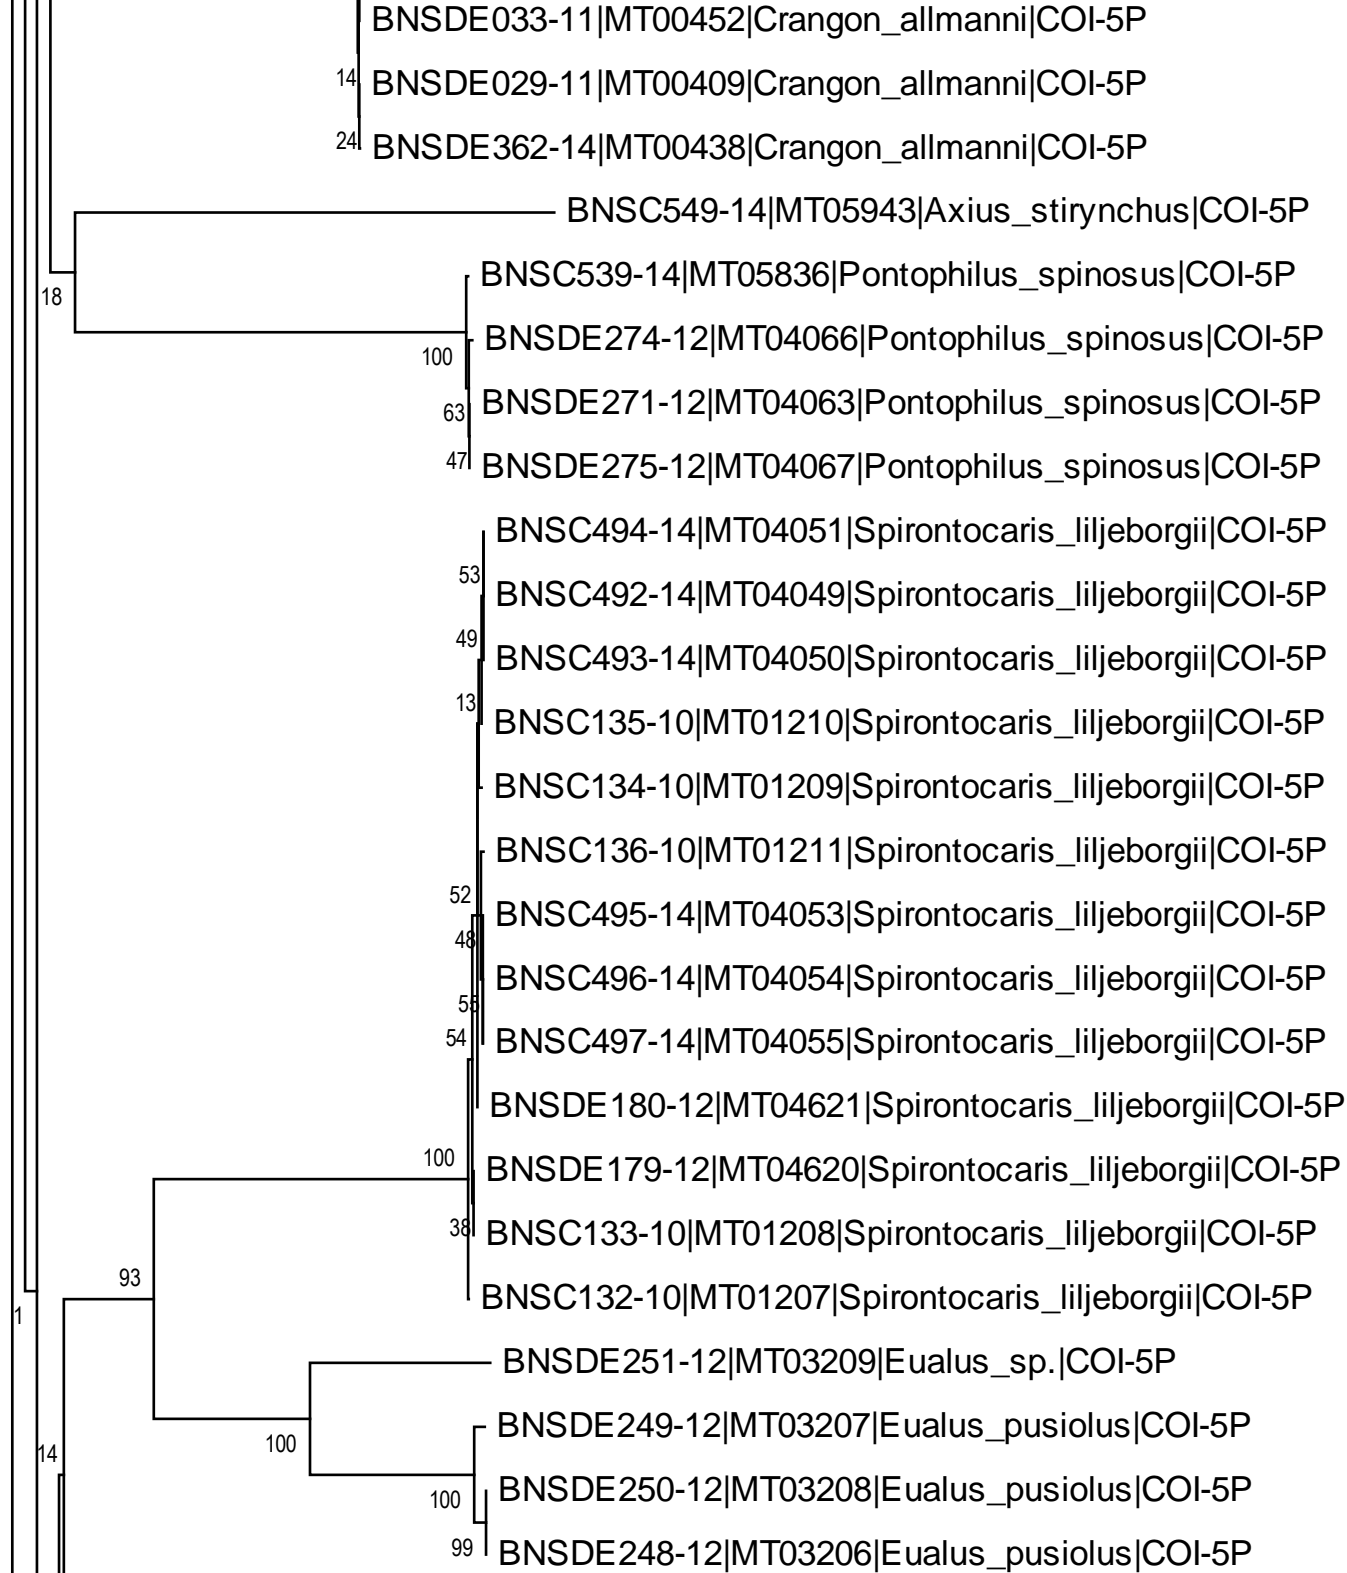

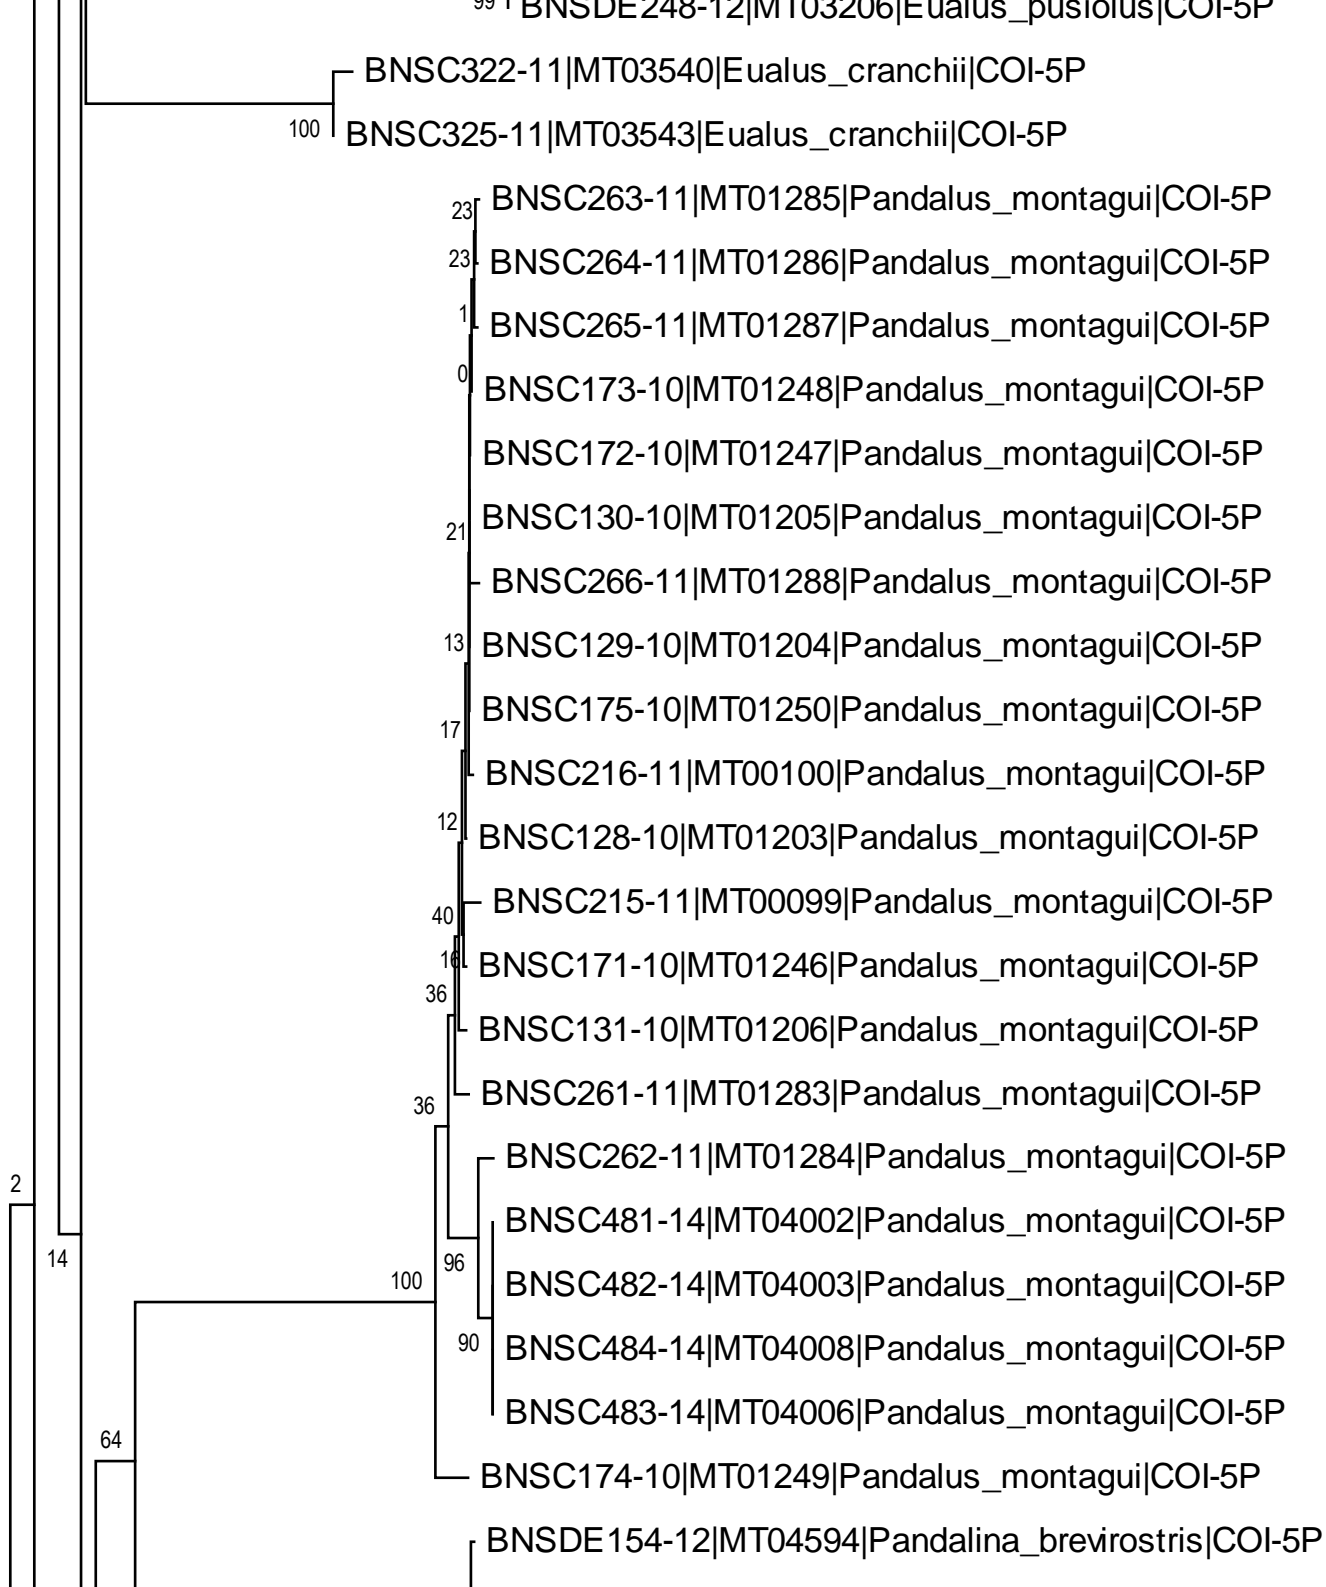

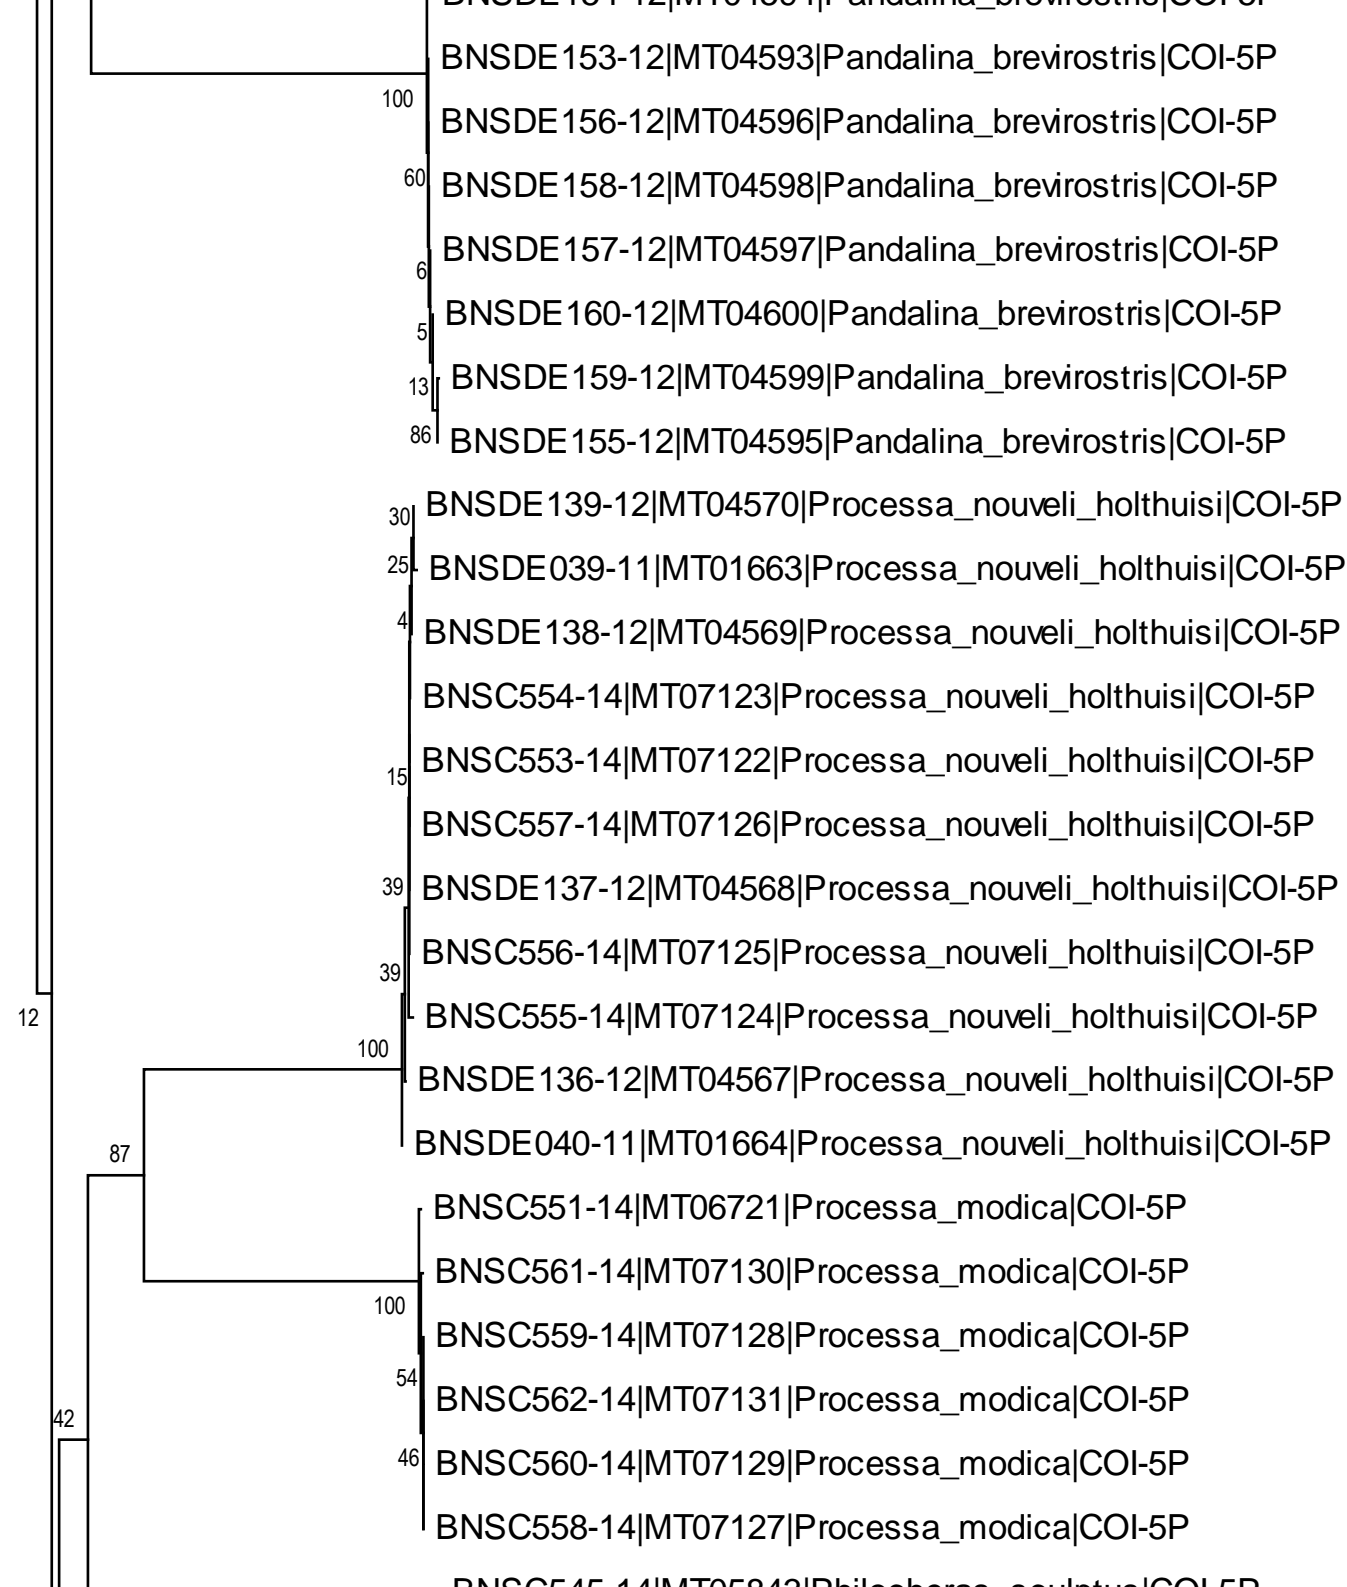

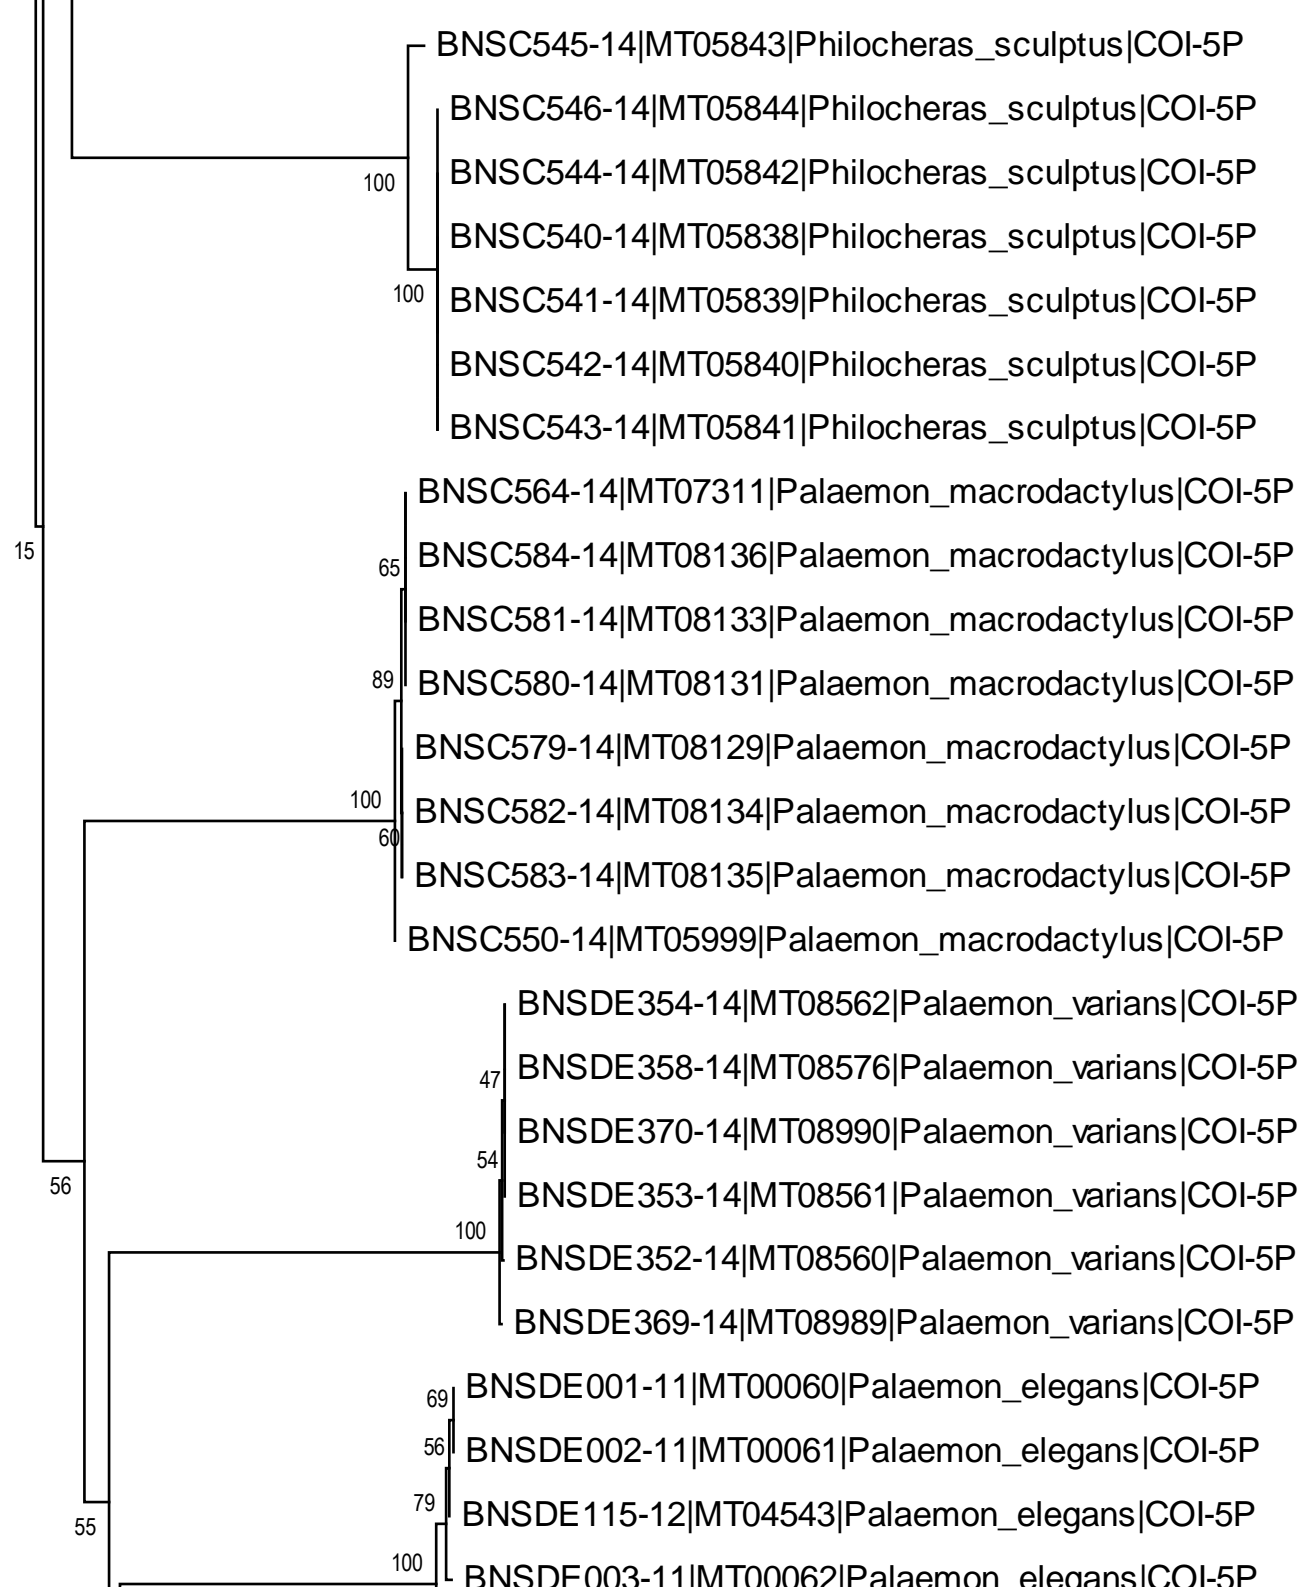

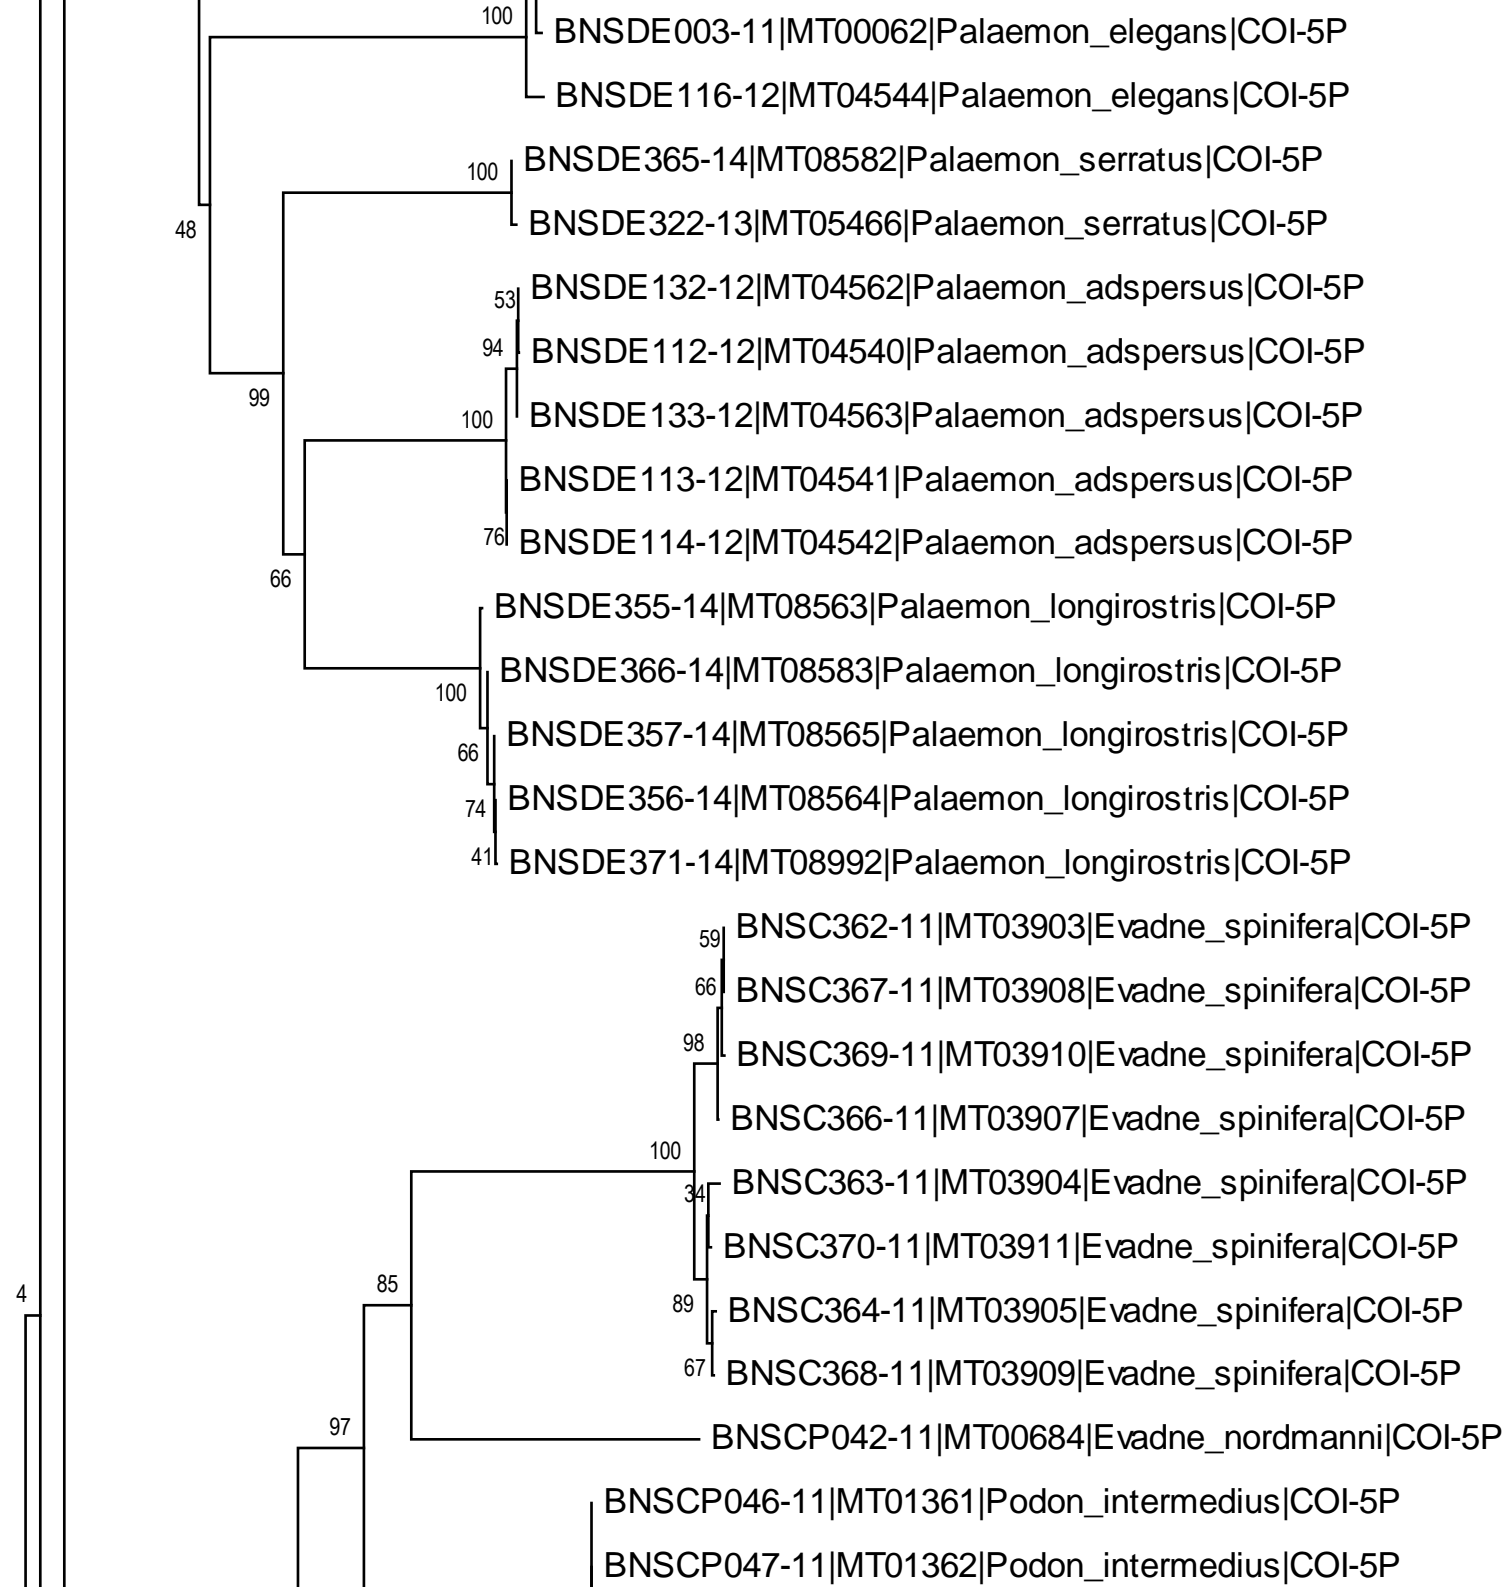

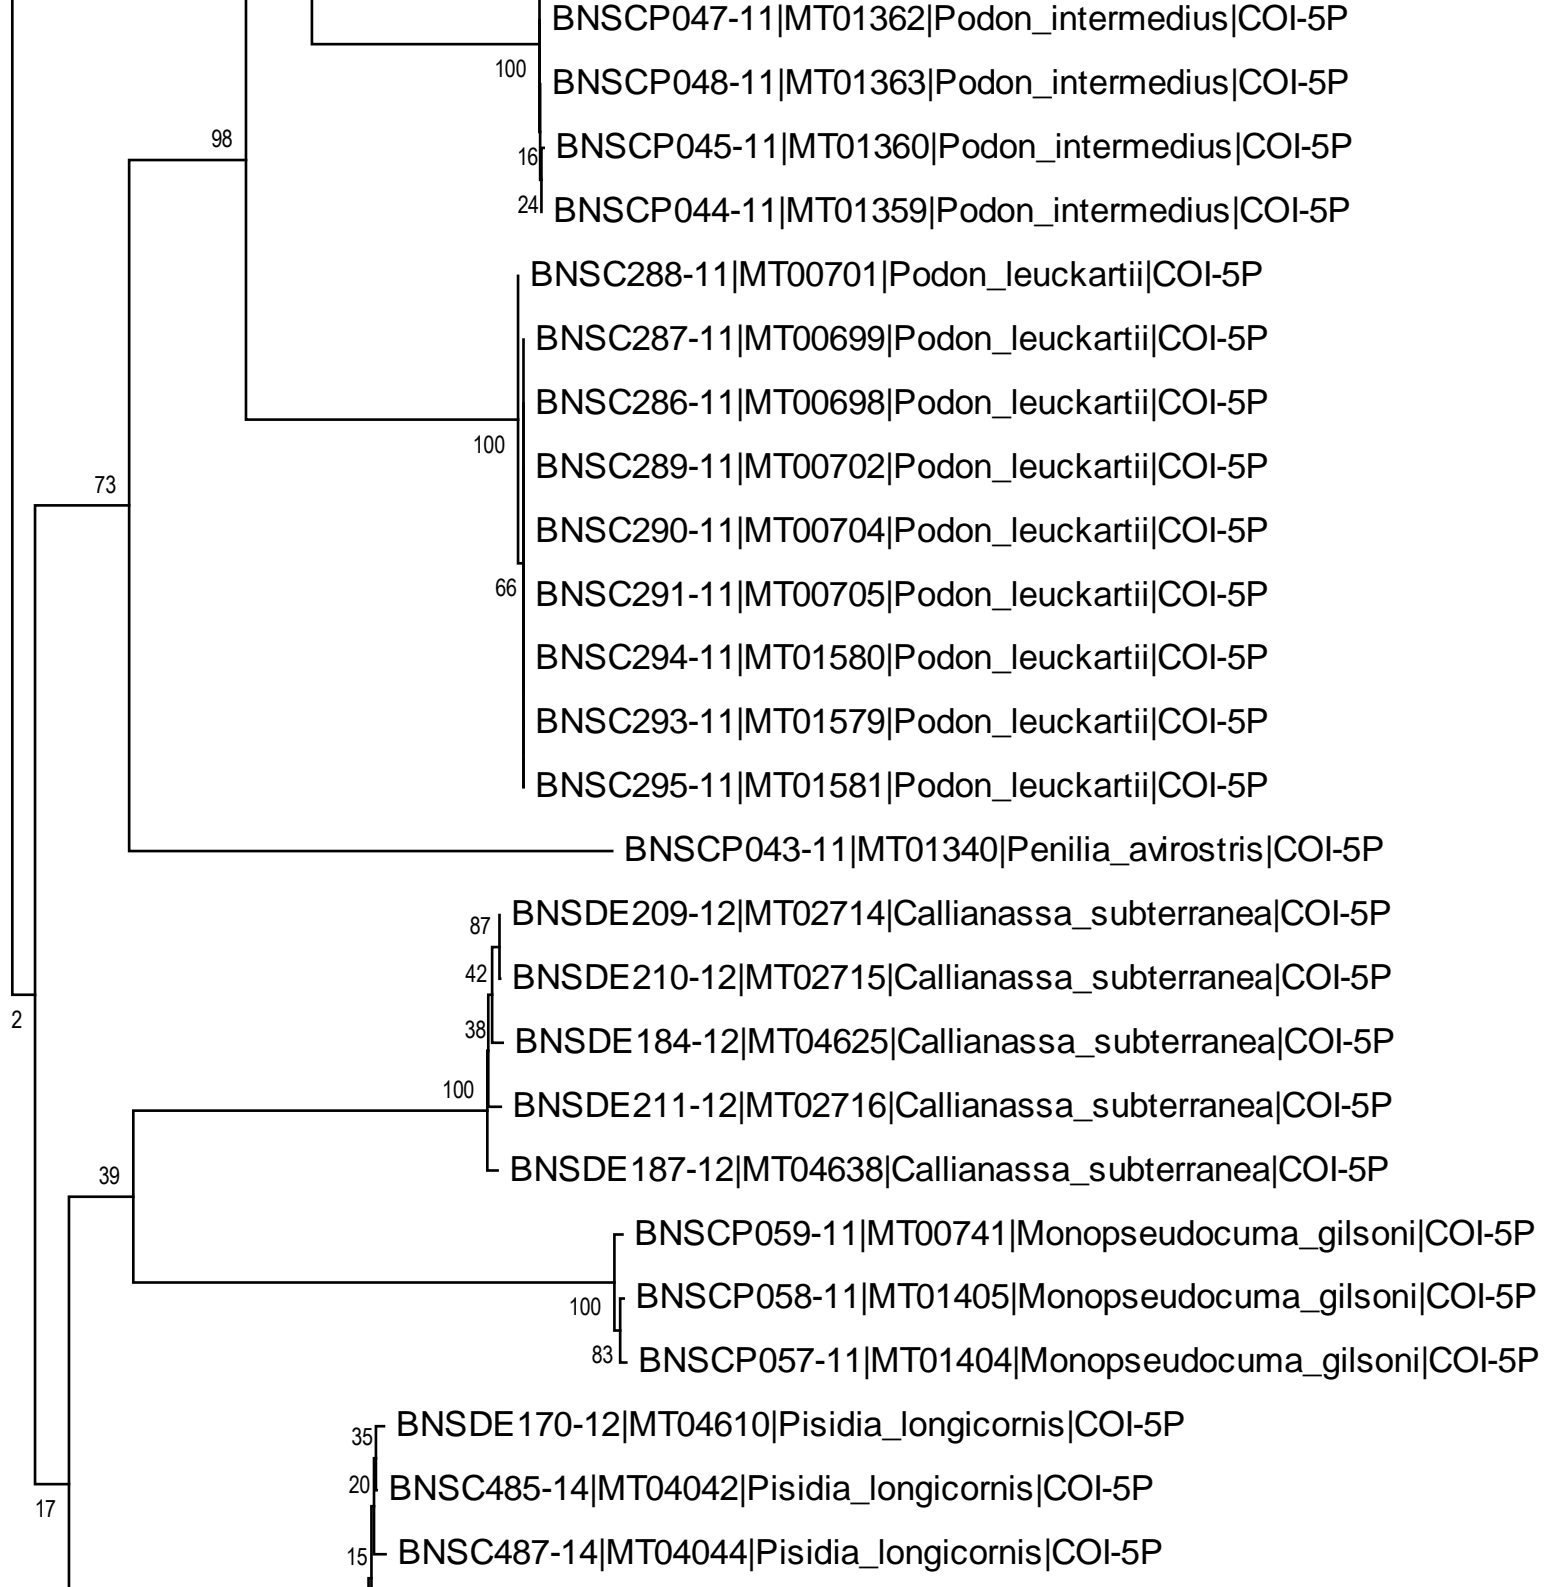



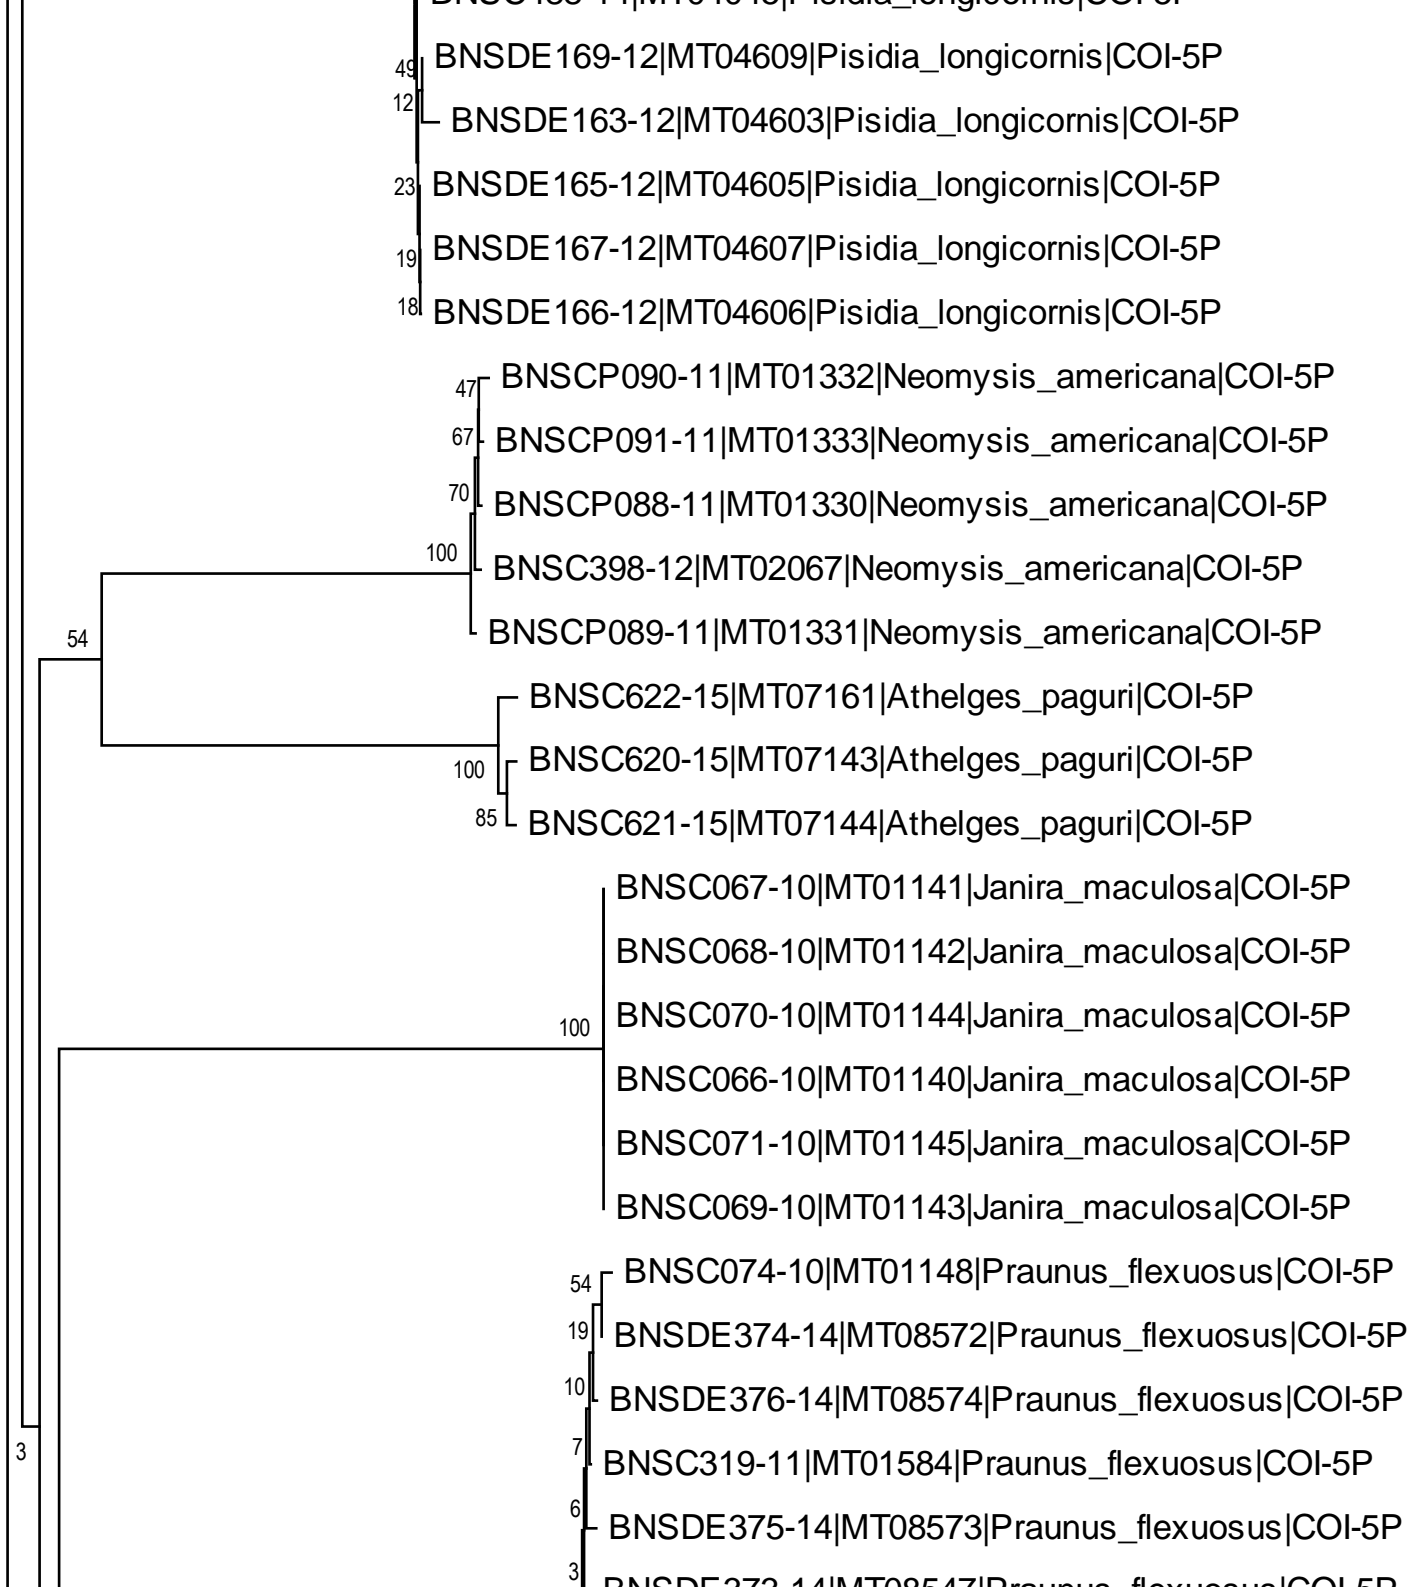



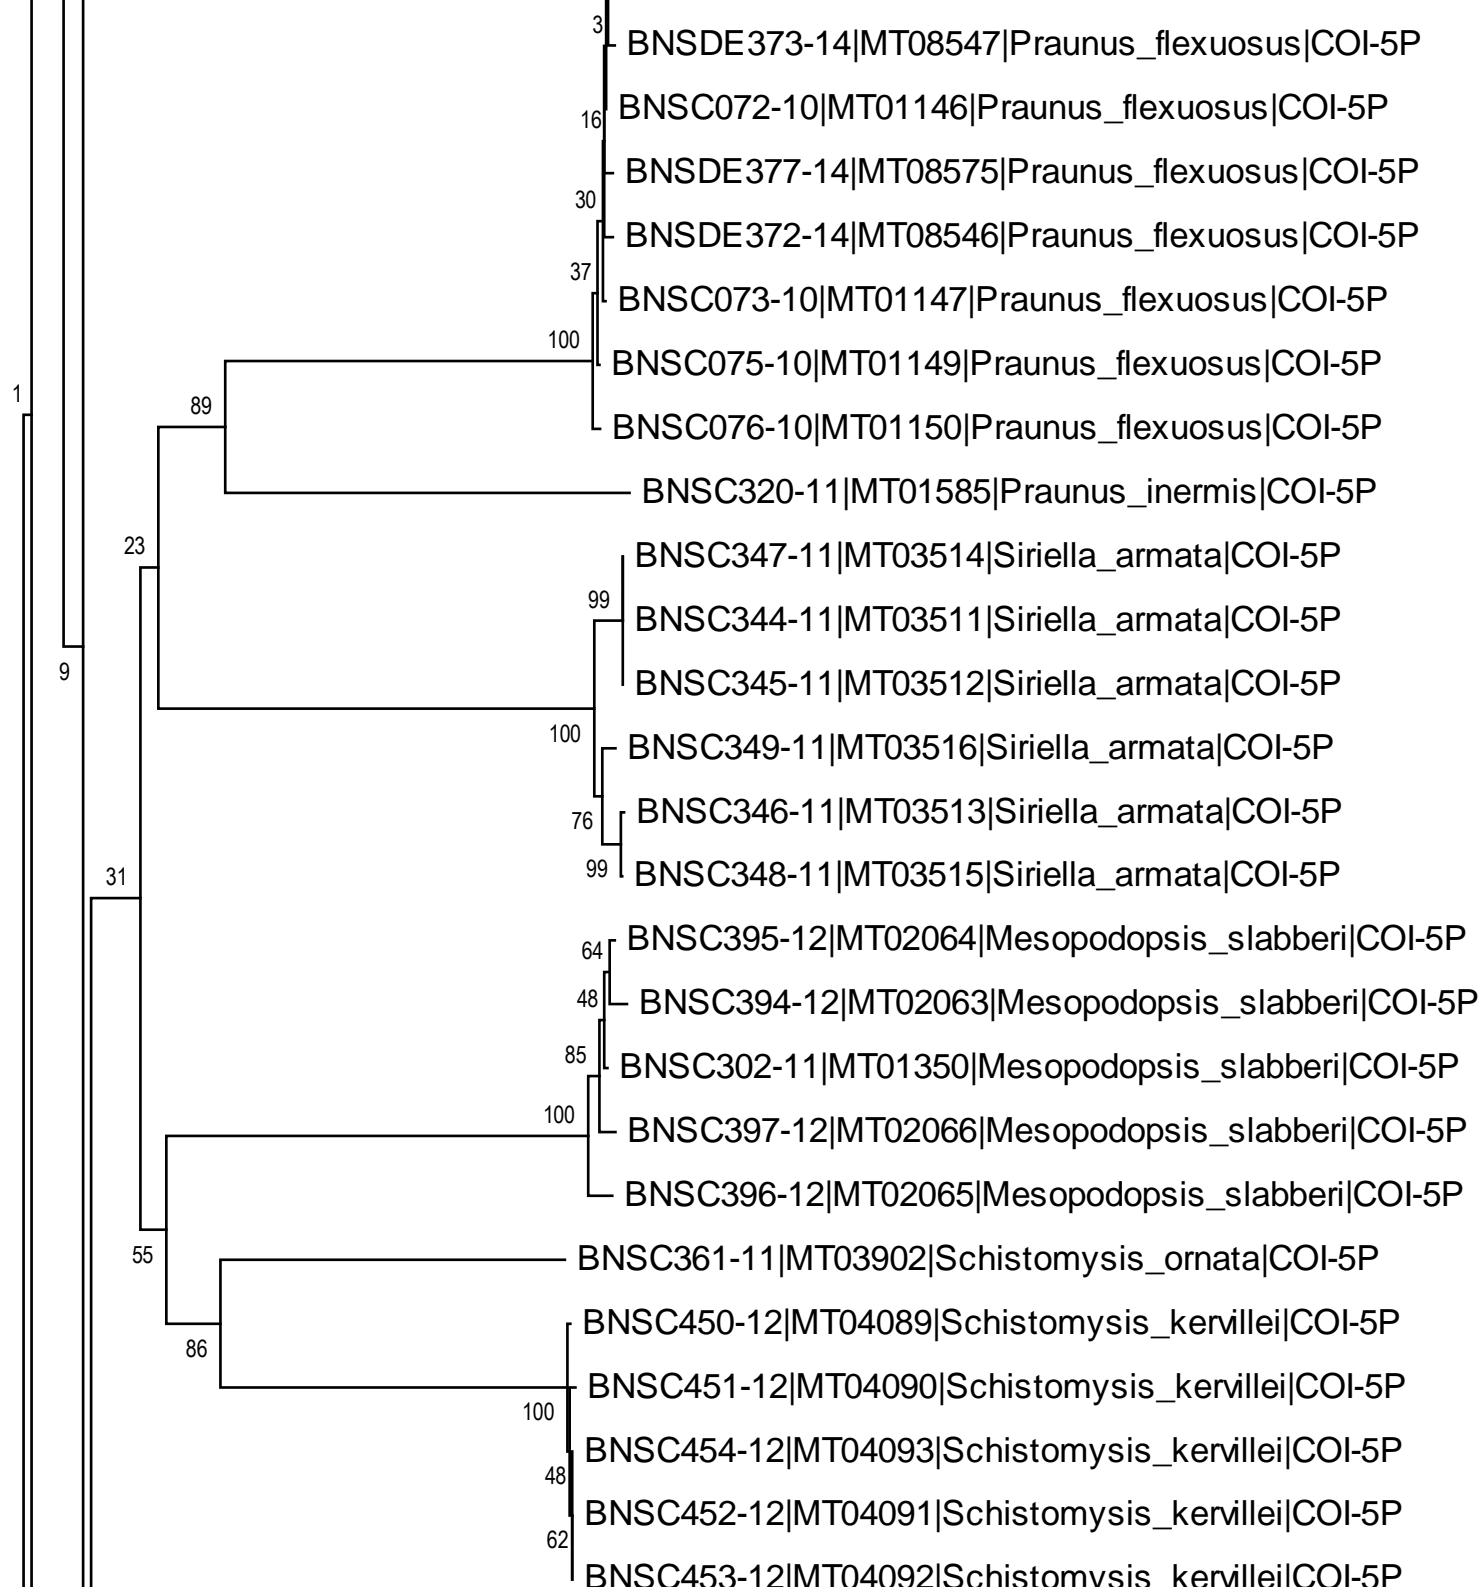

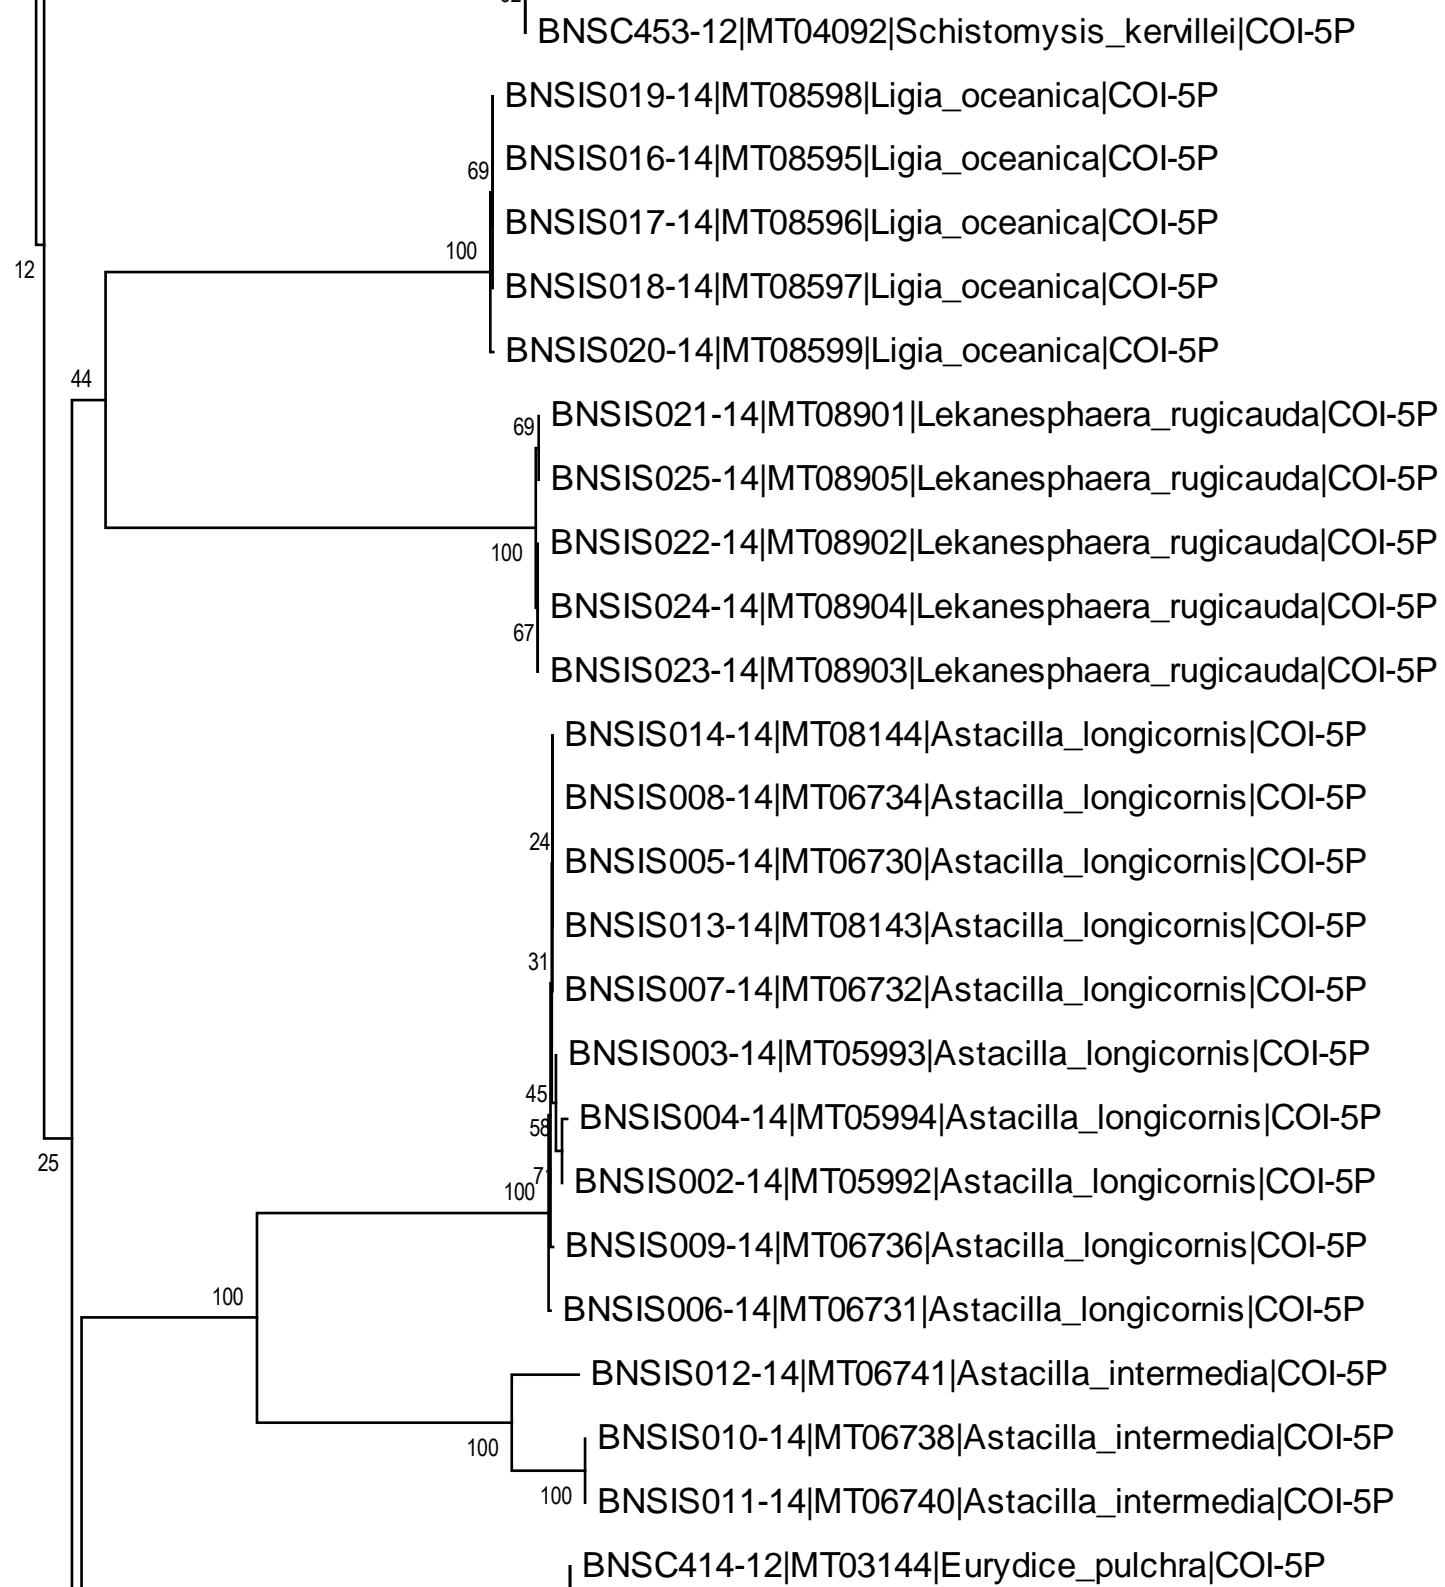

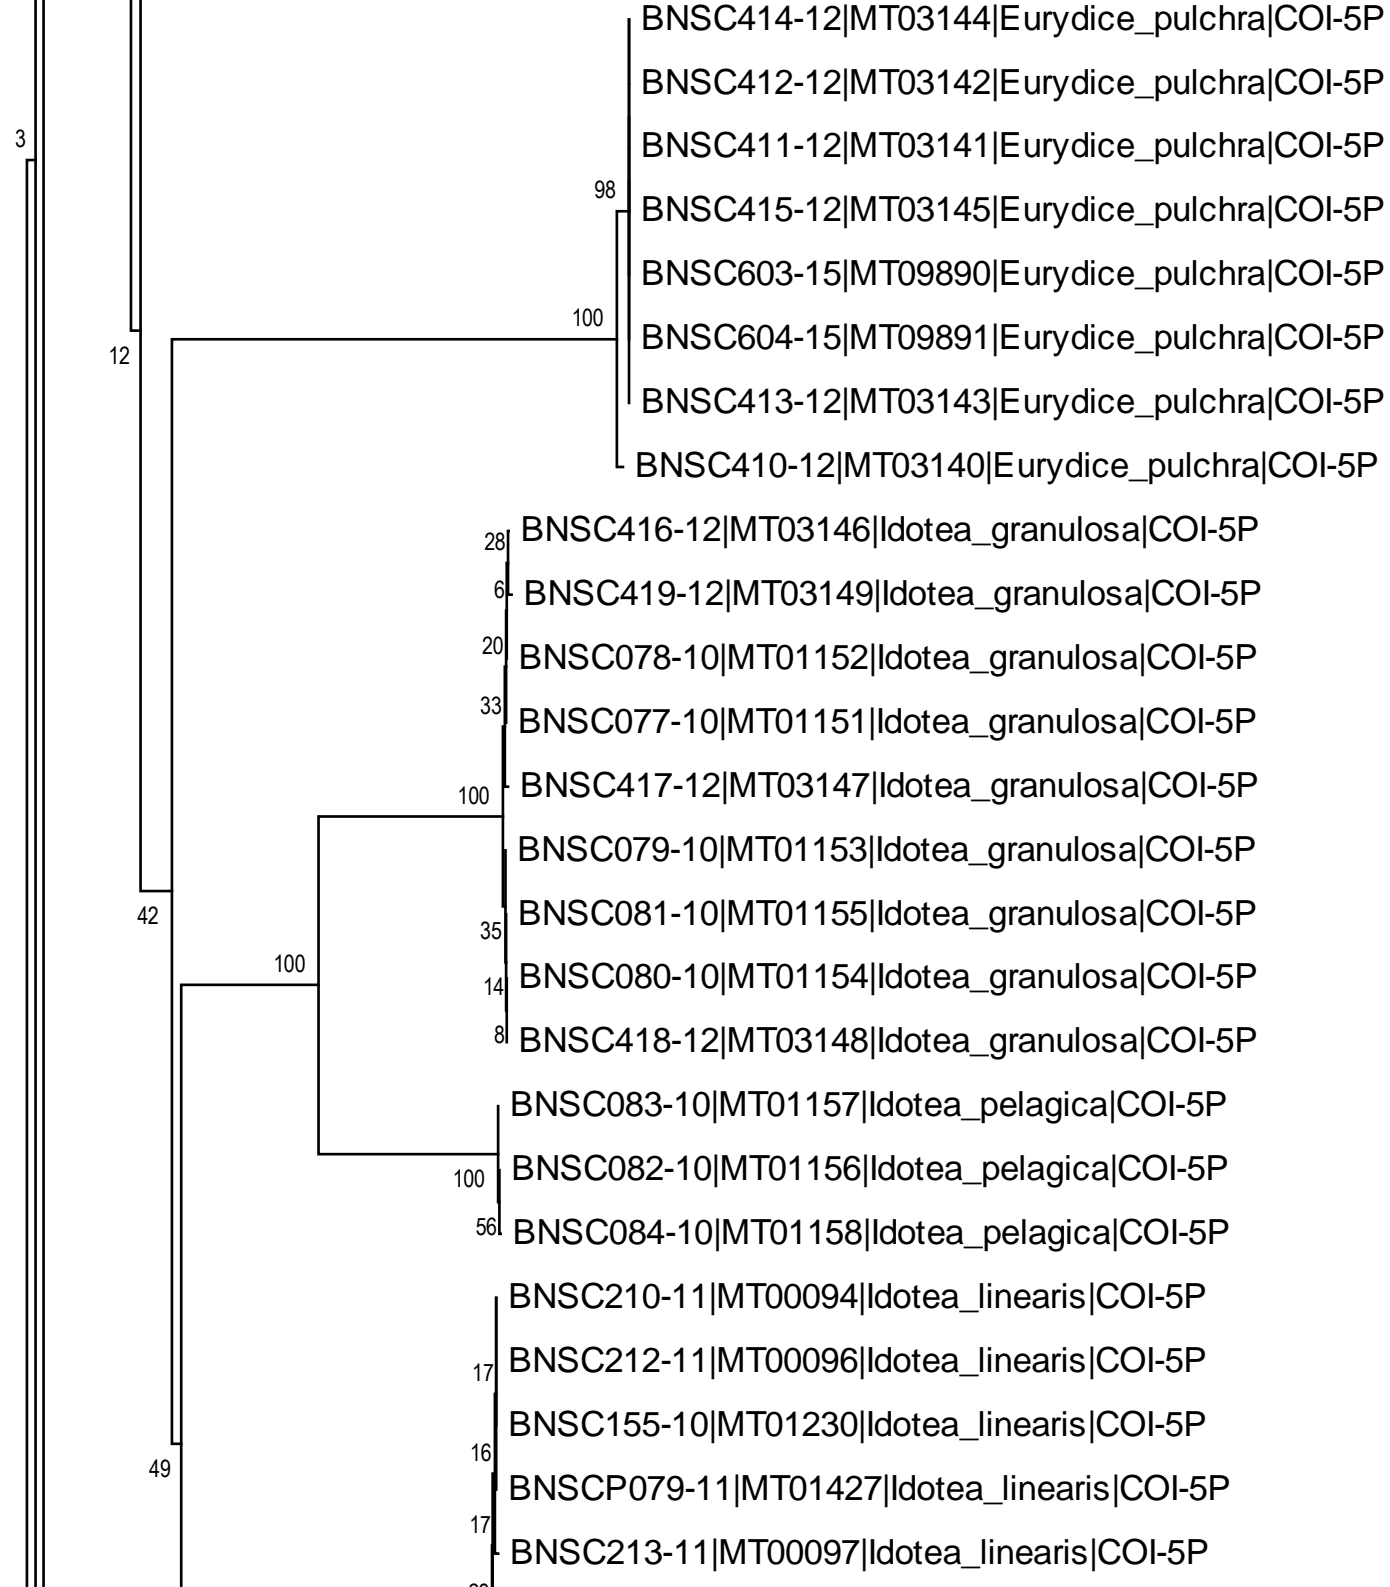

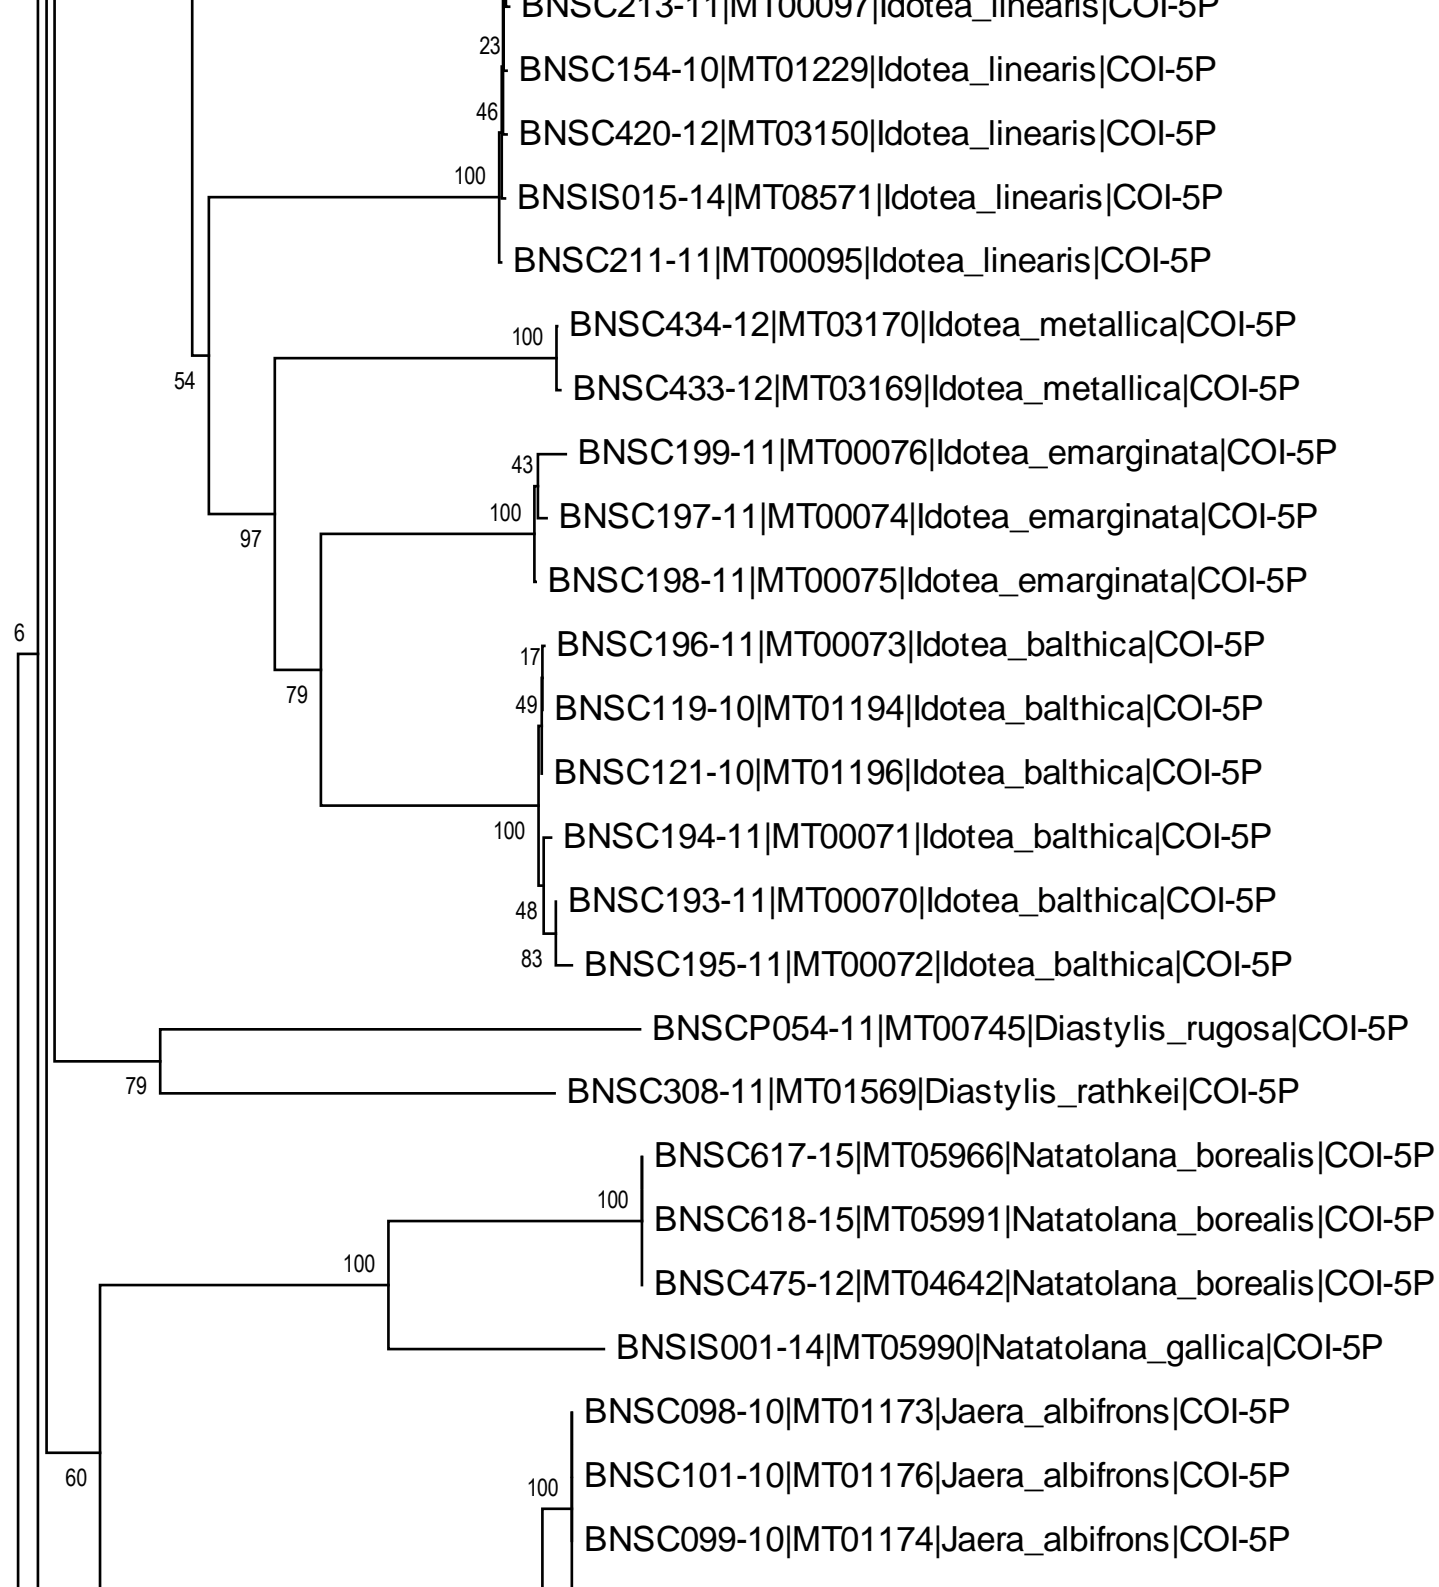

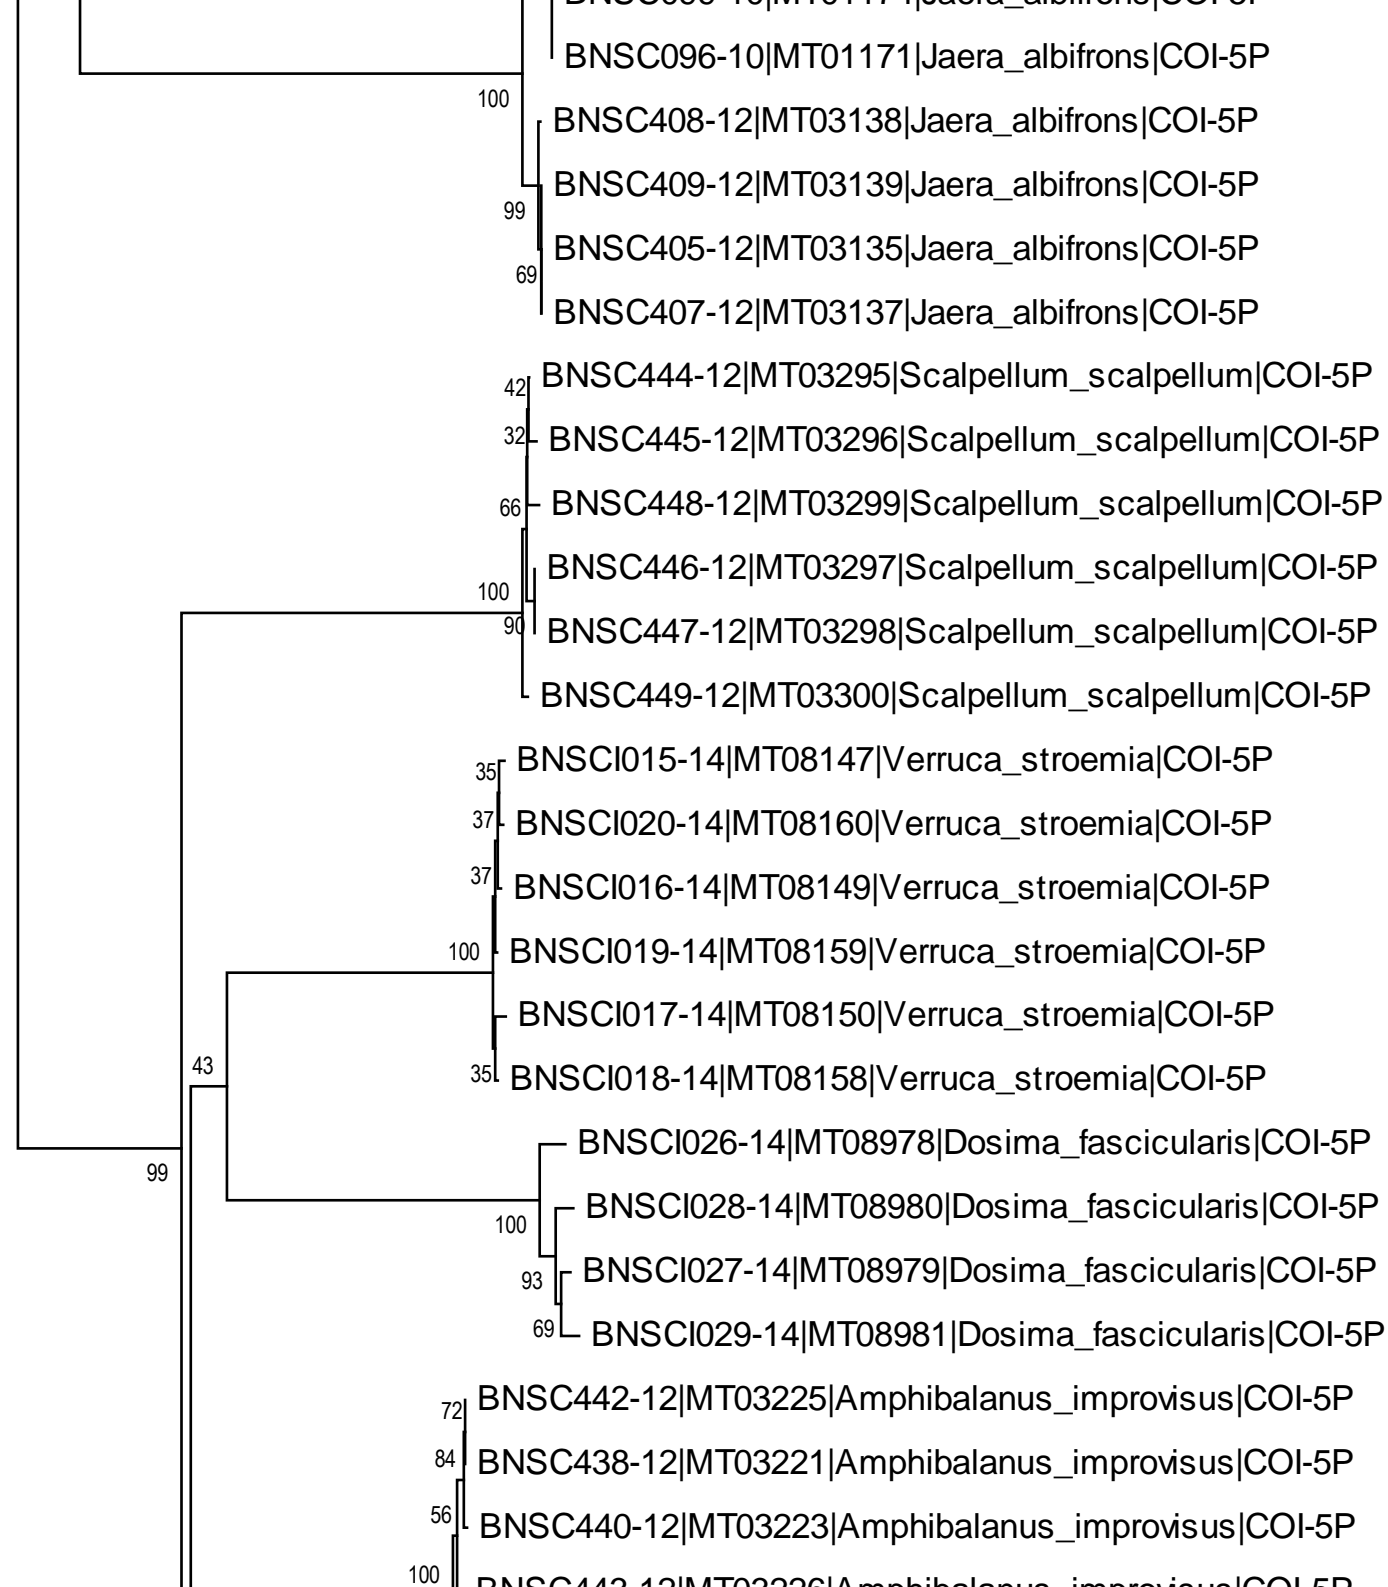

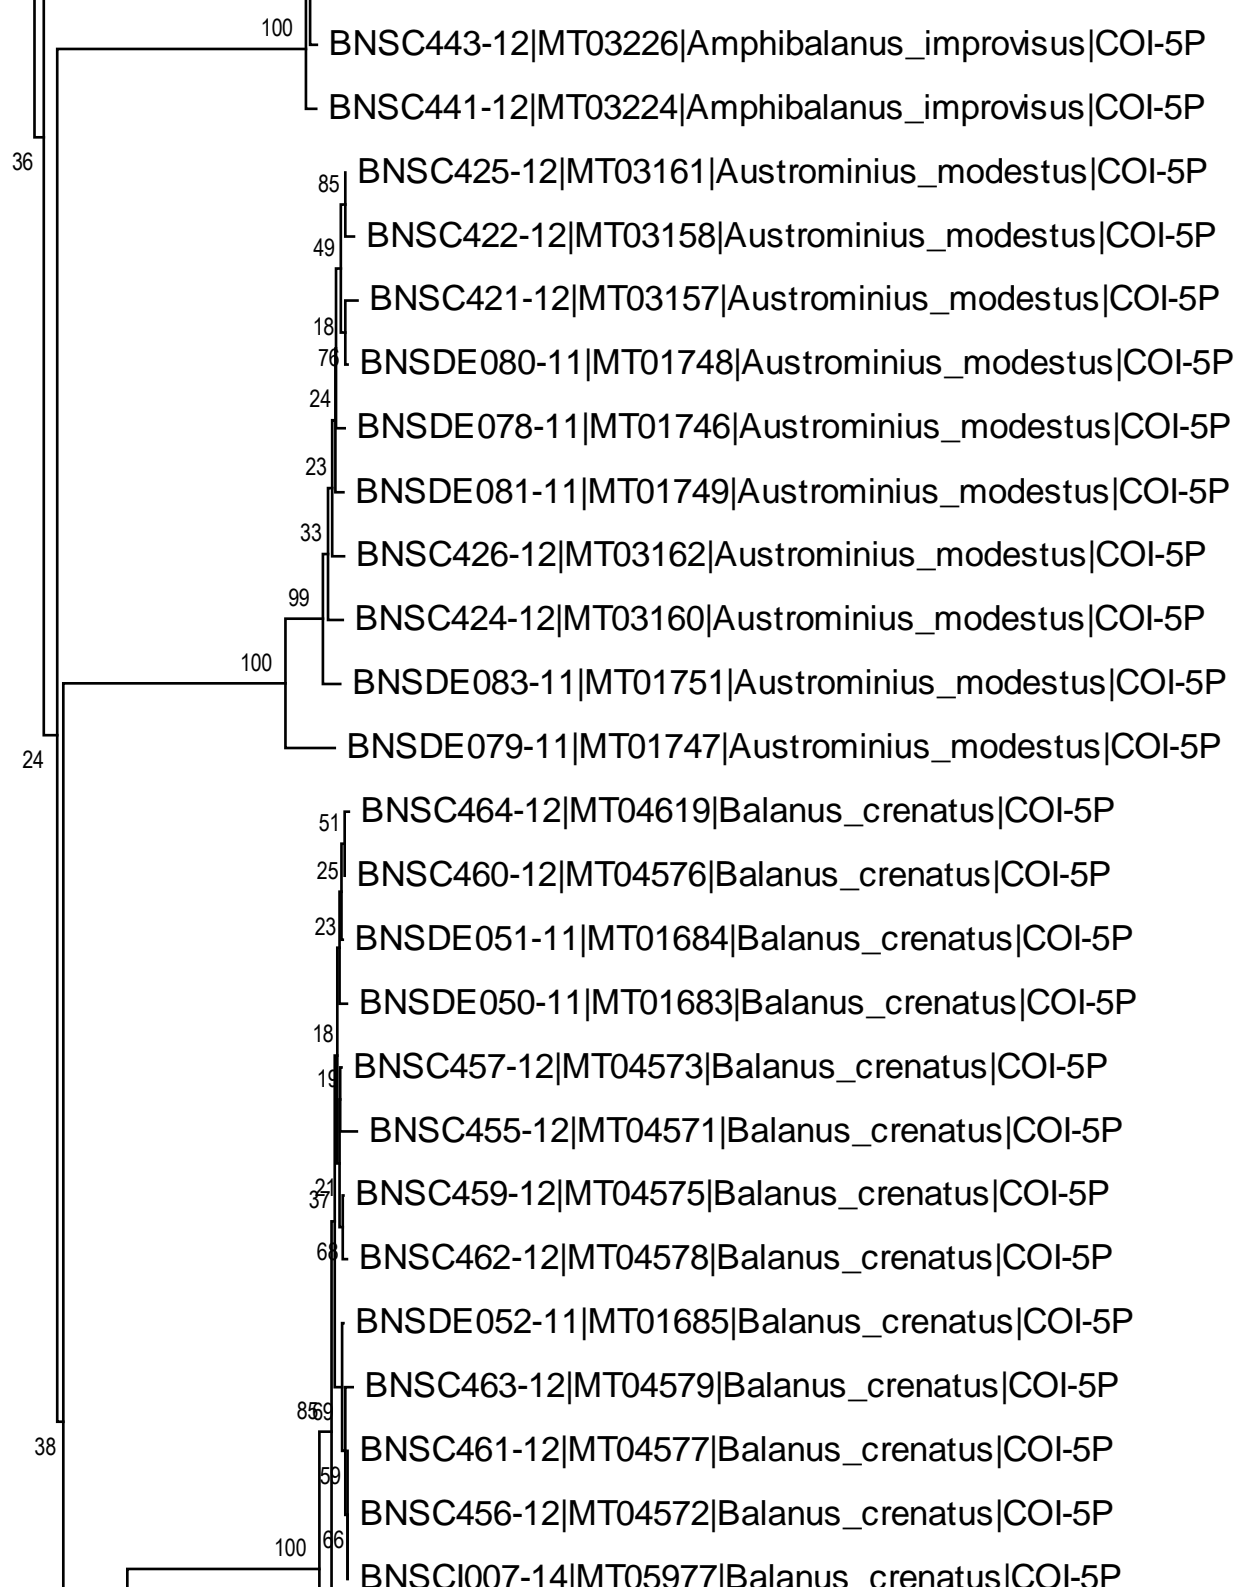

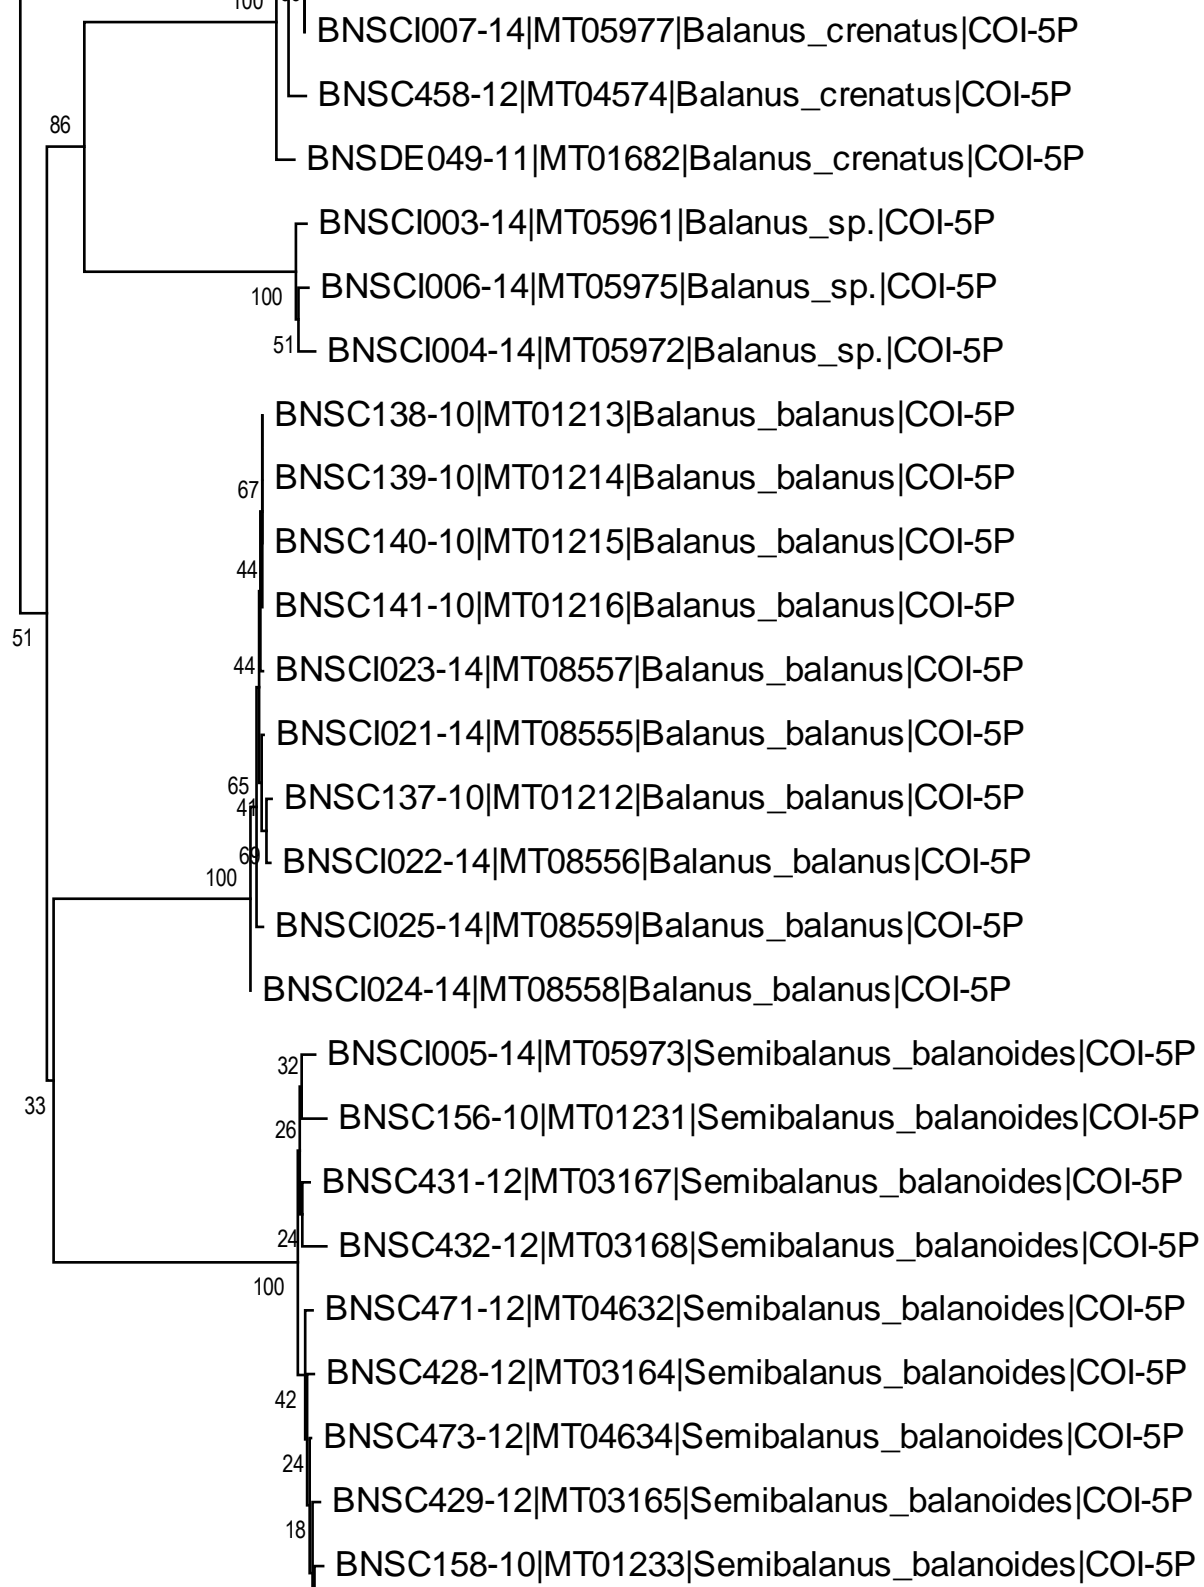

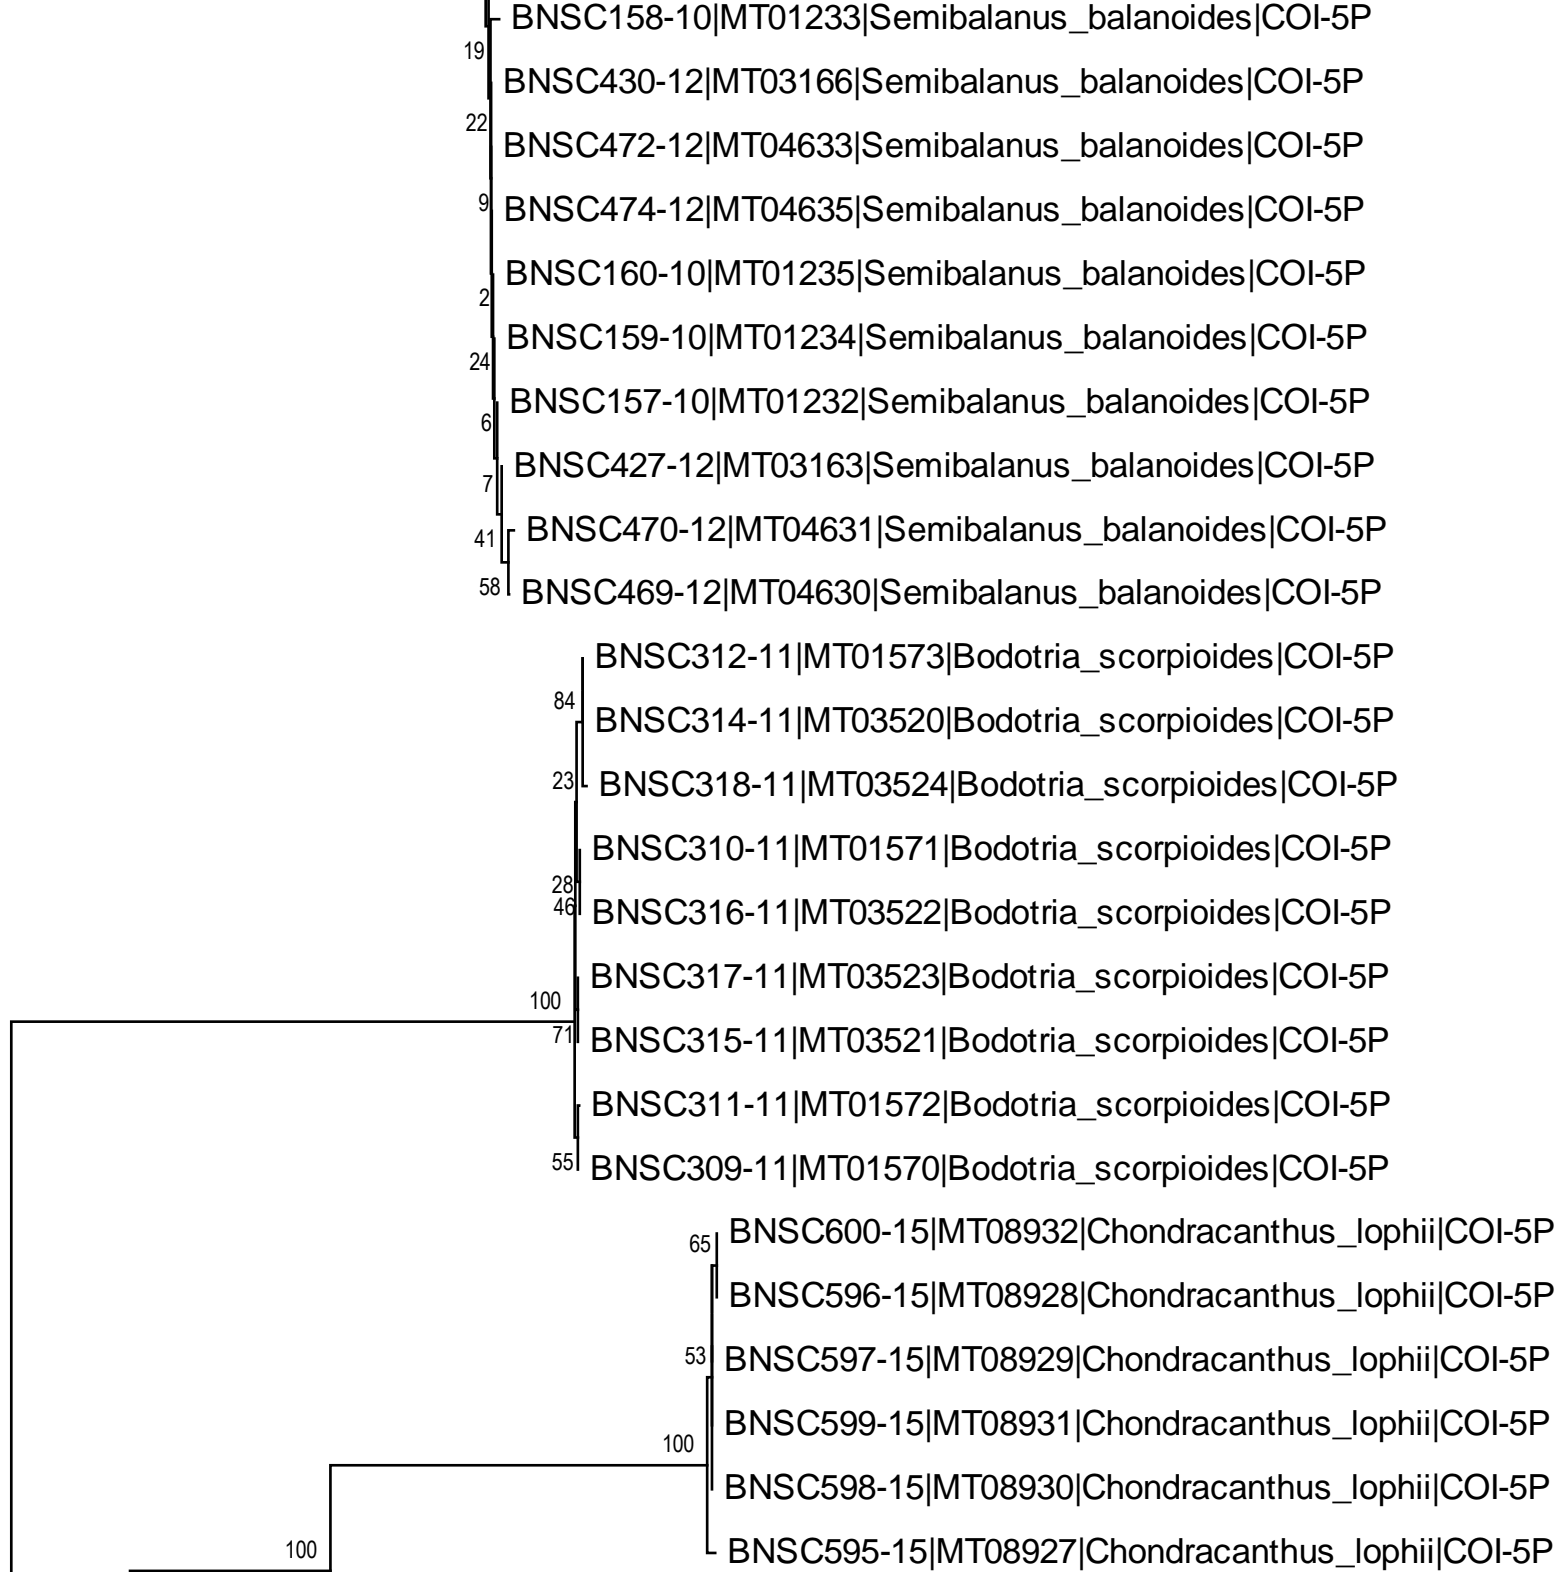



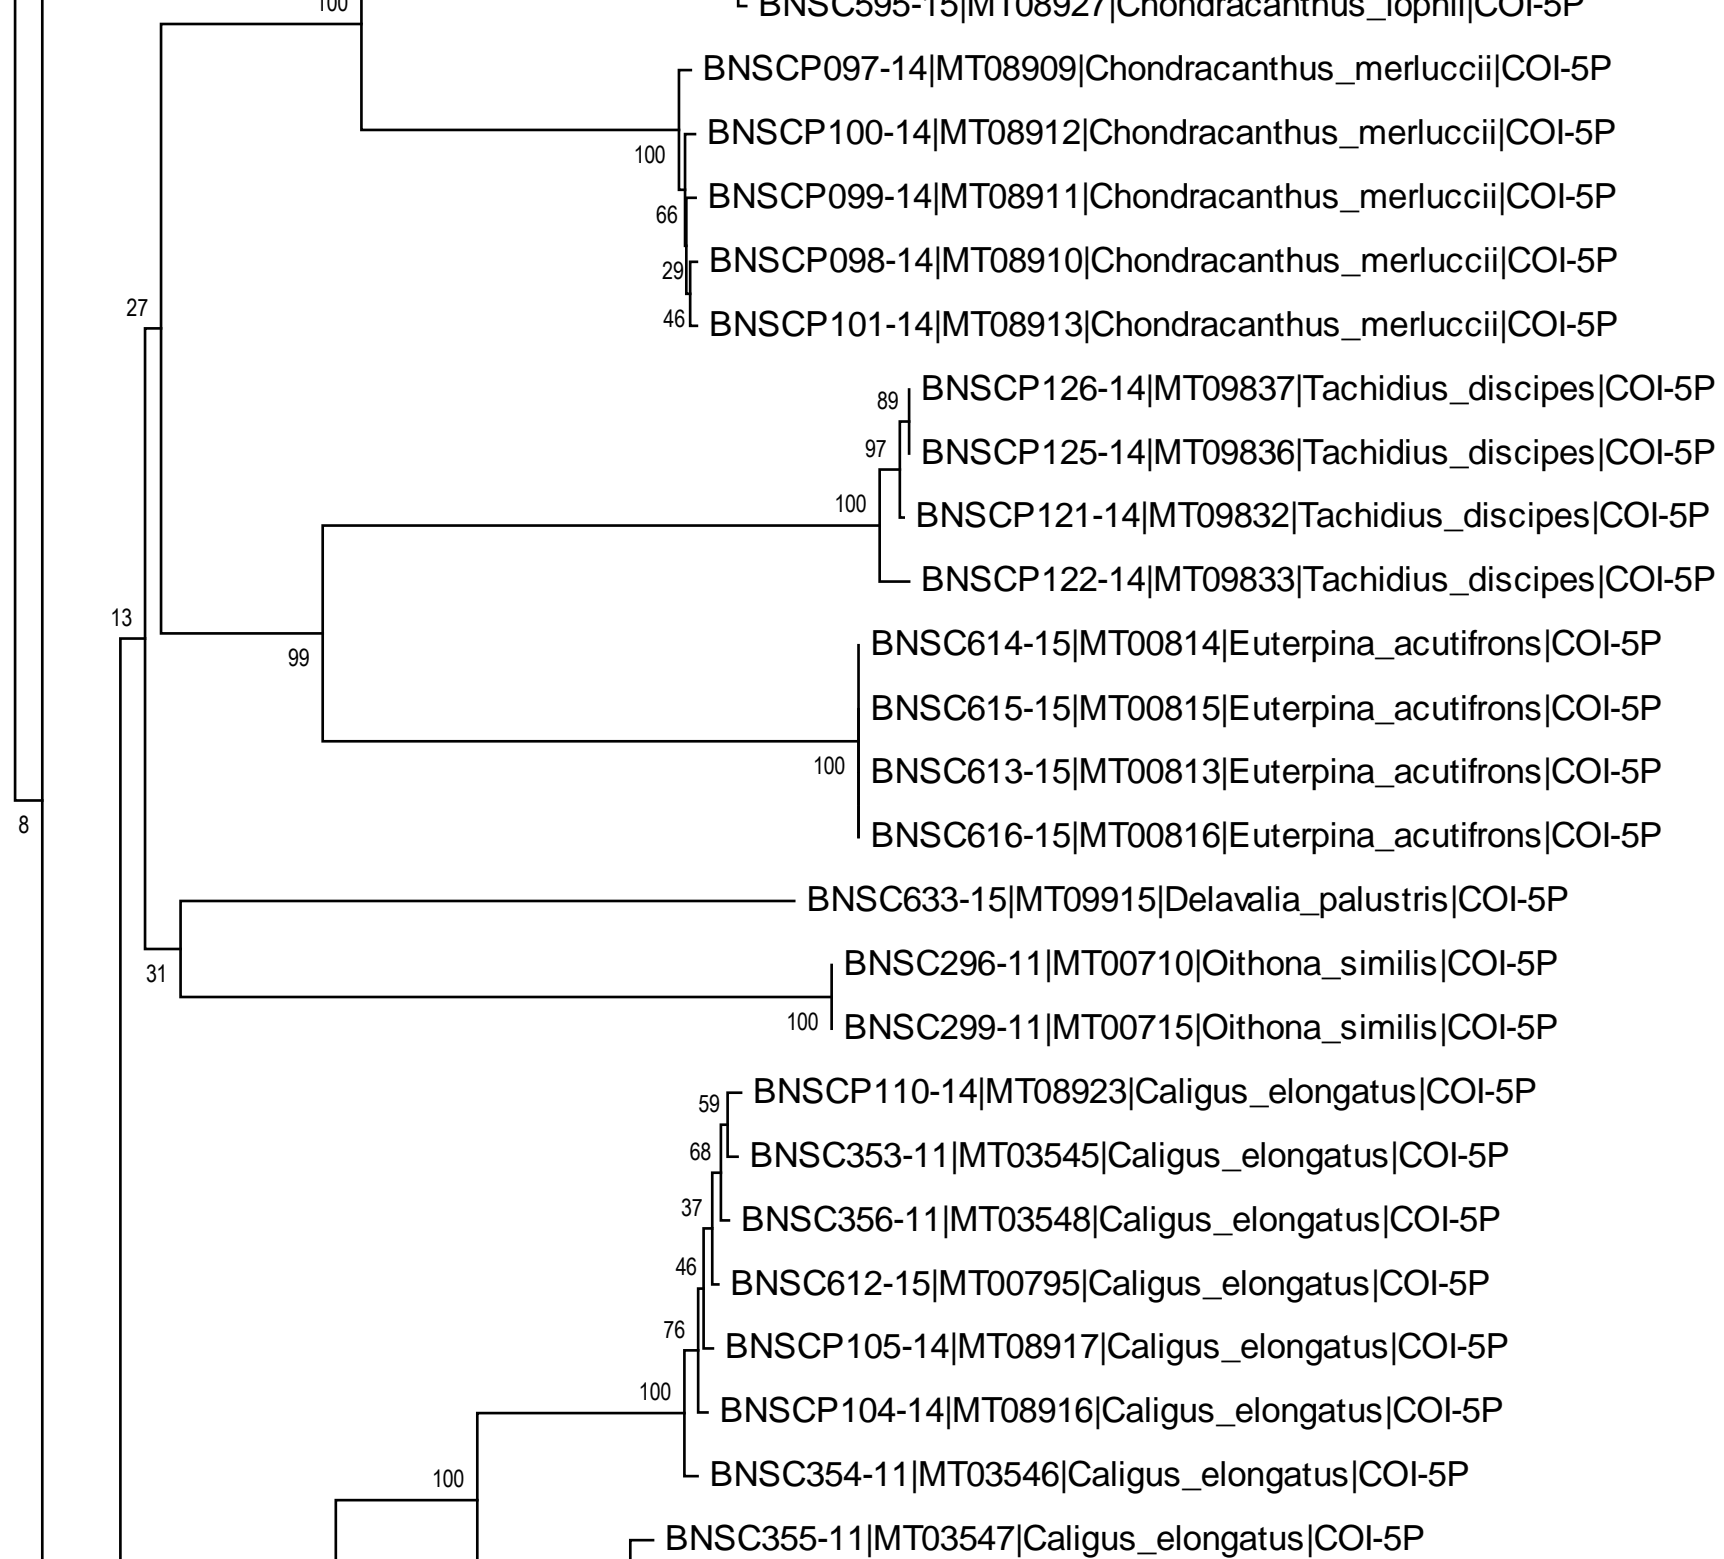

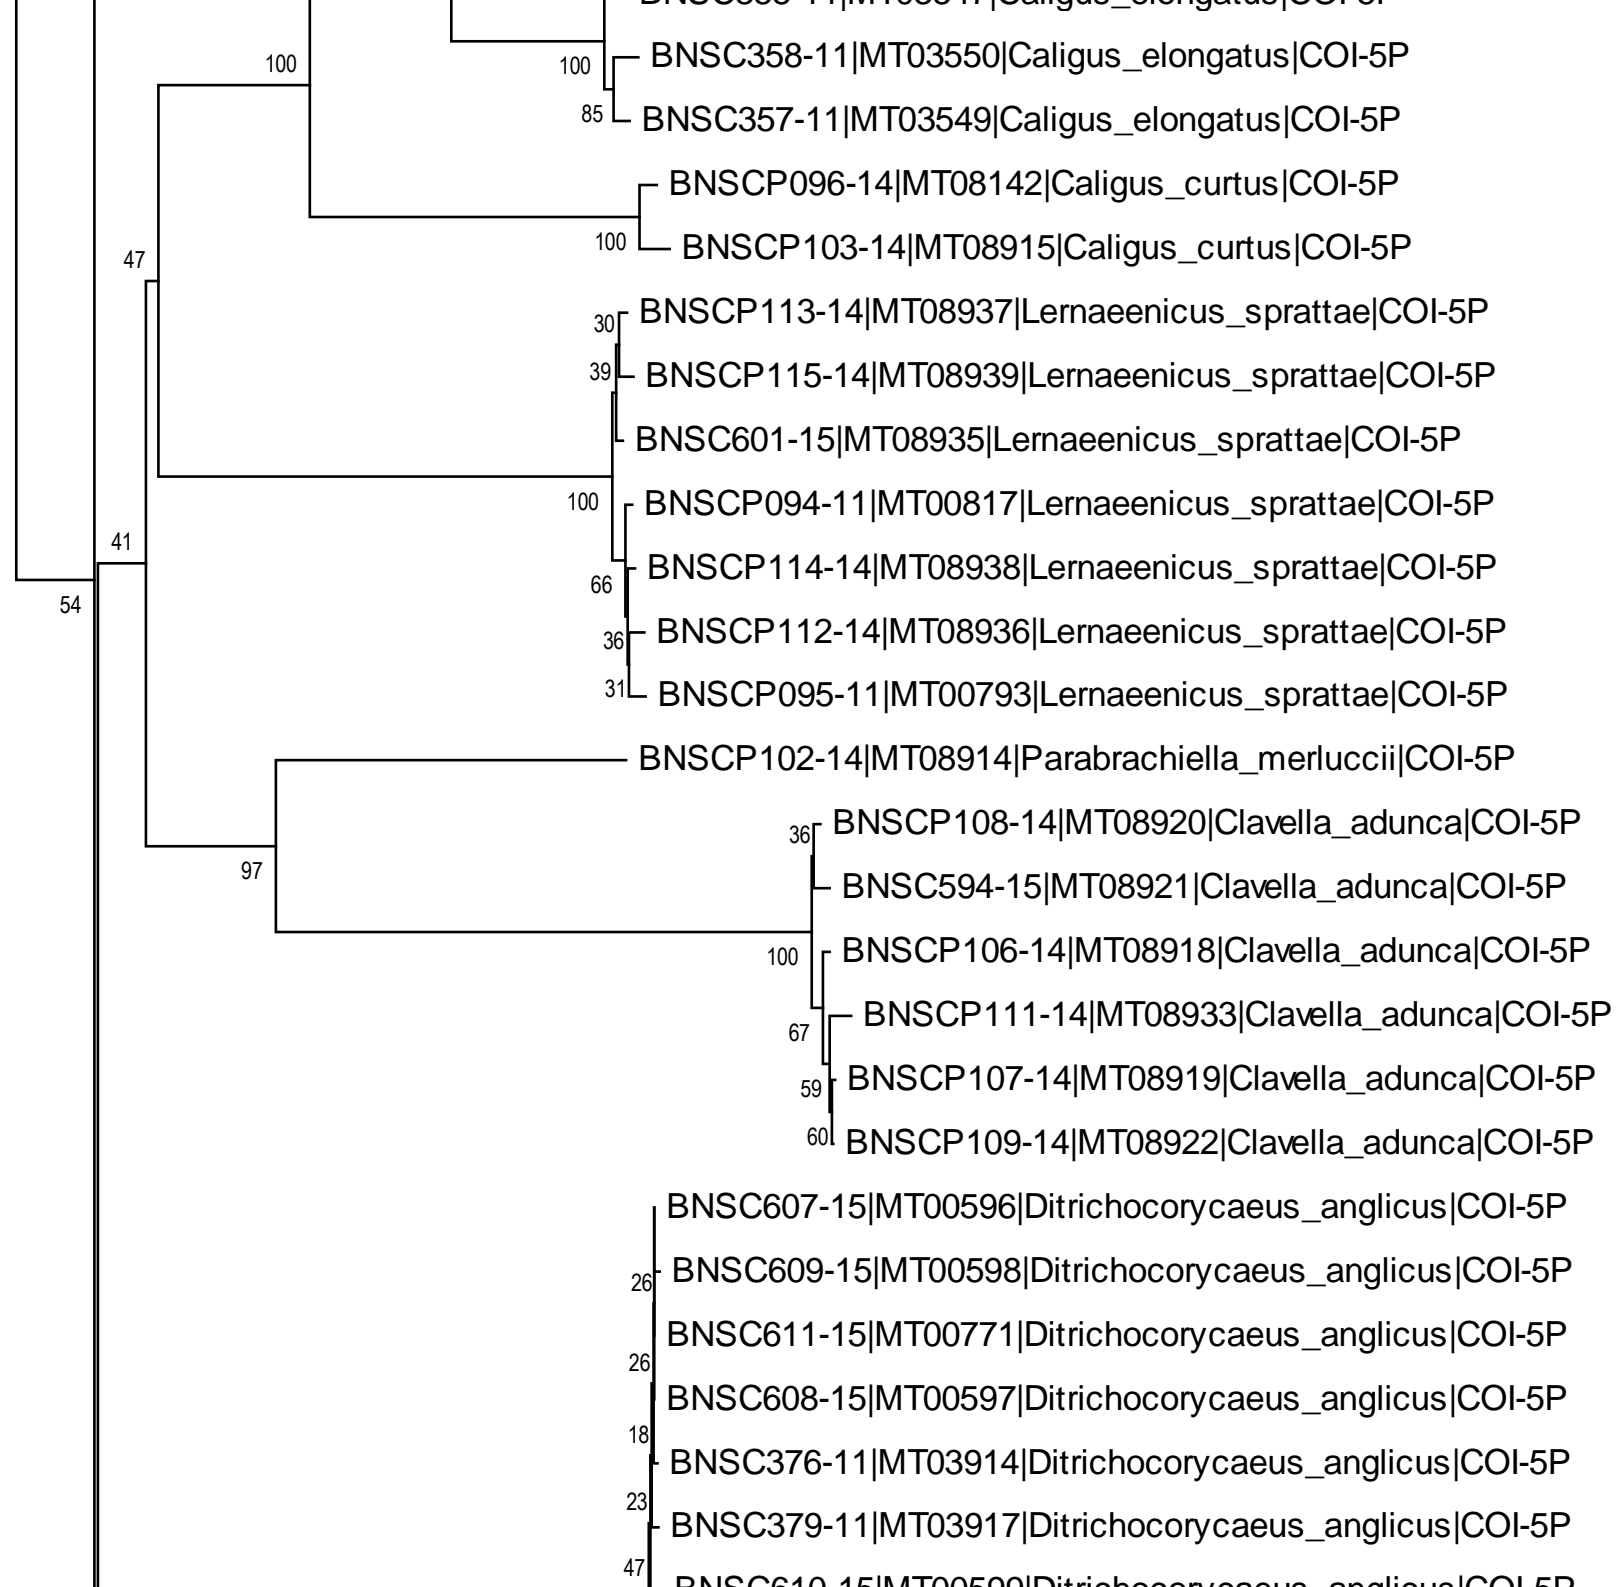

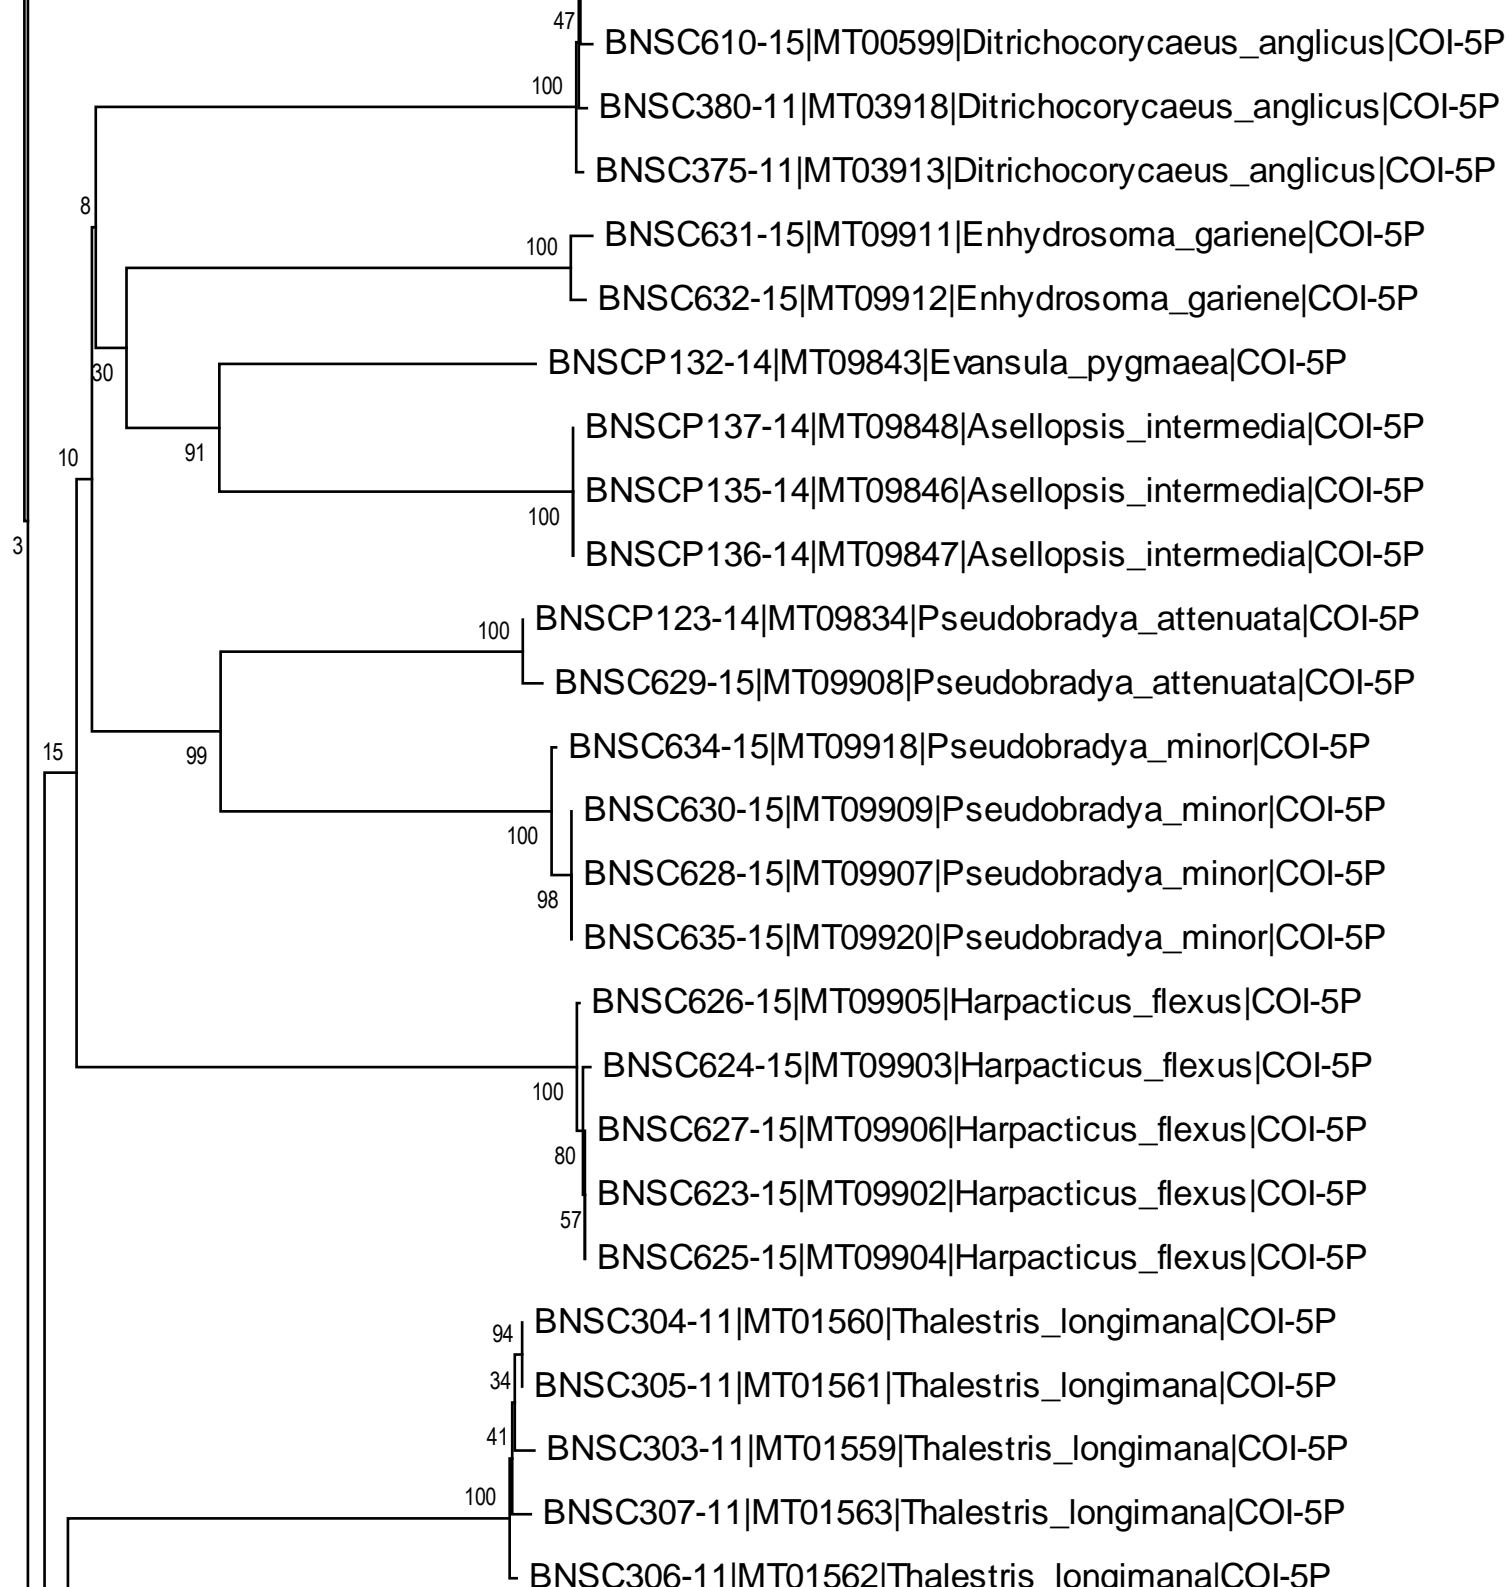

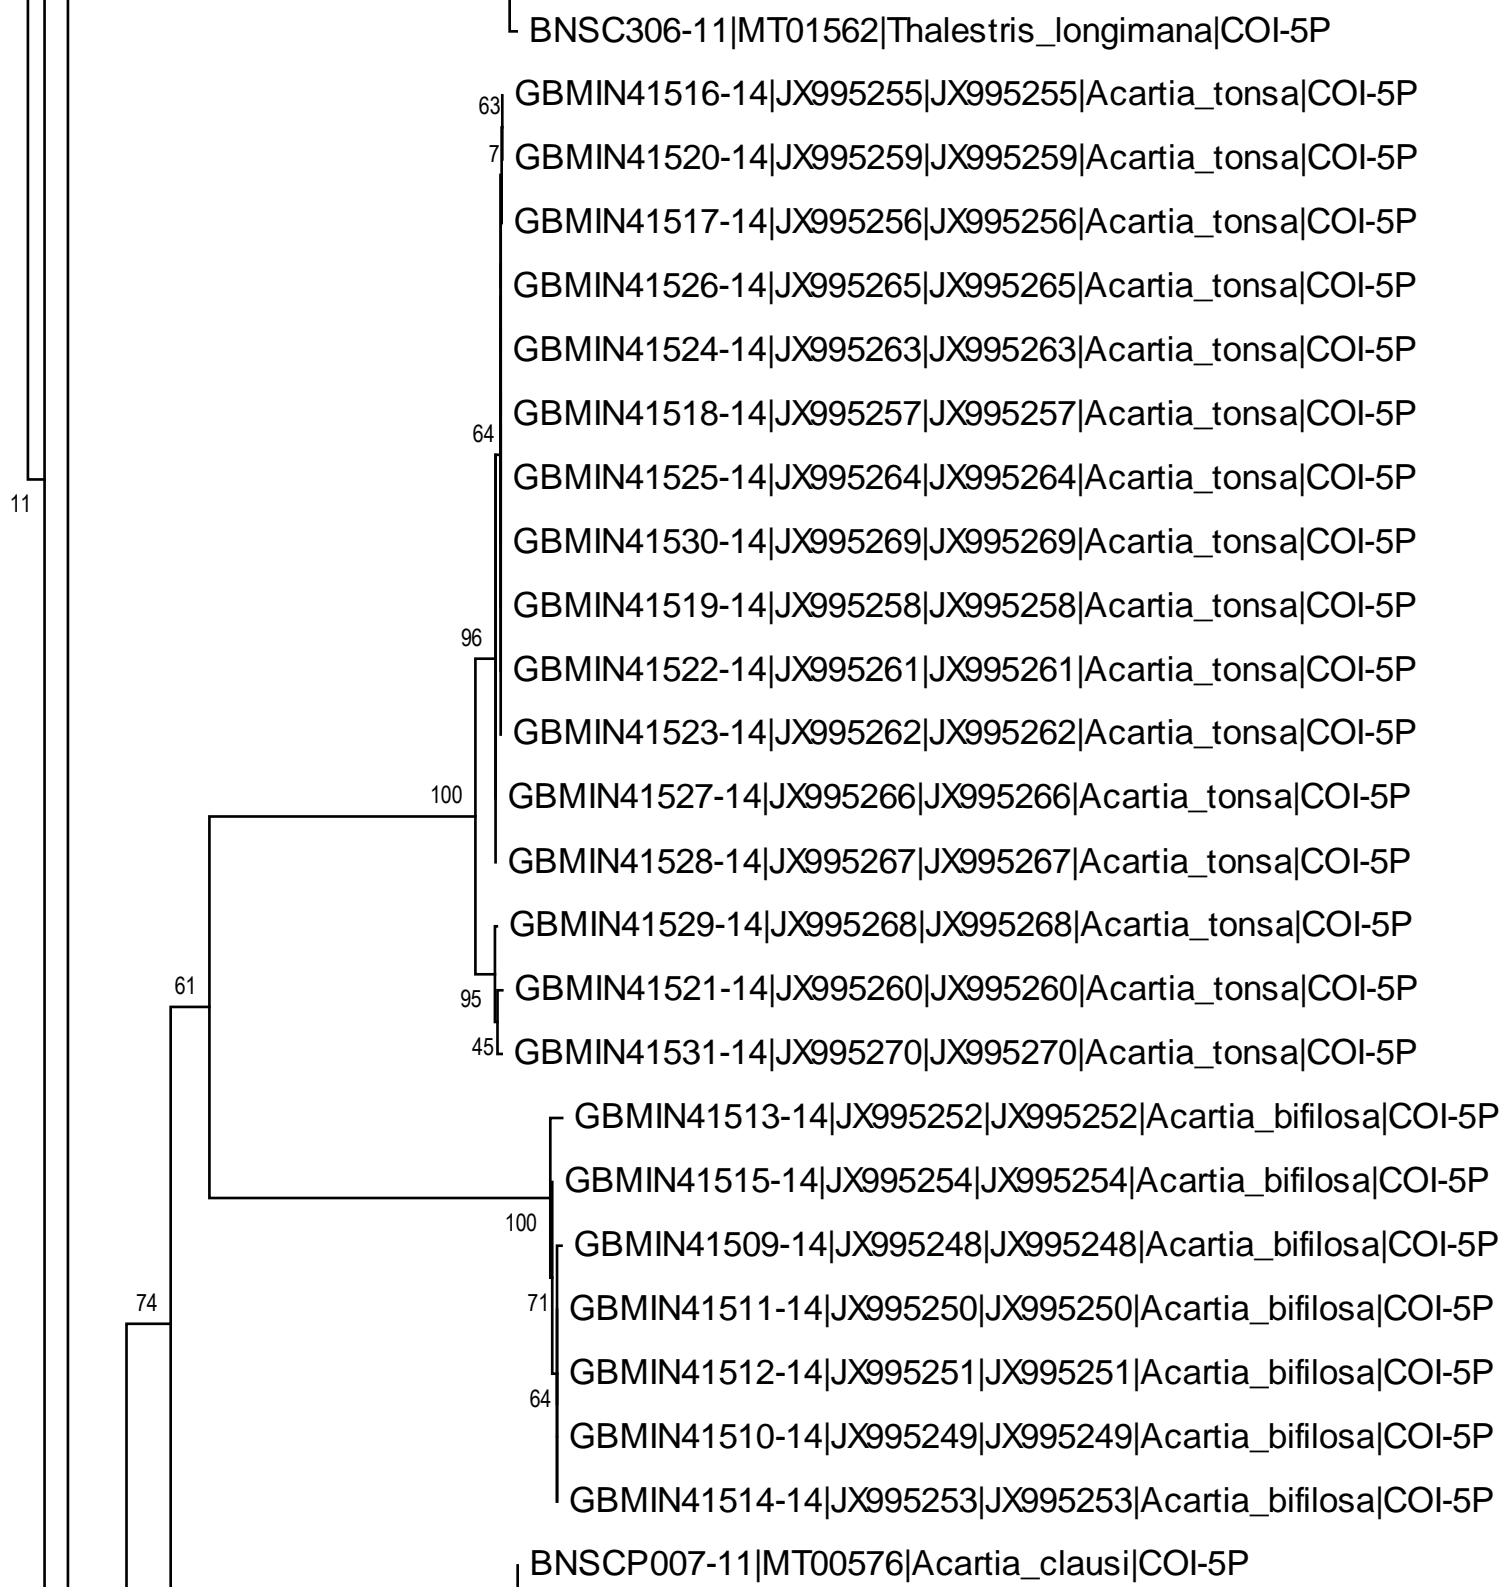

31

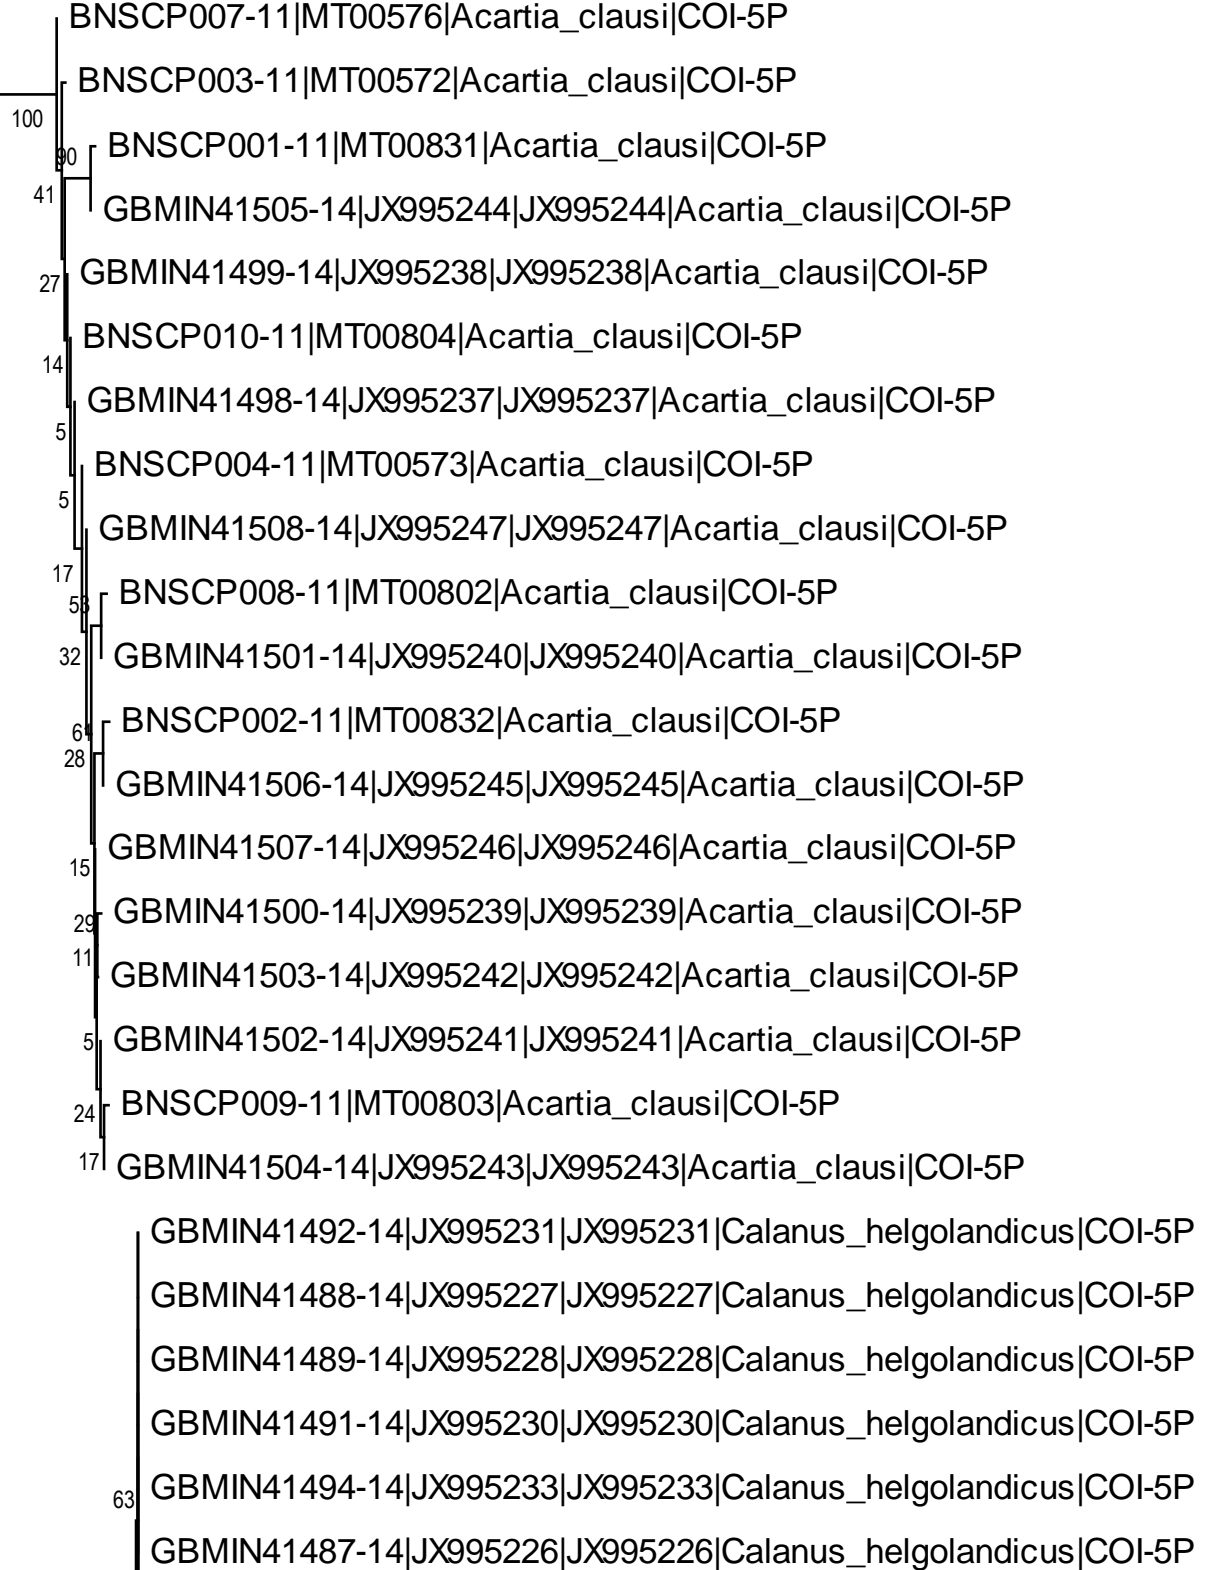

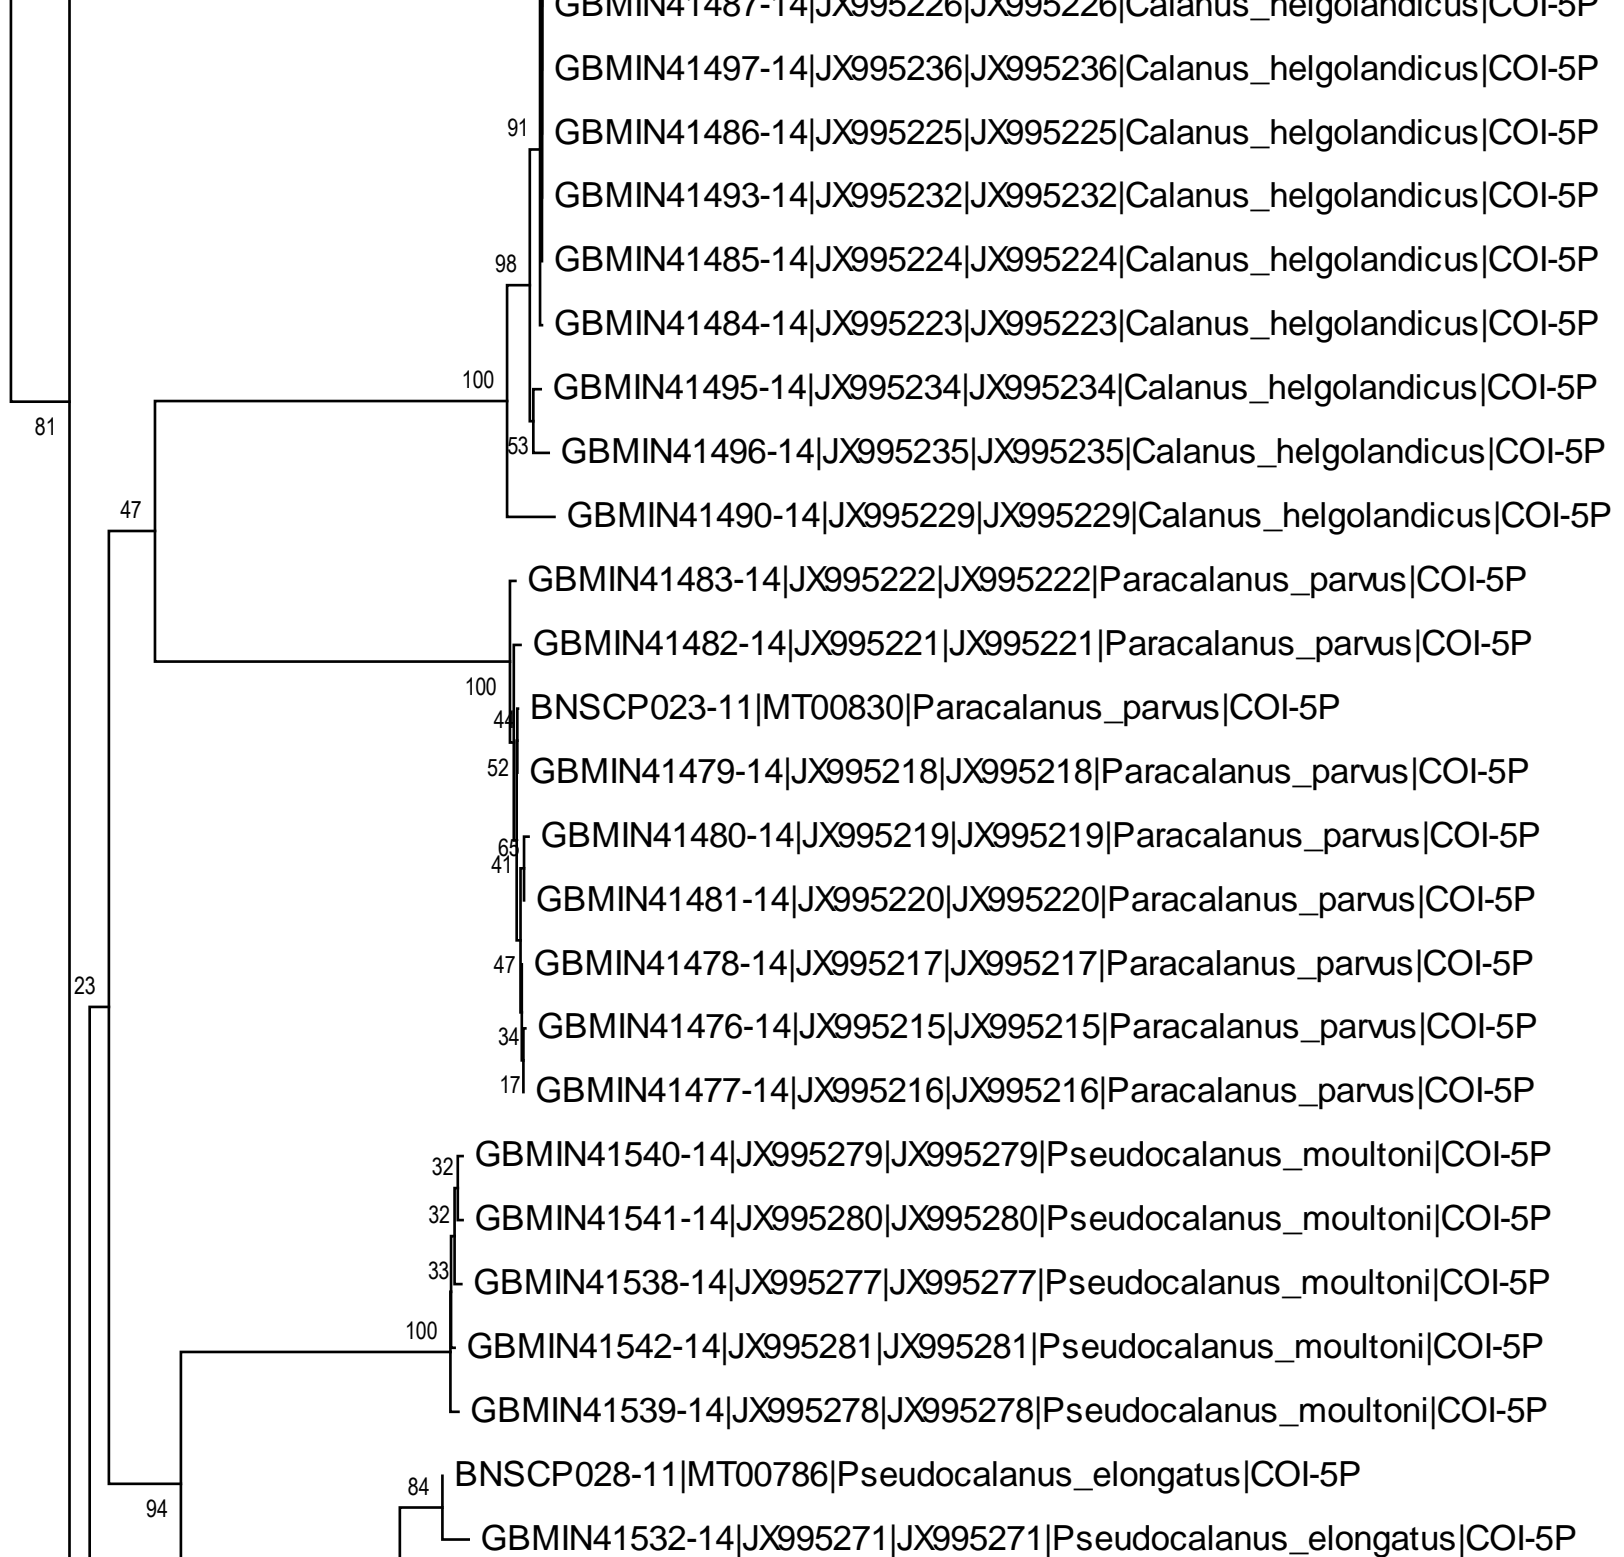

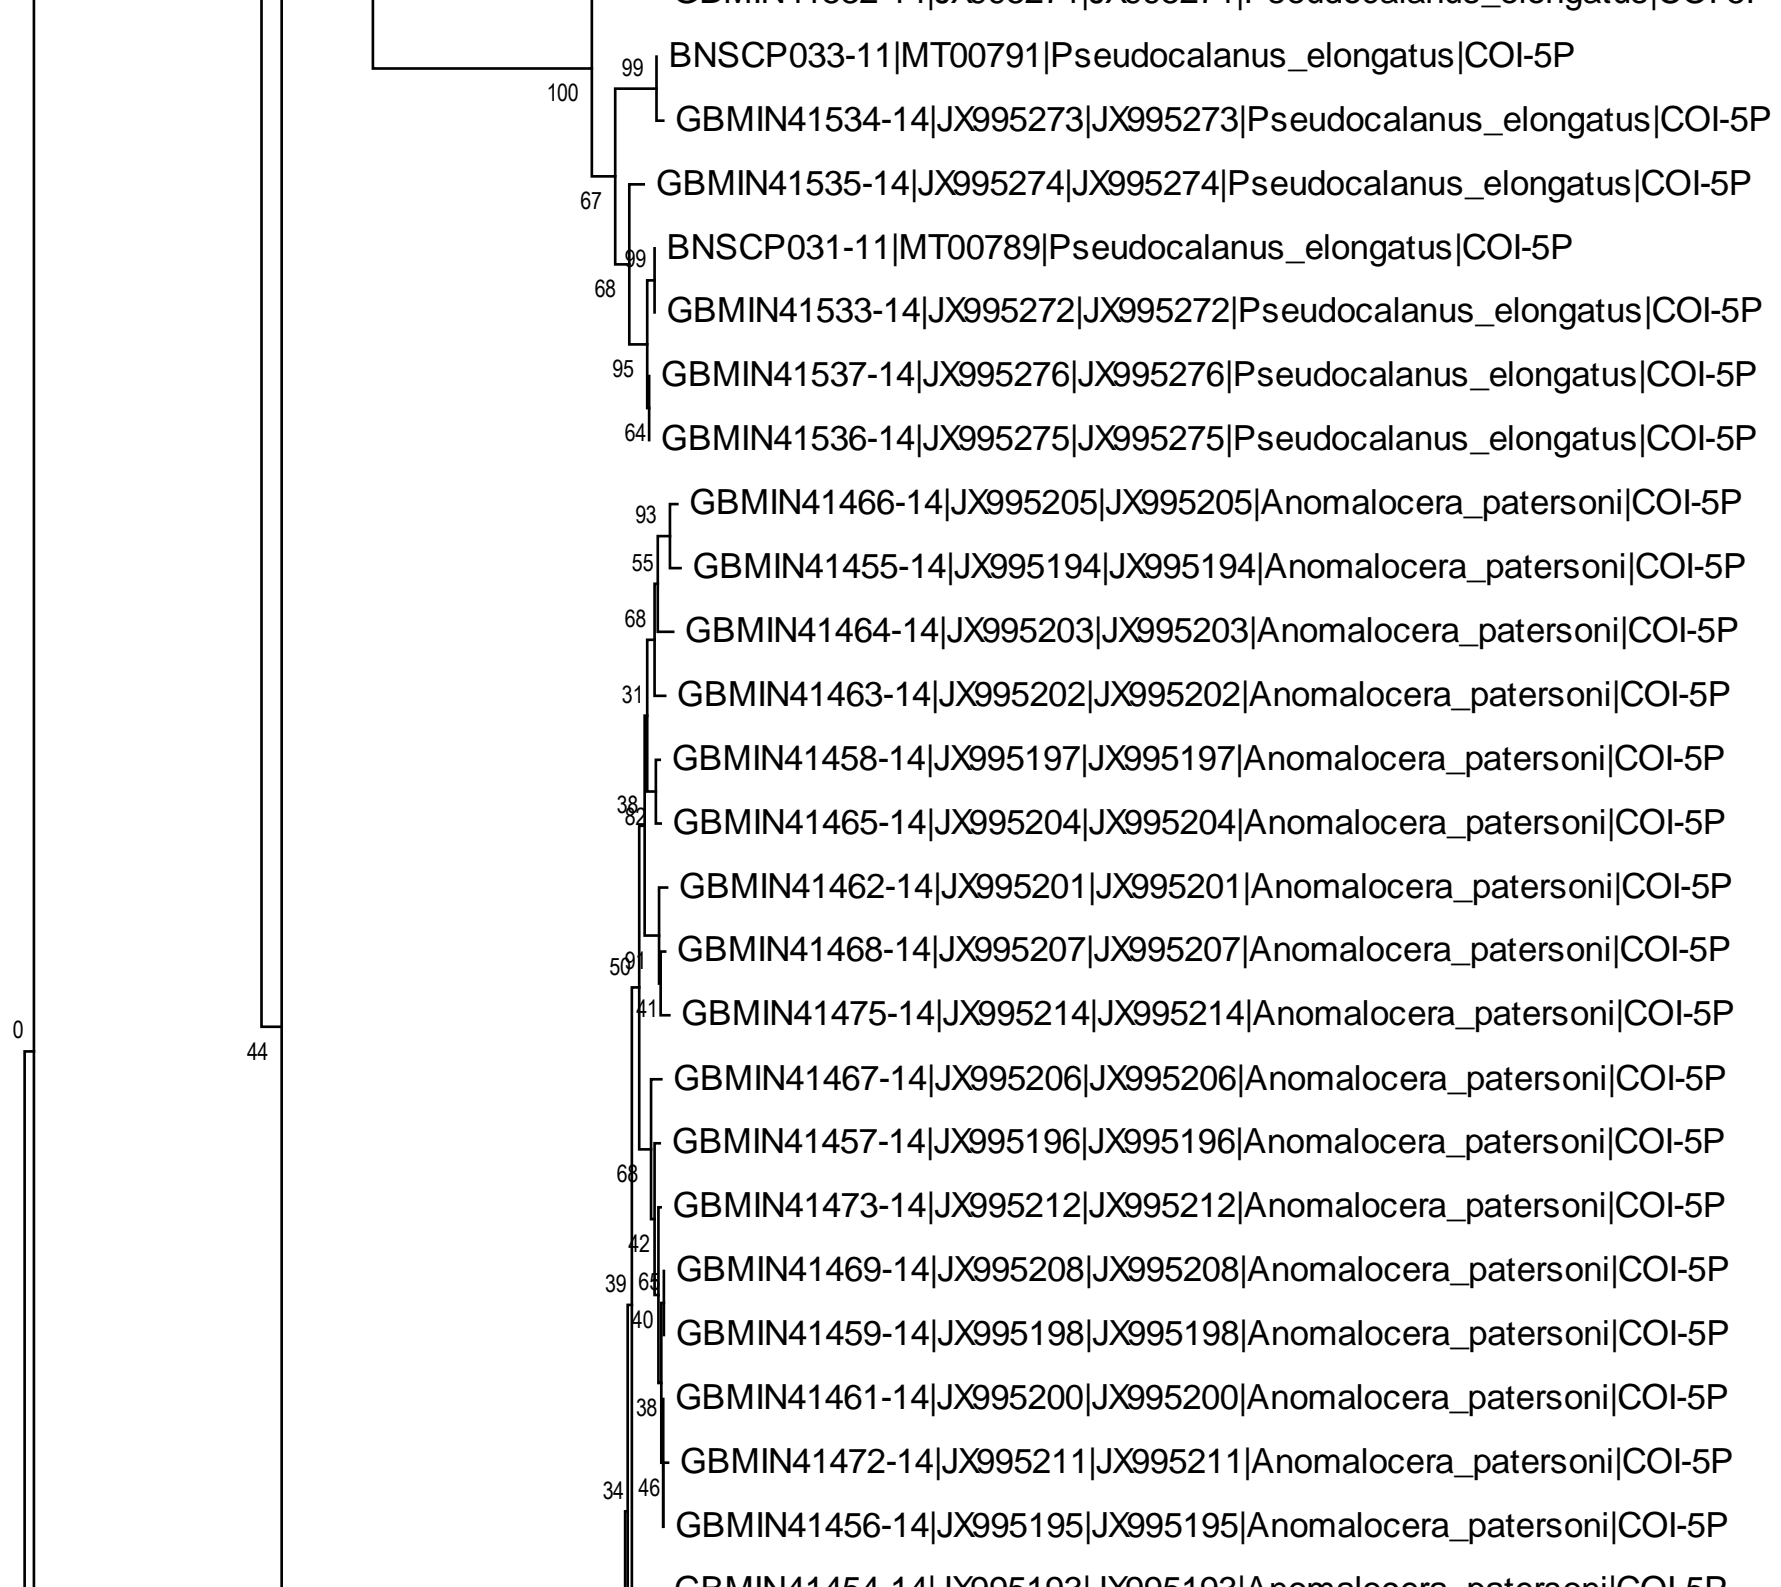

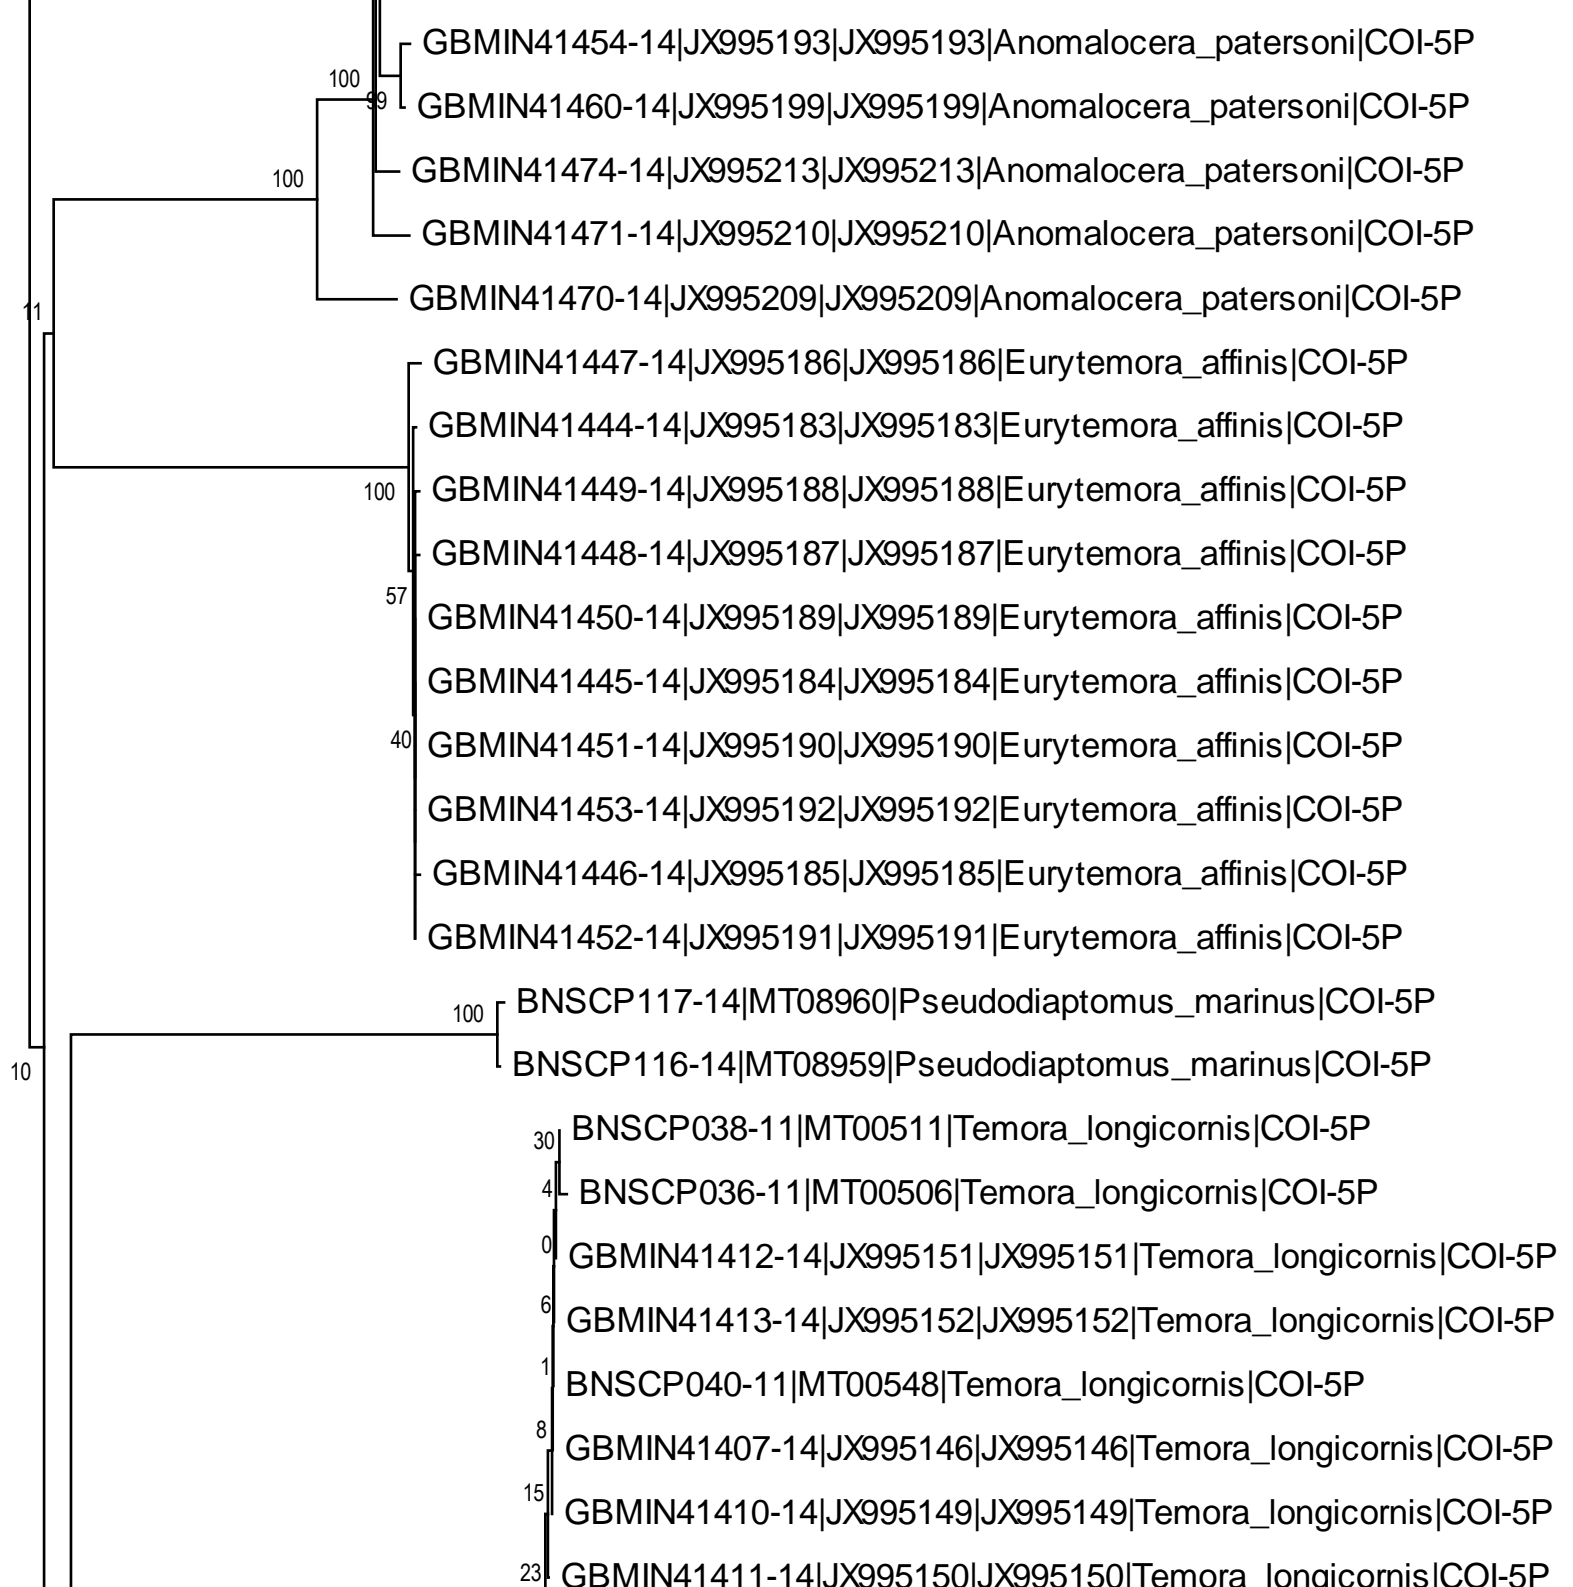



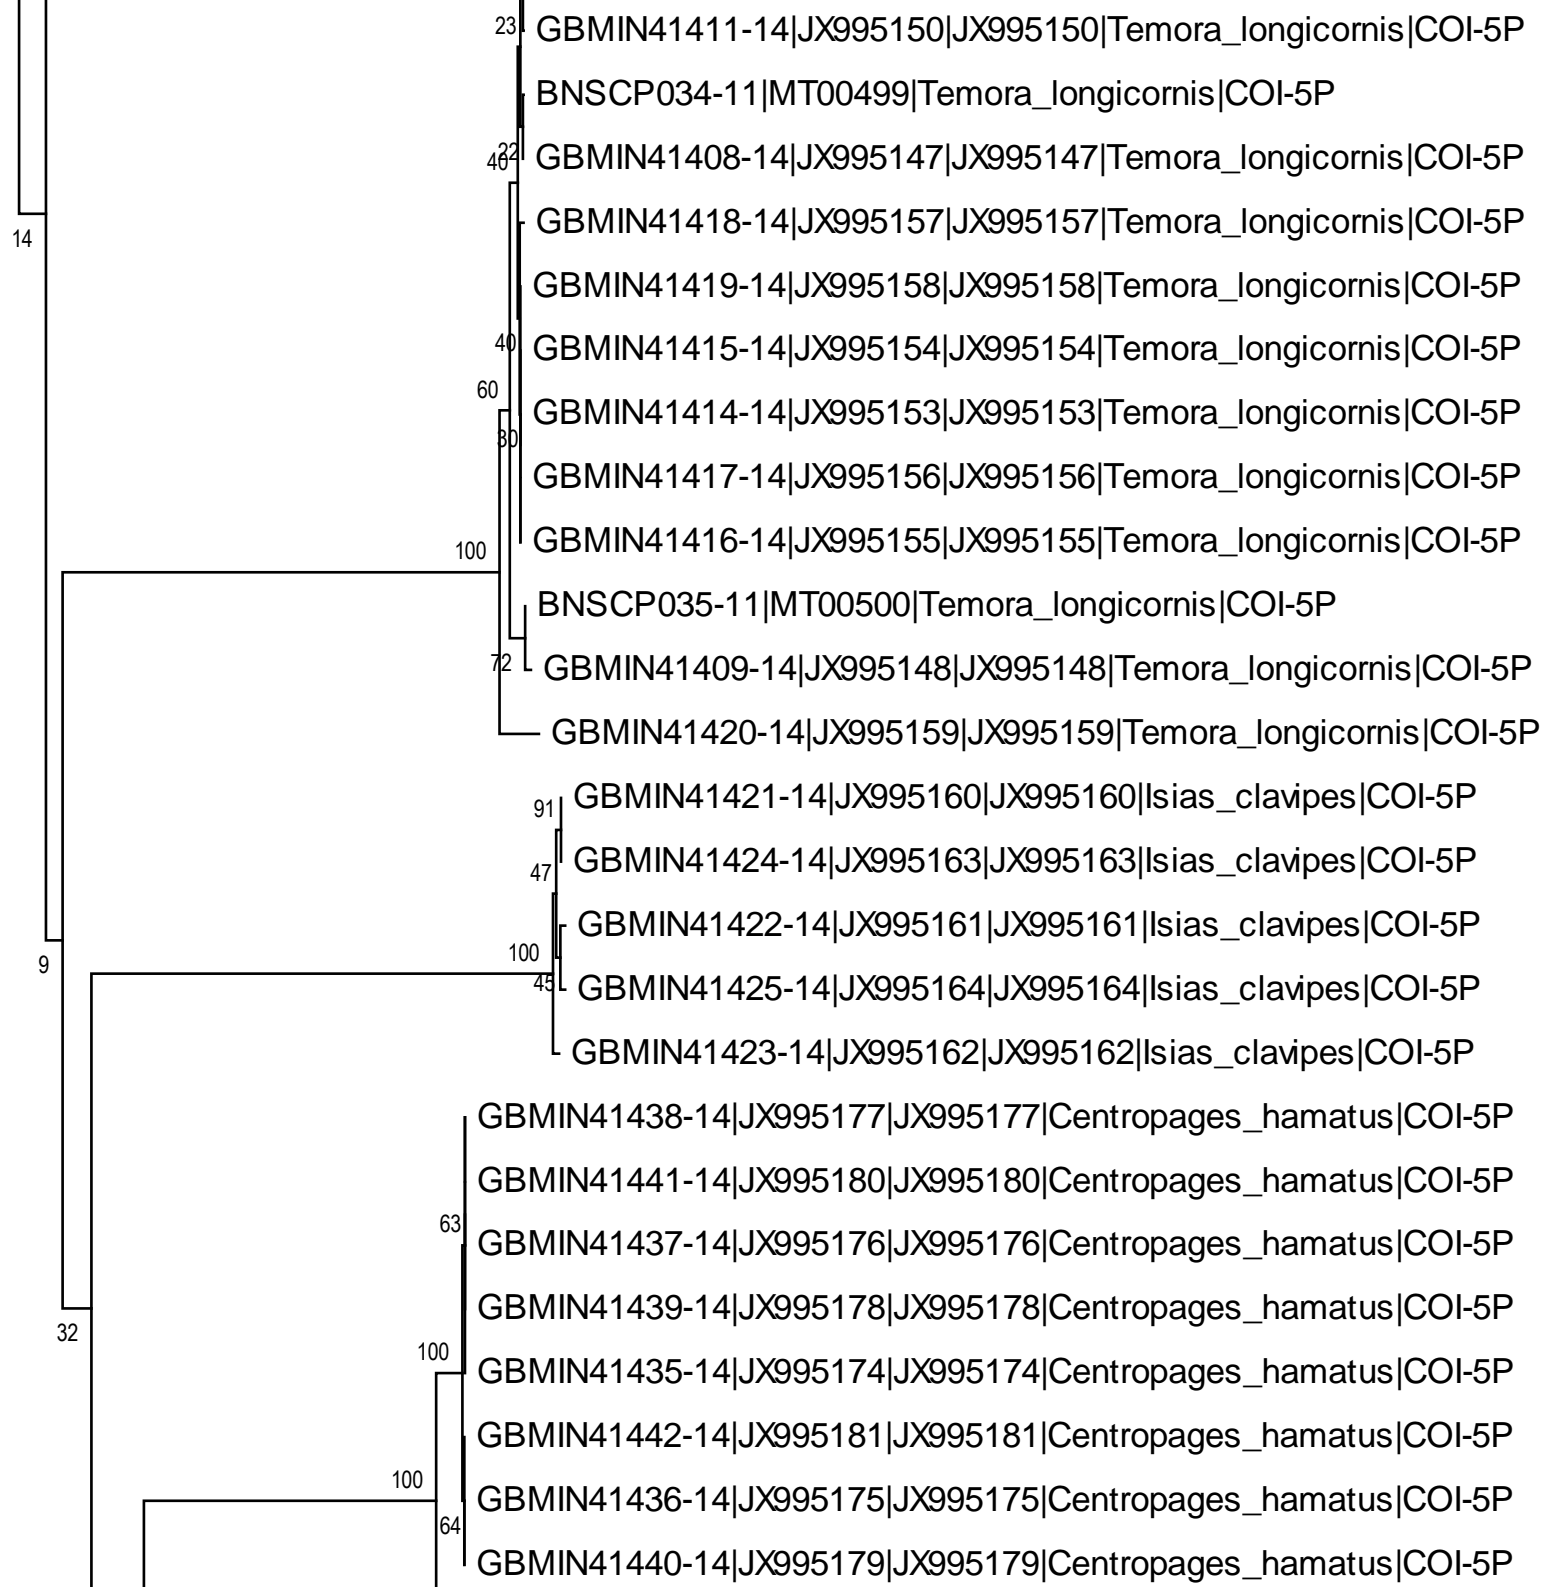

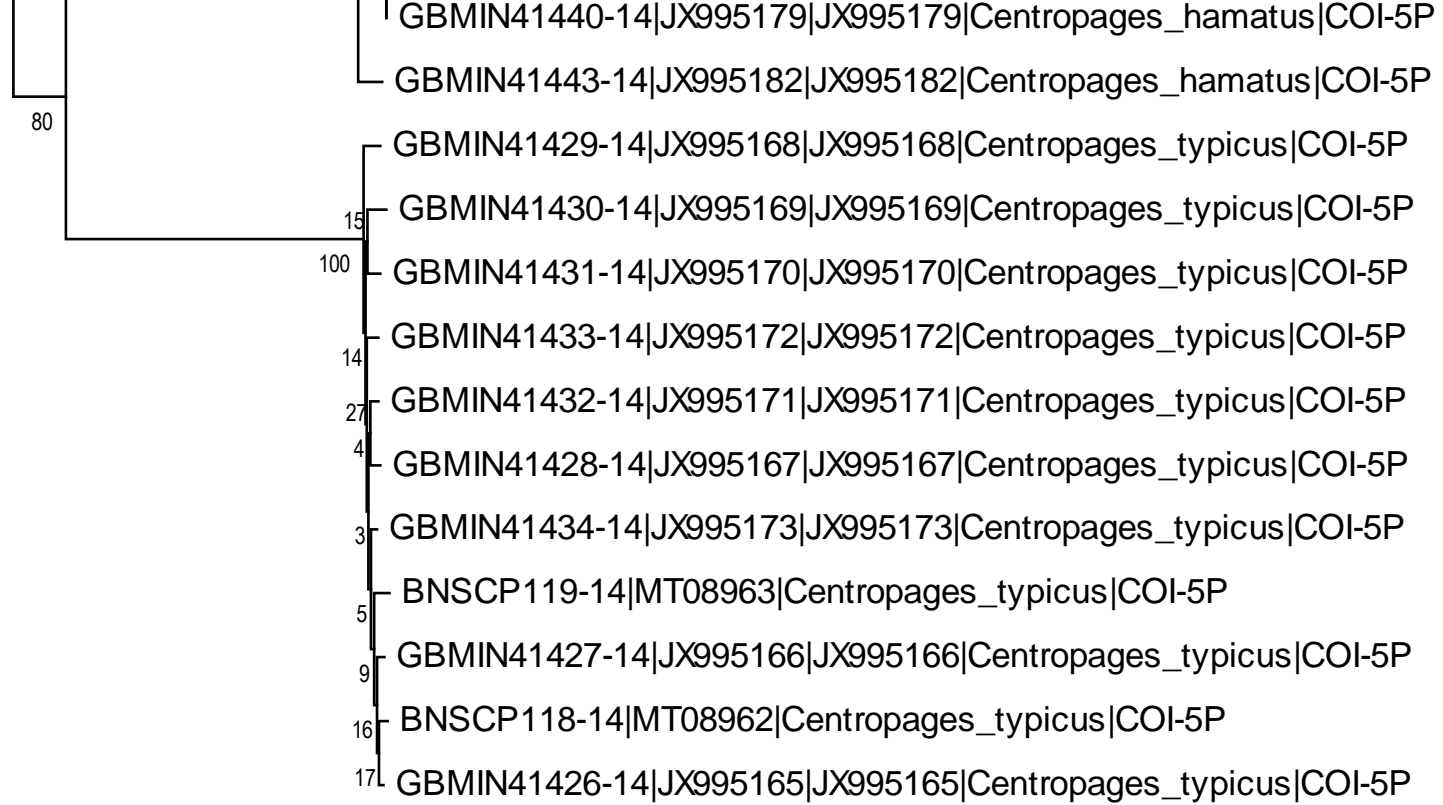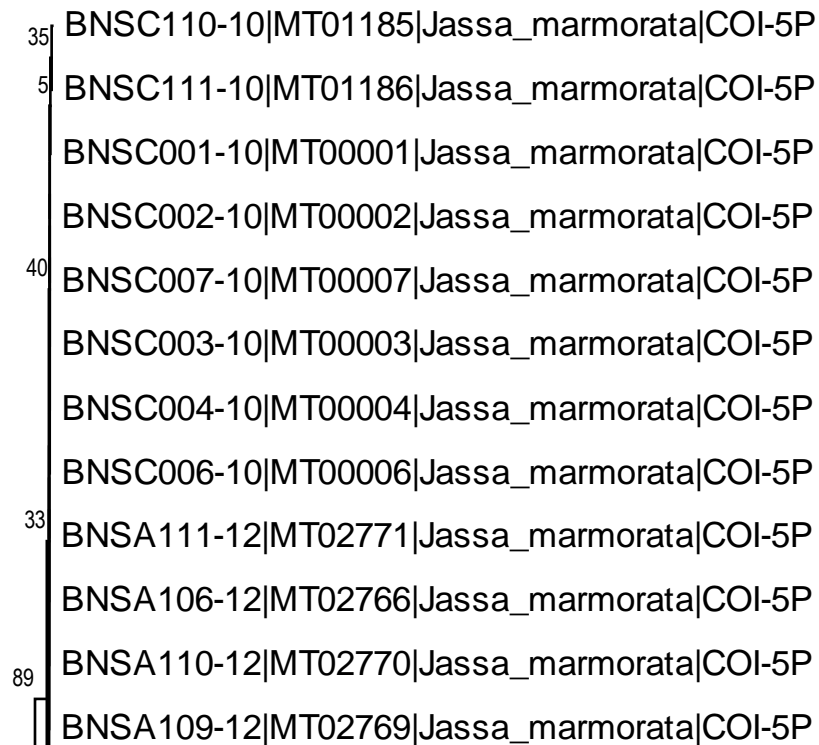

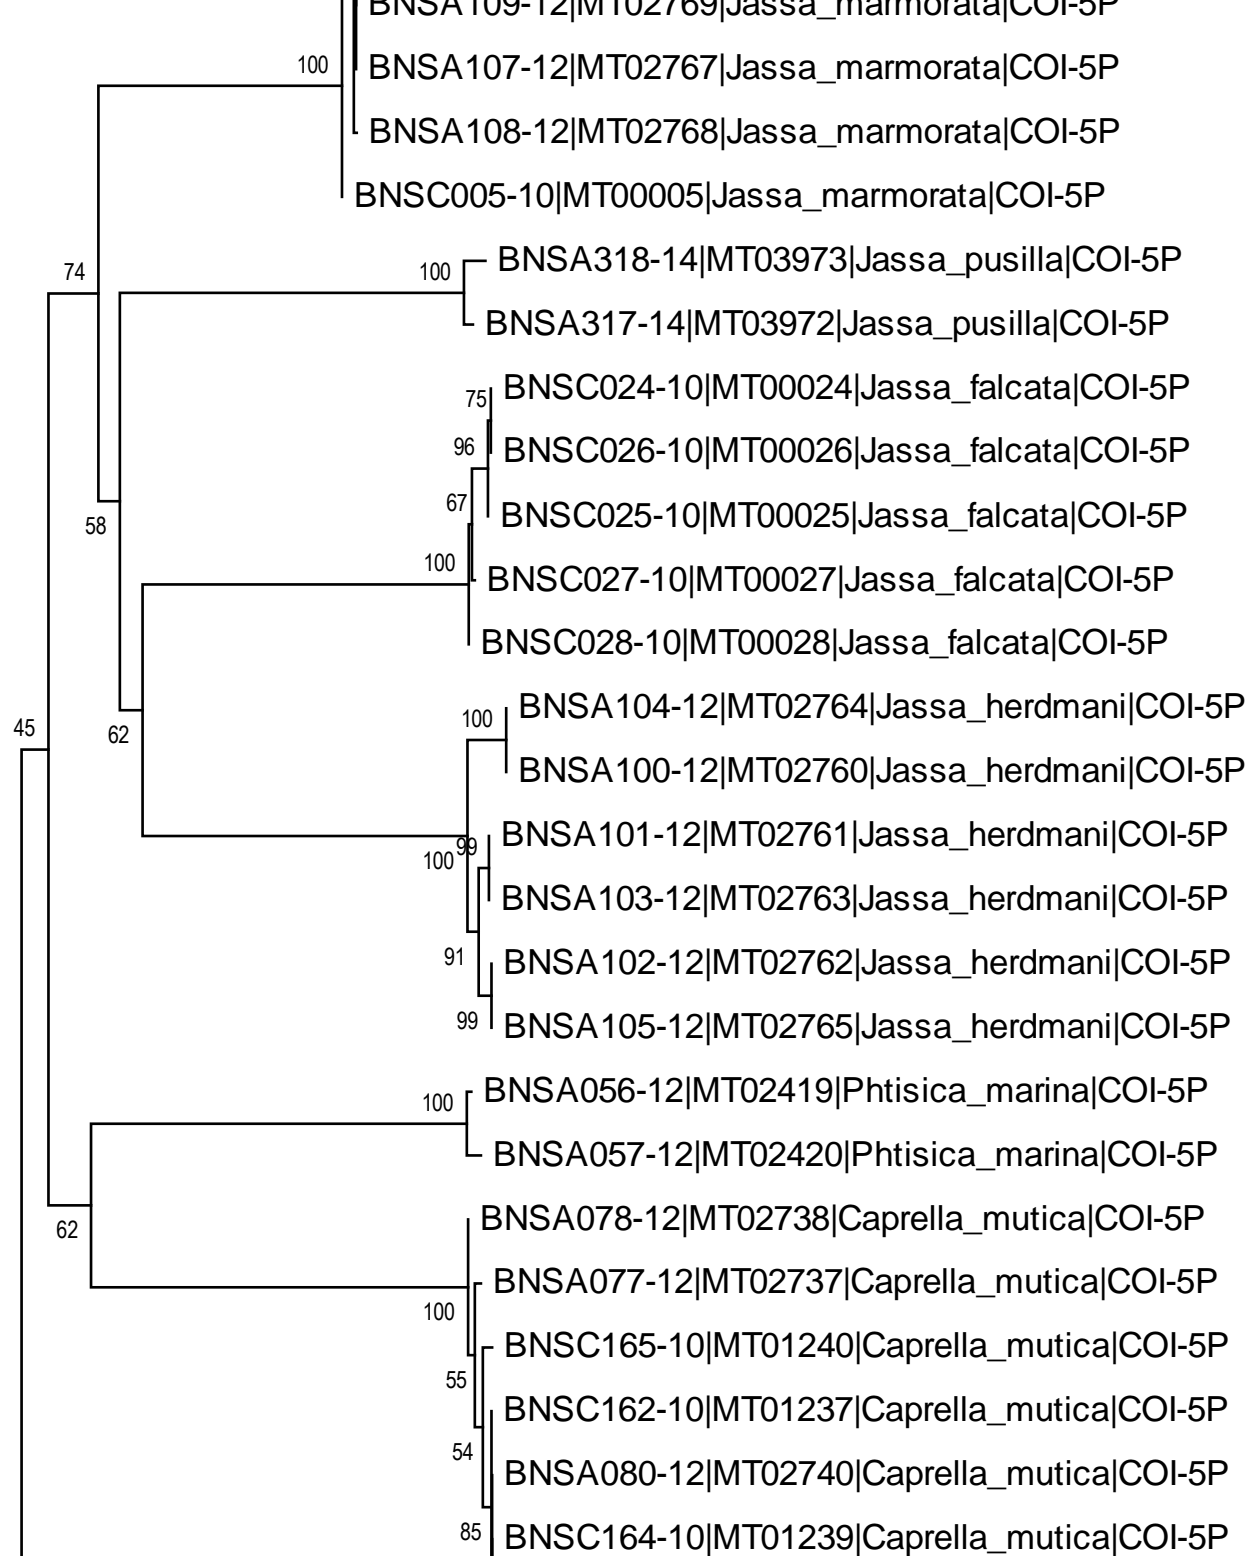

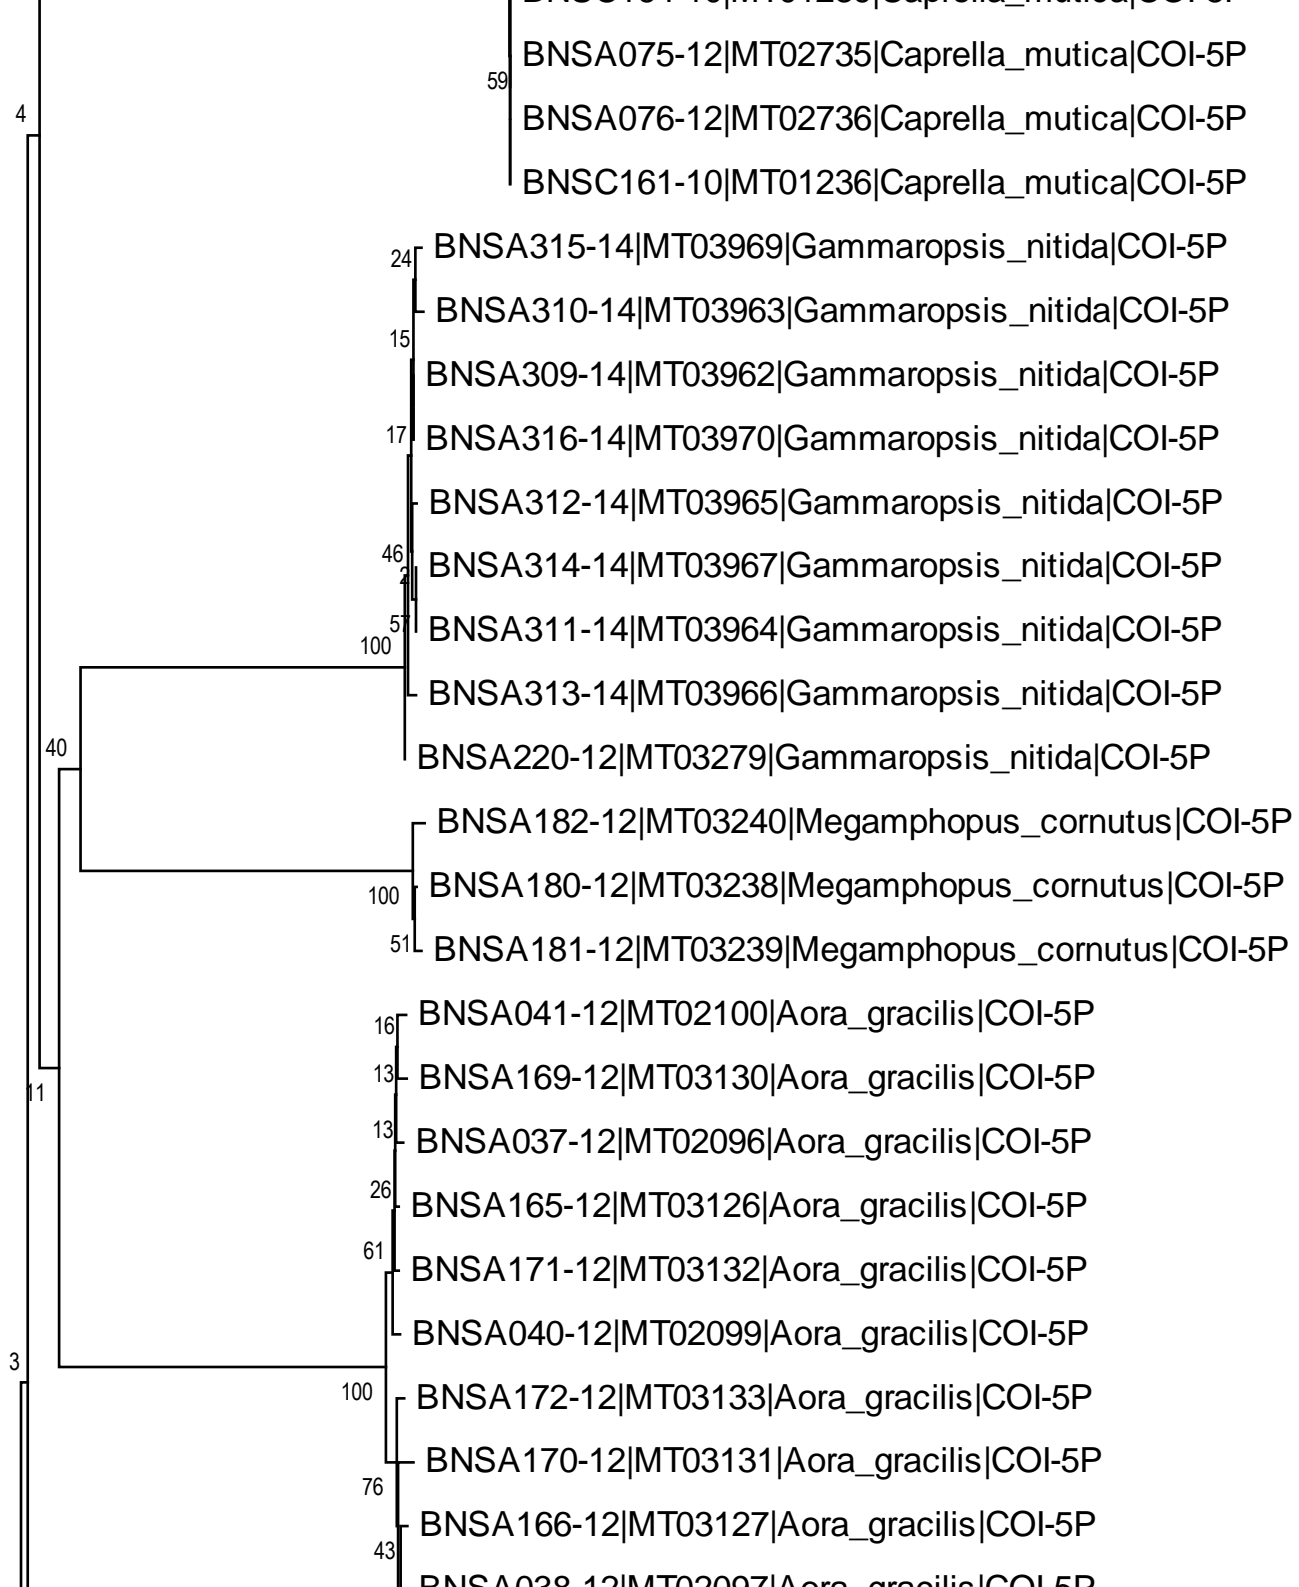

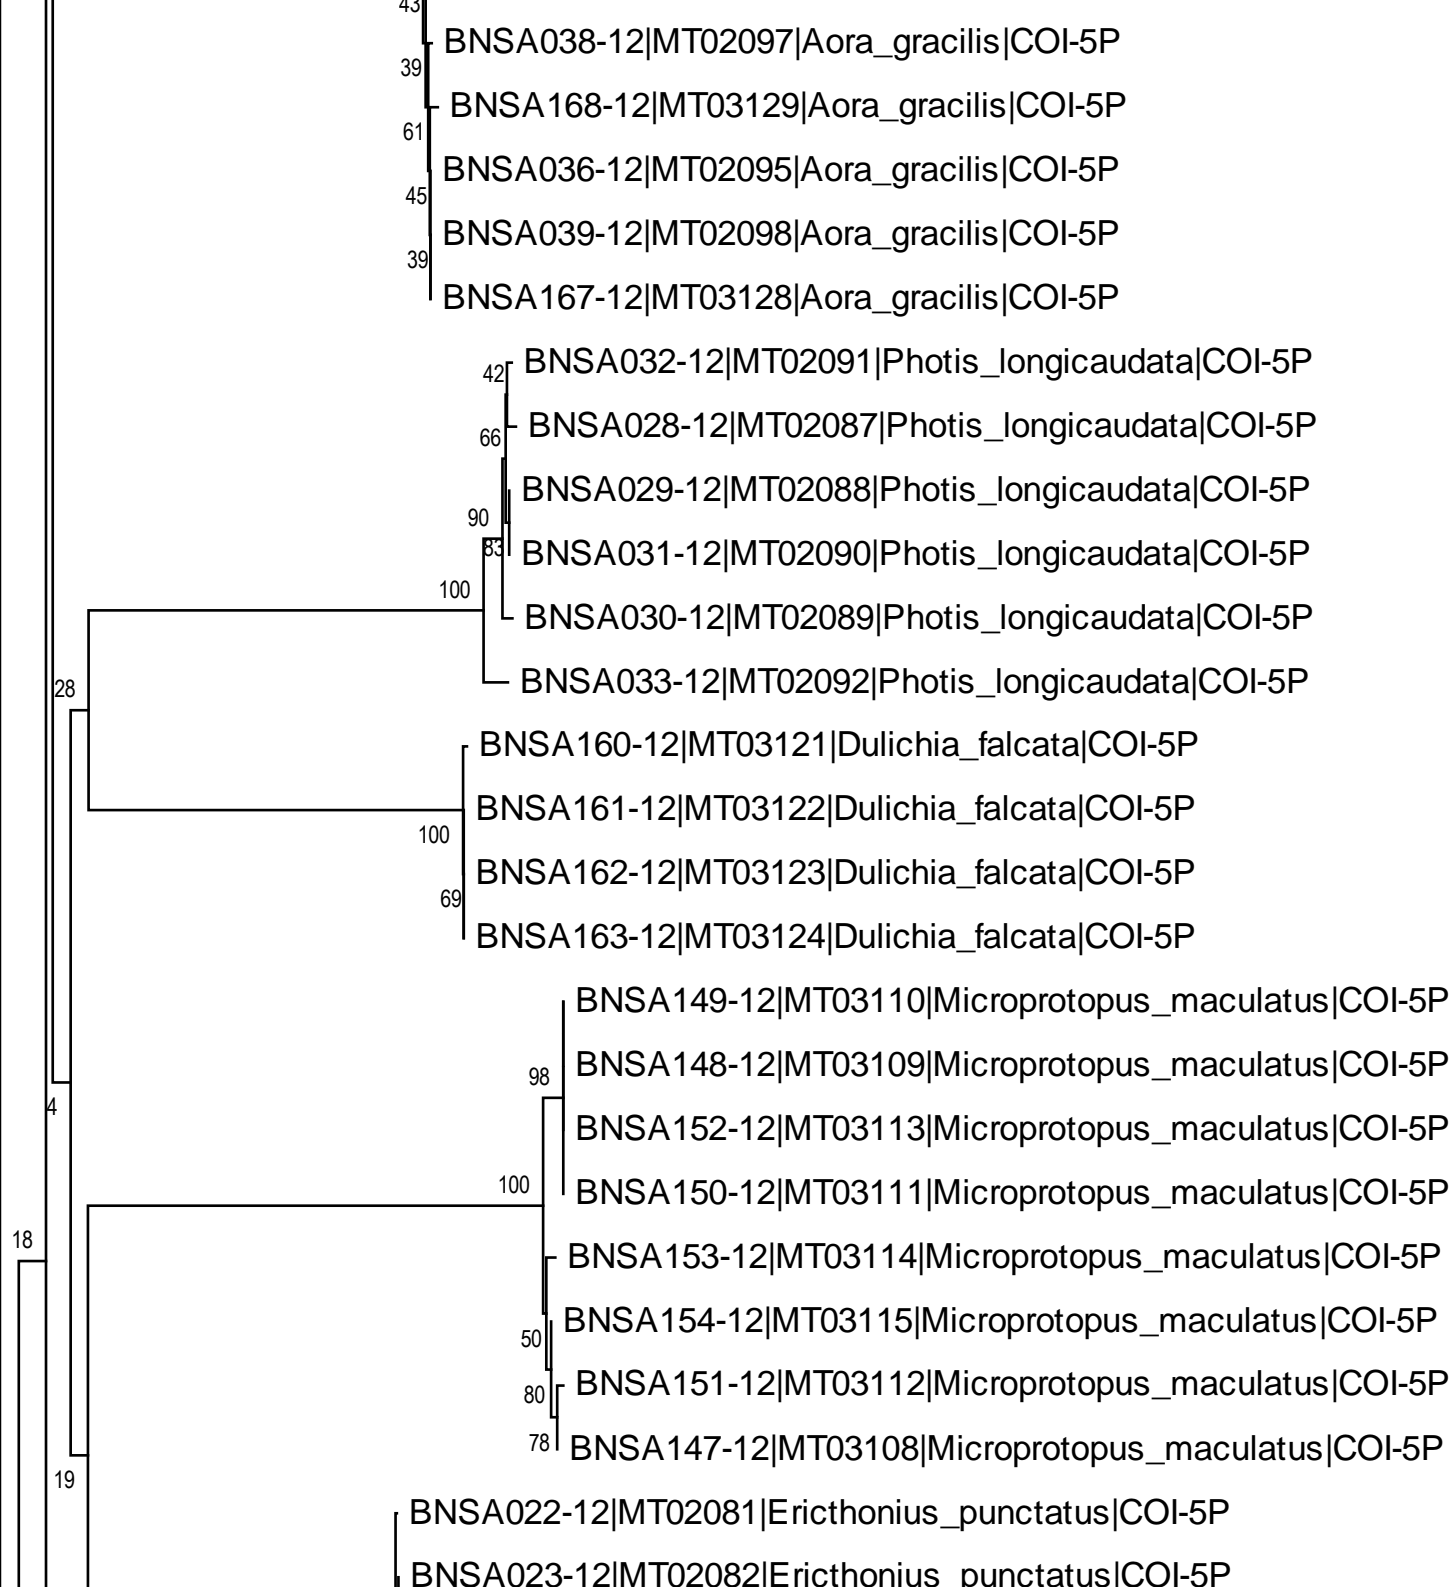

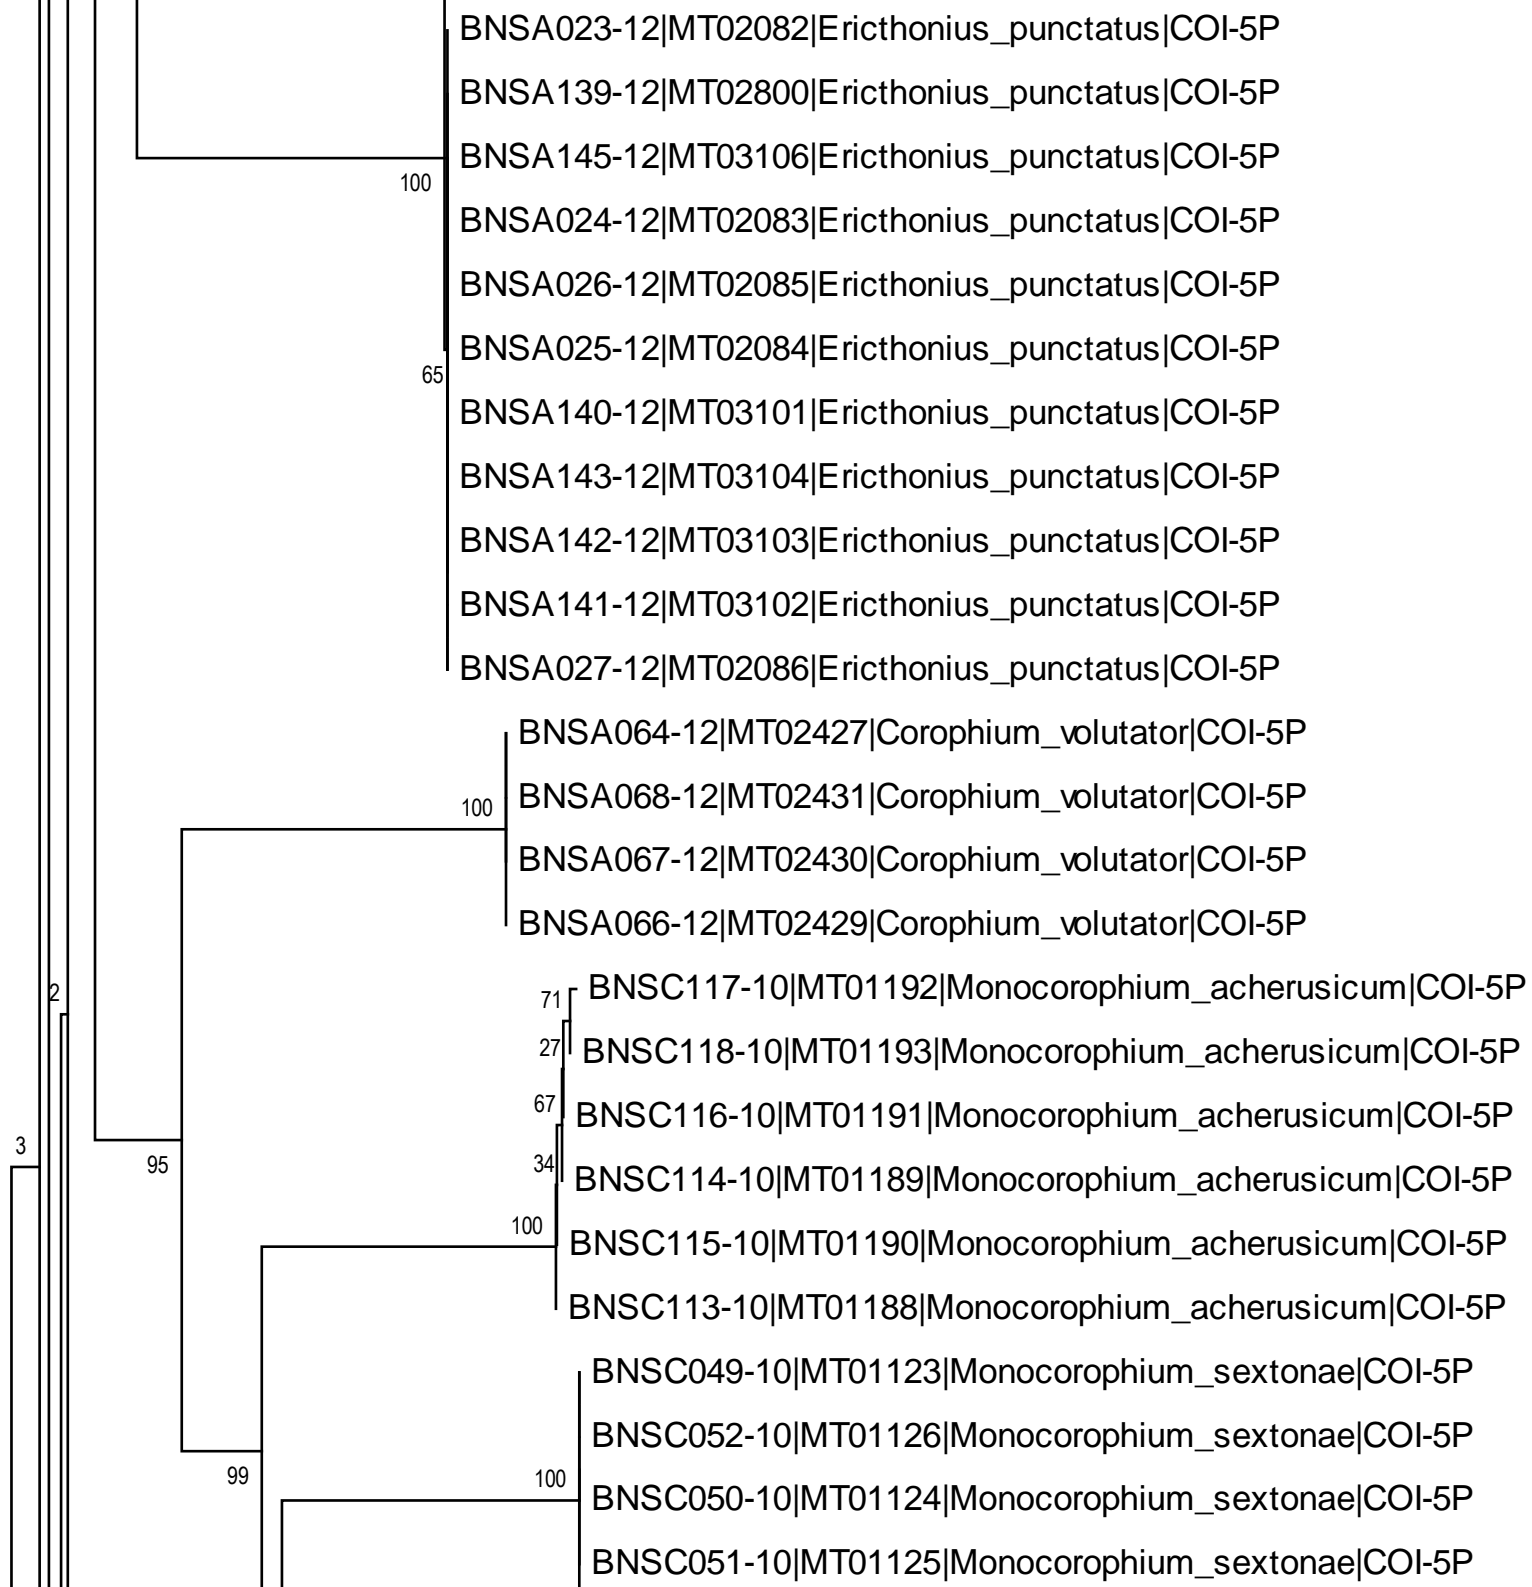

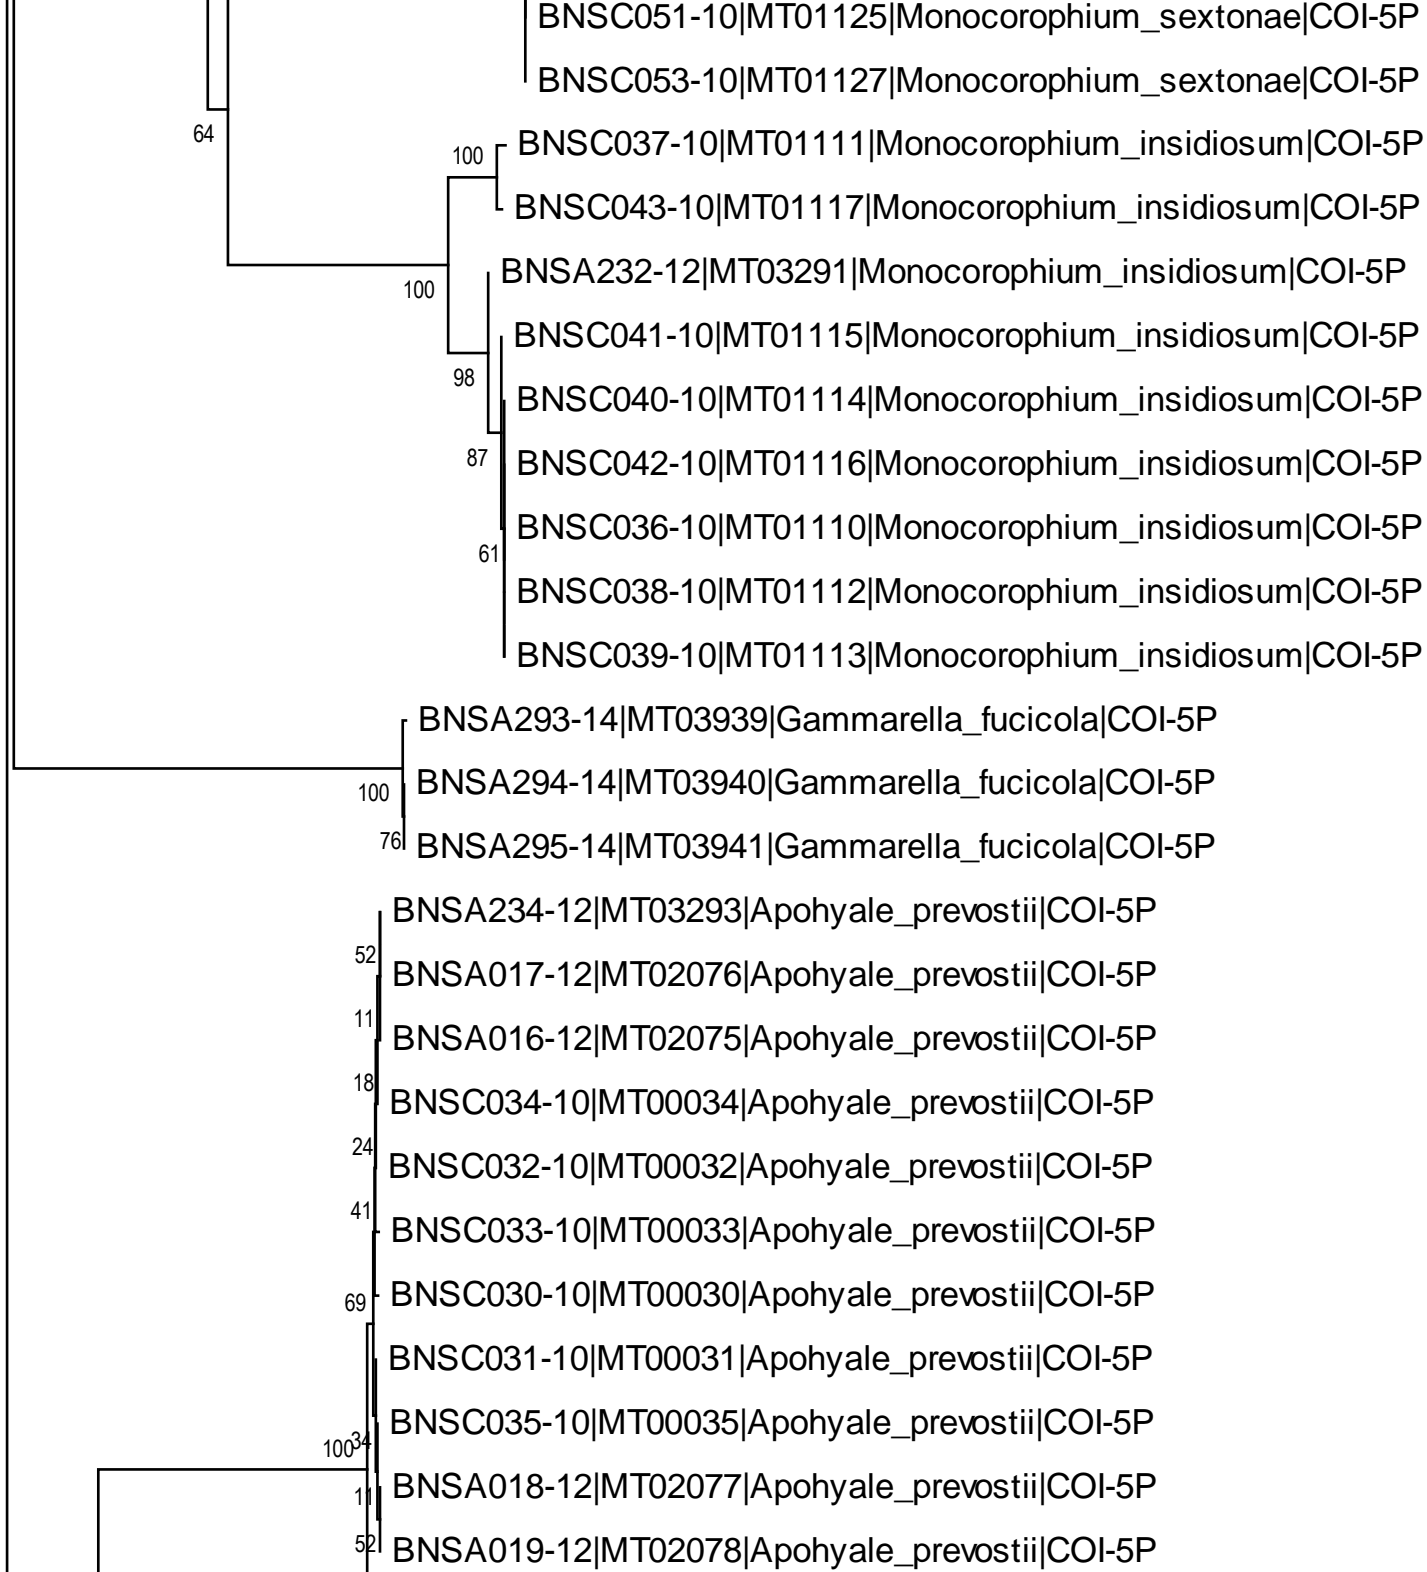

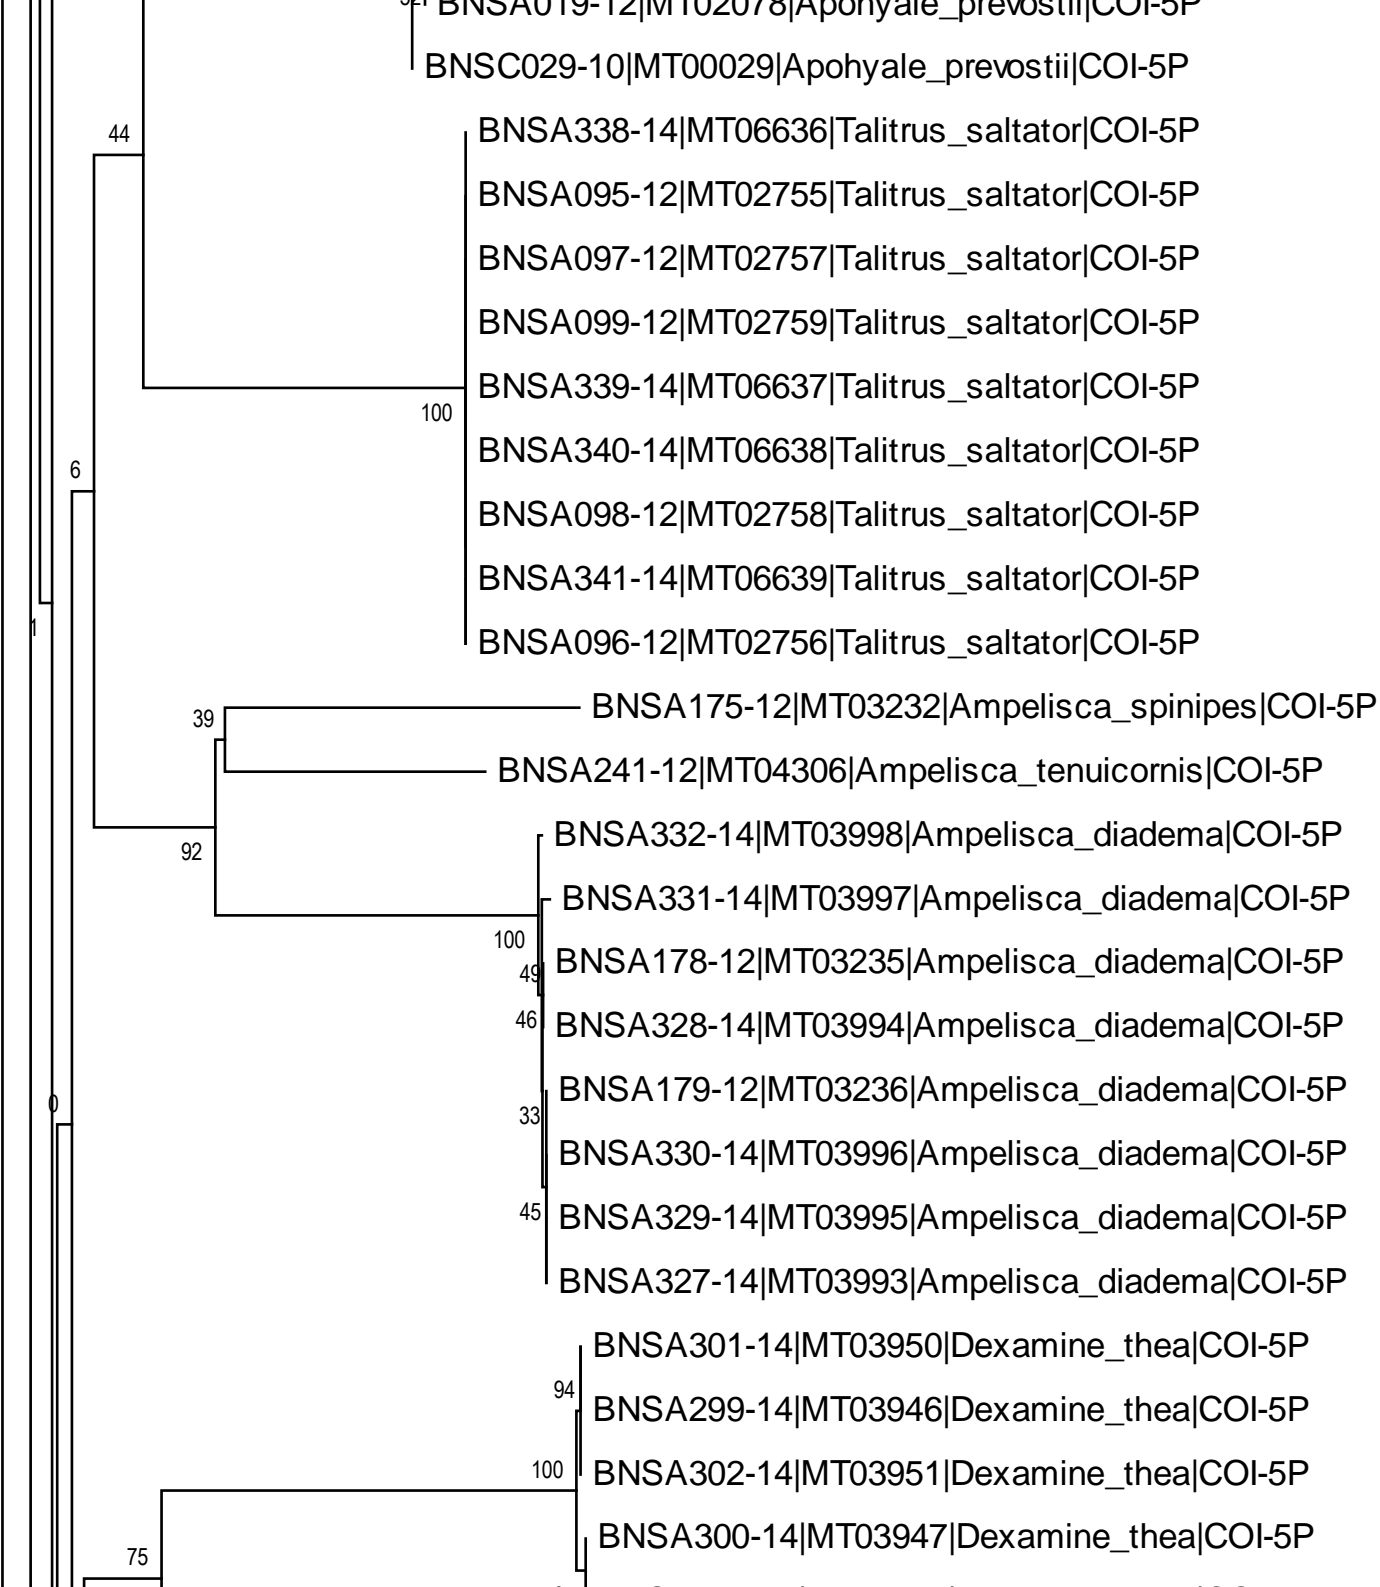



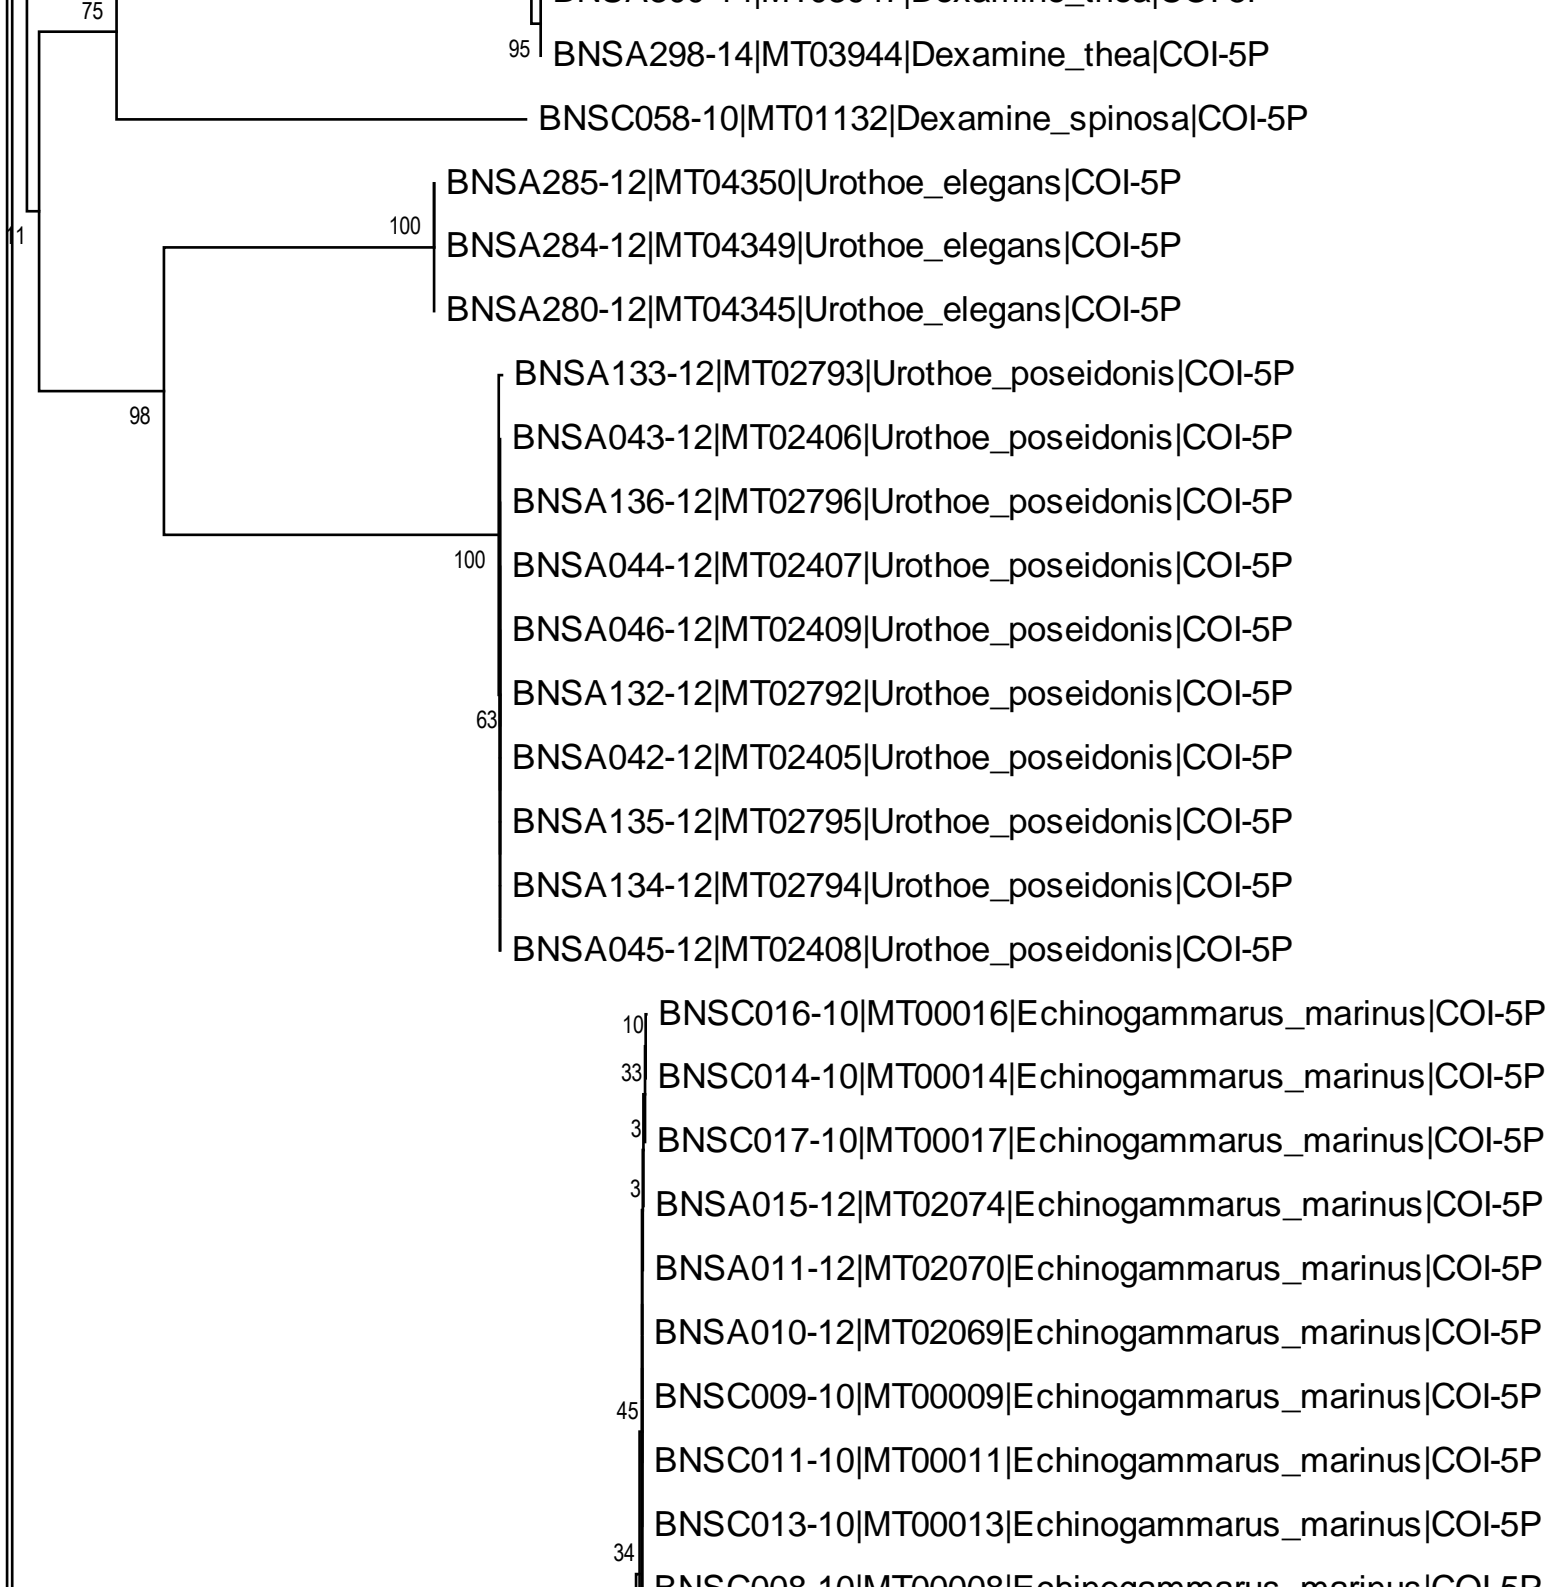

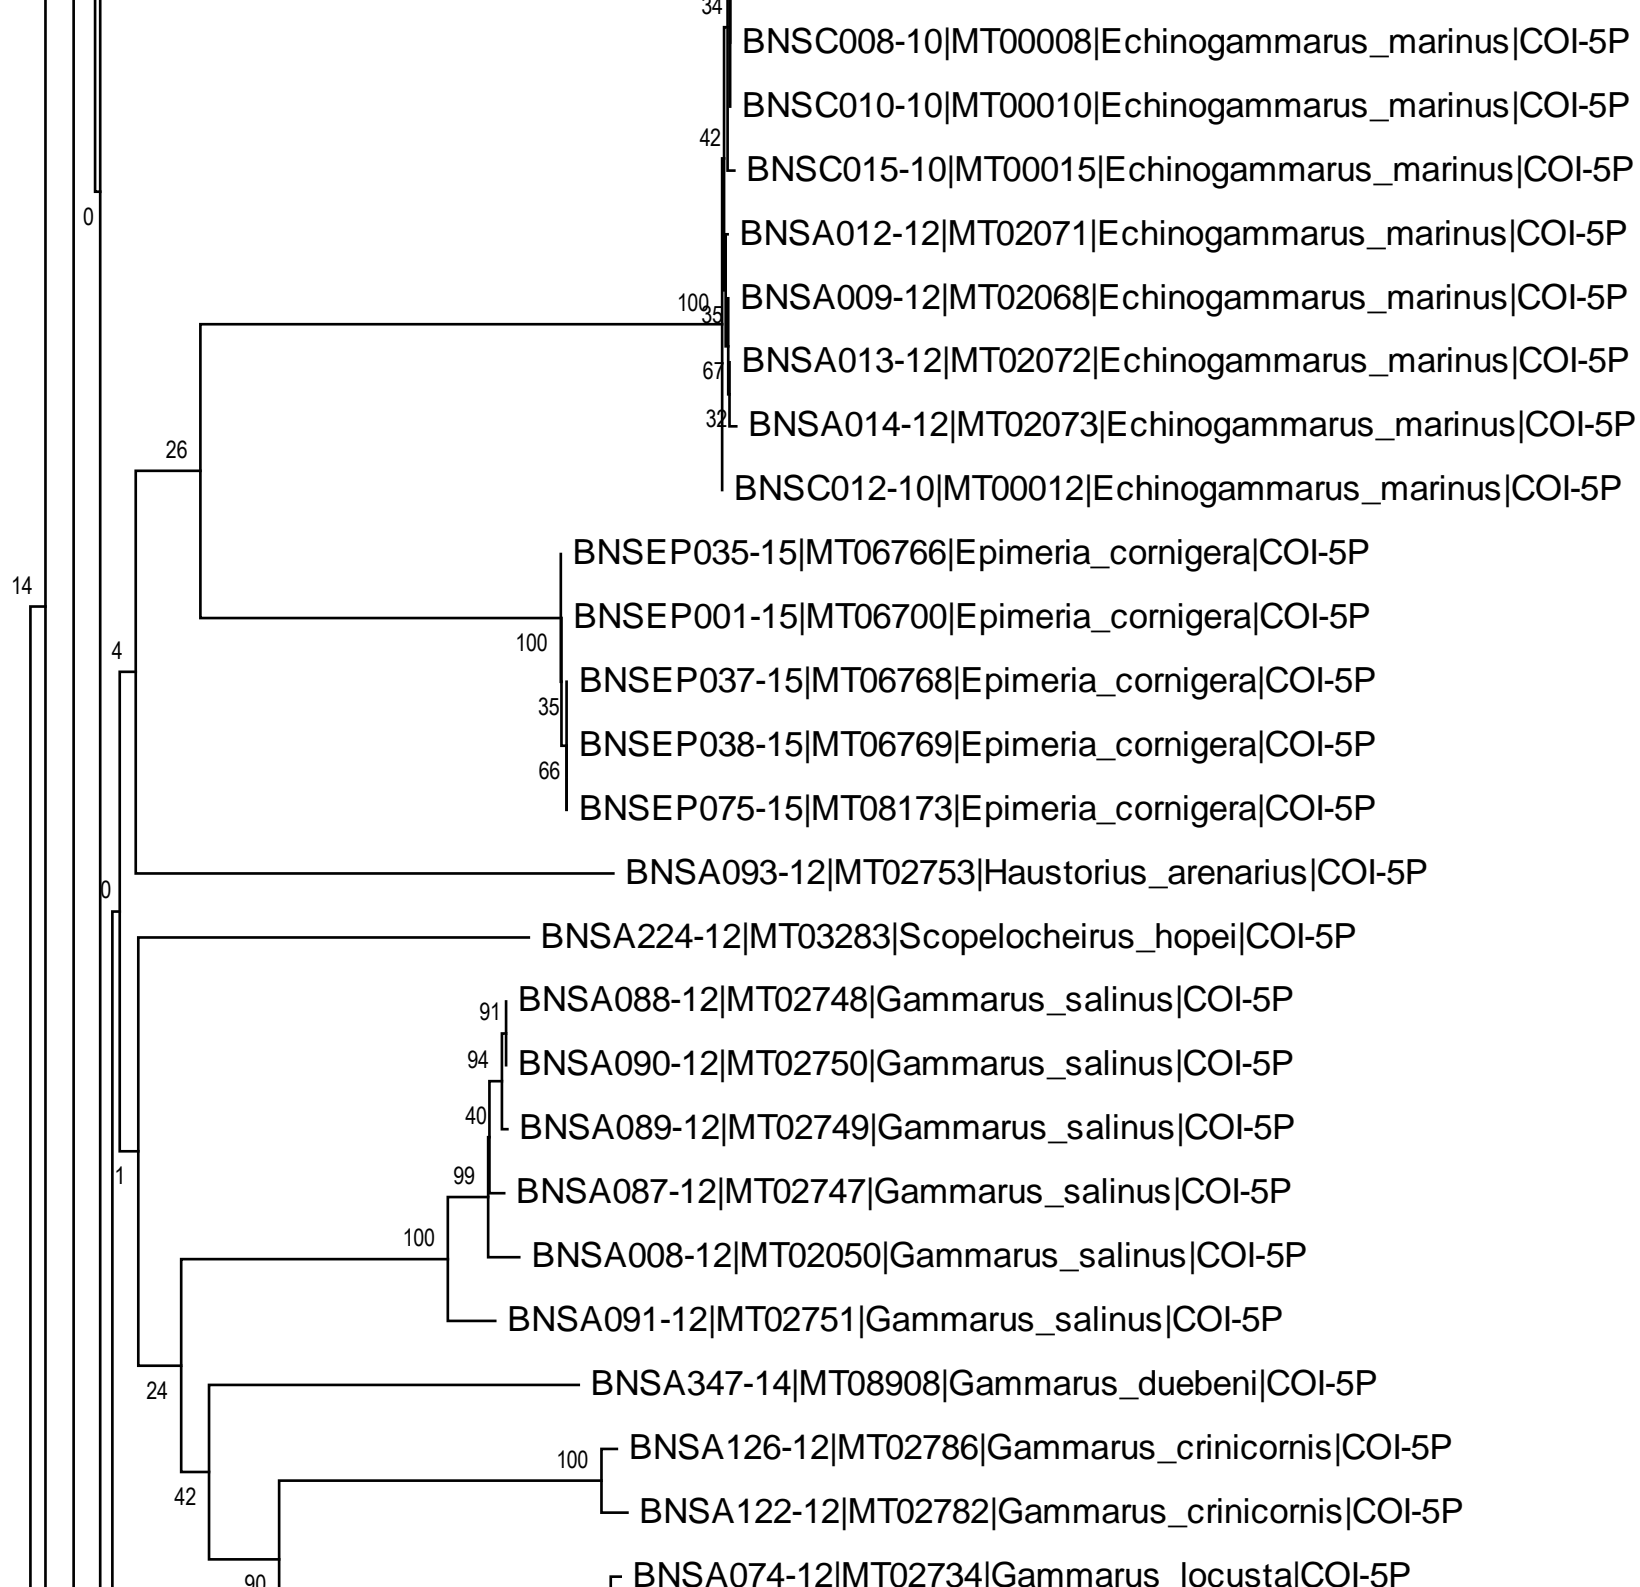

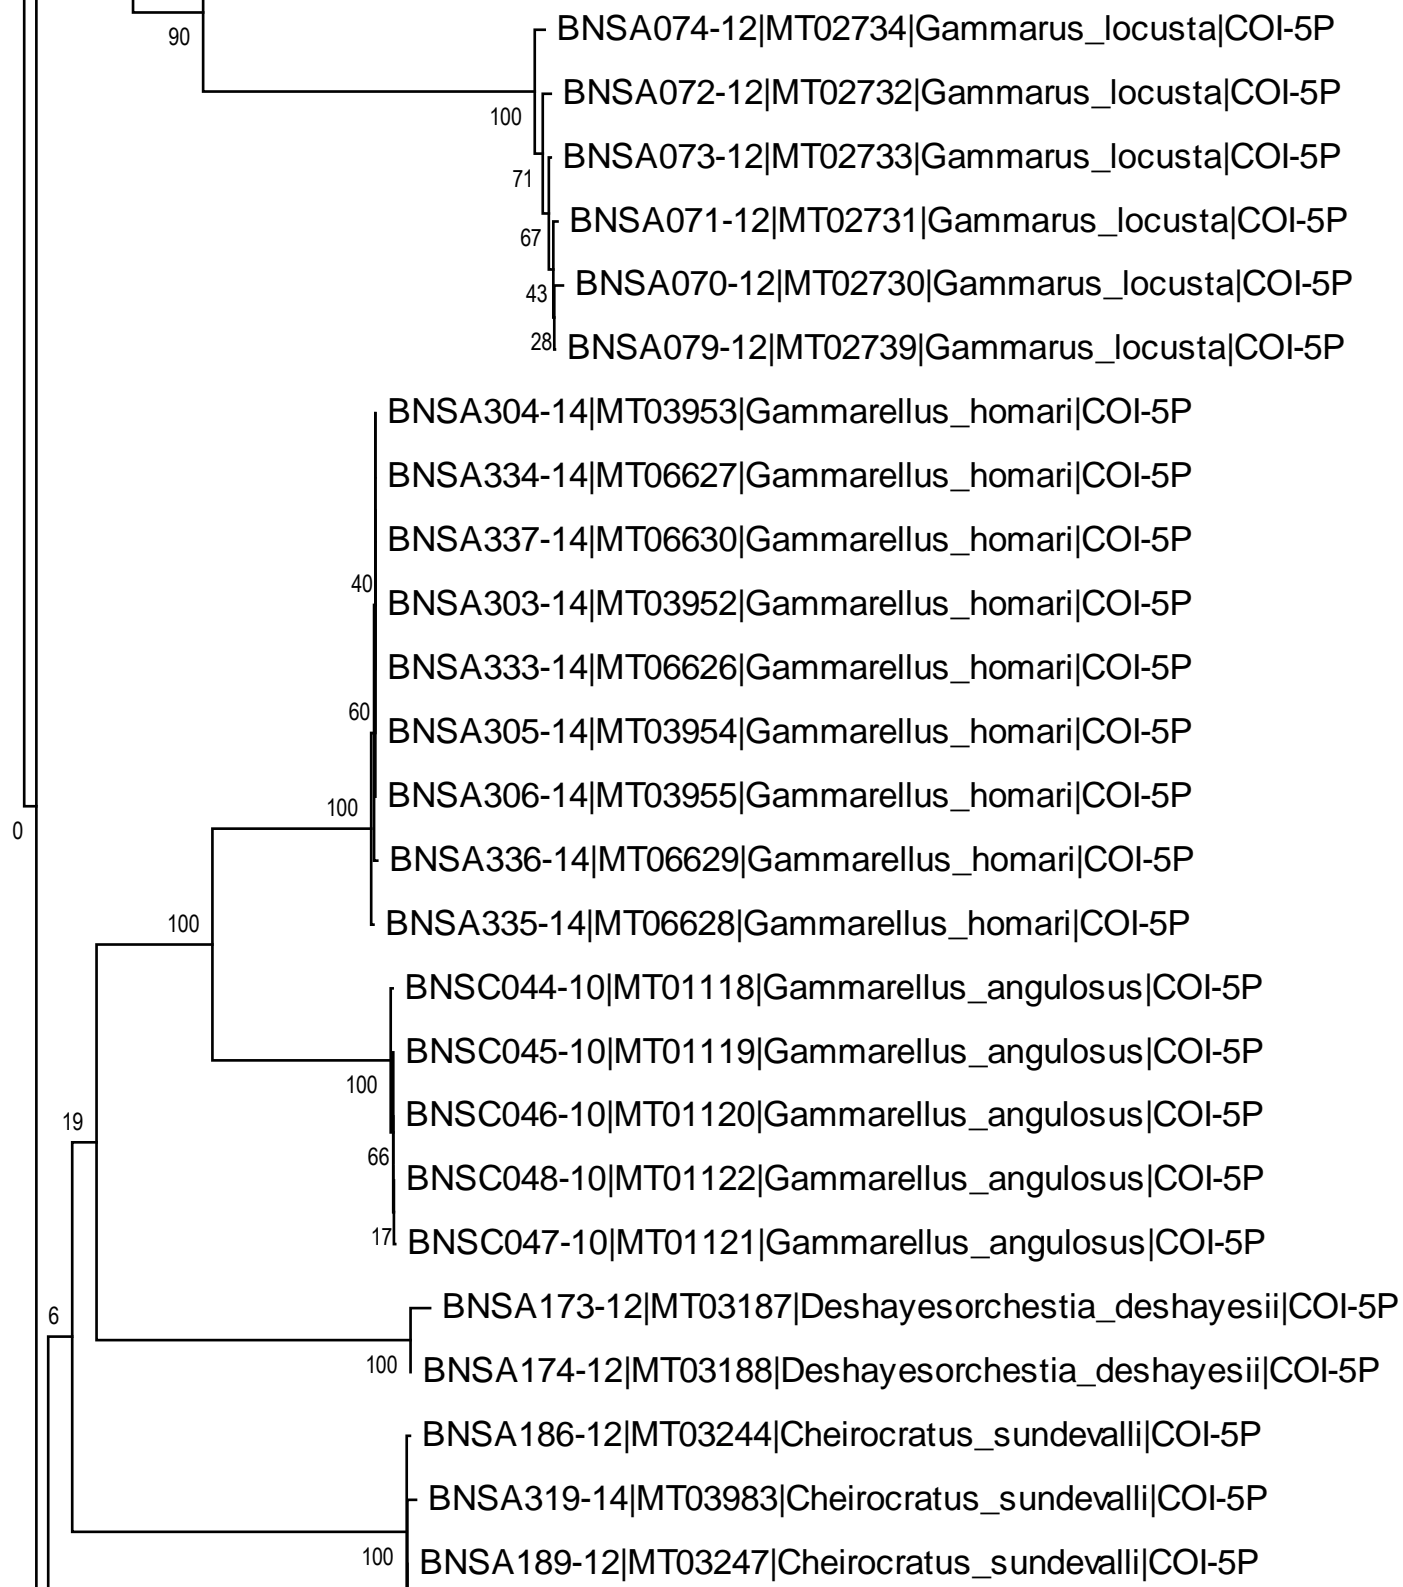

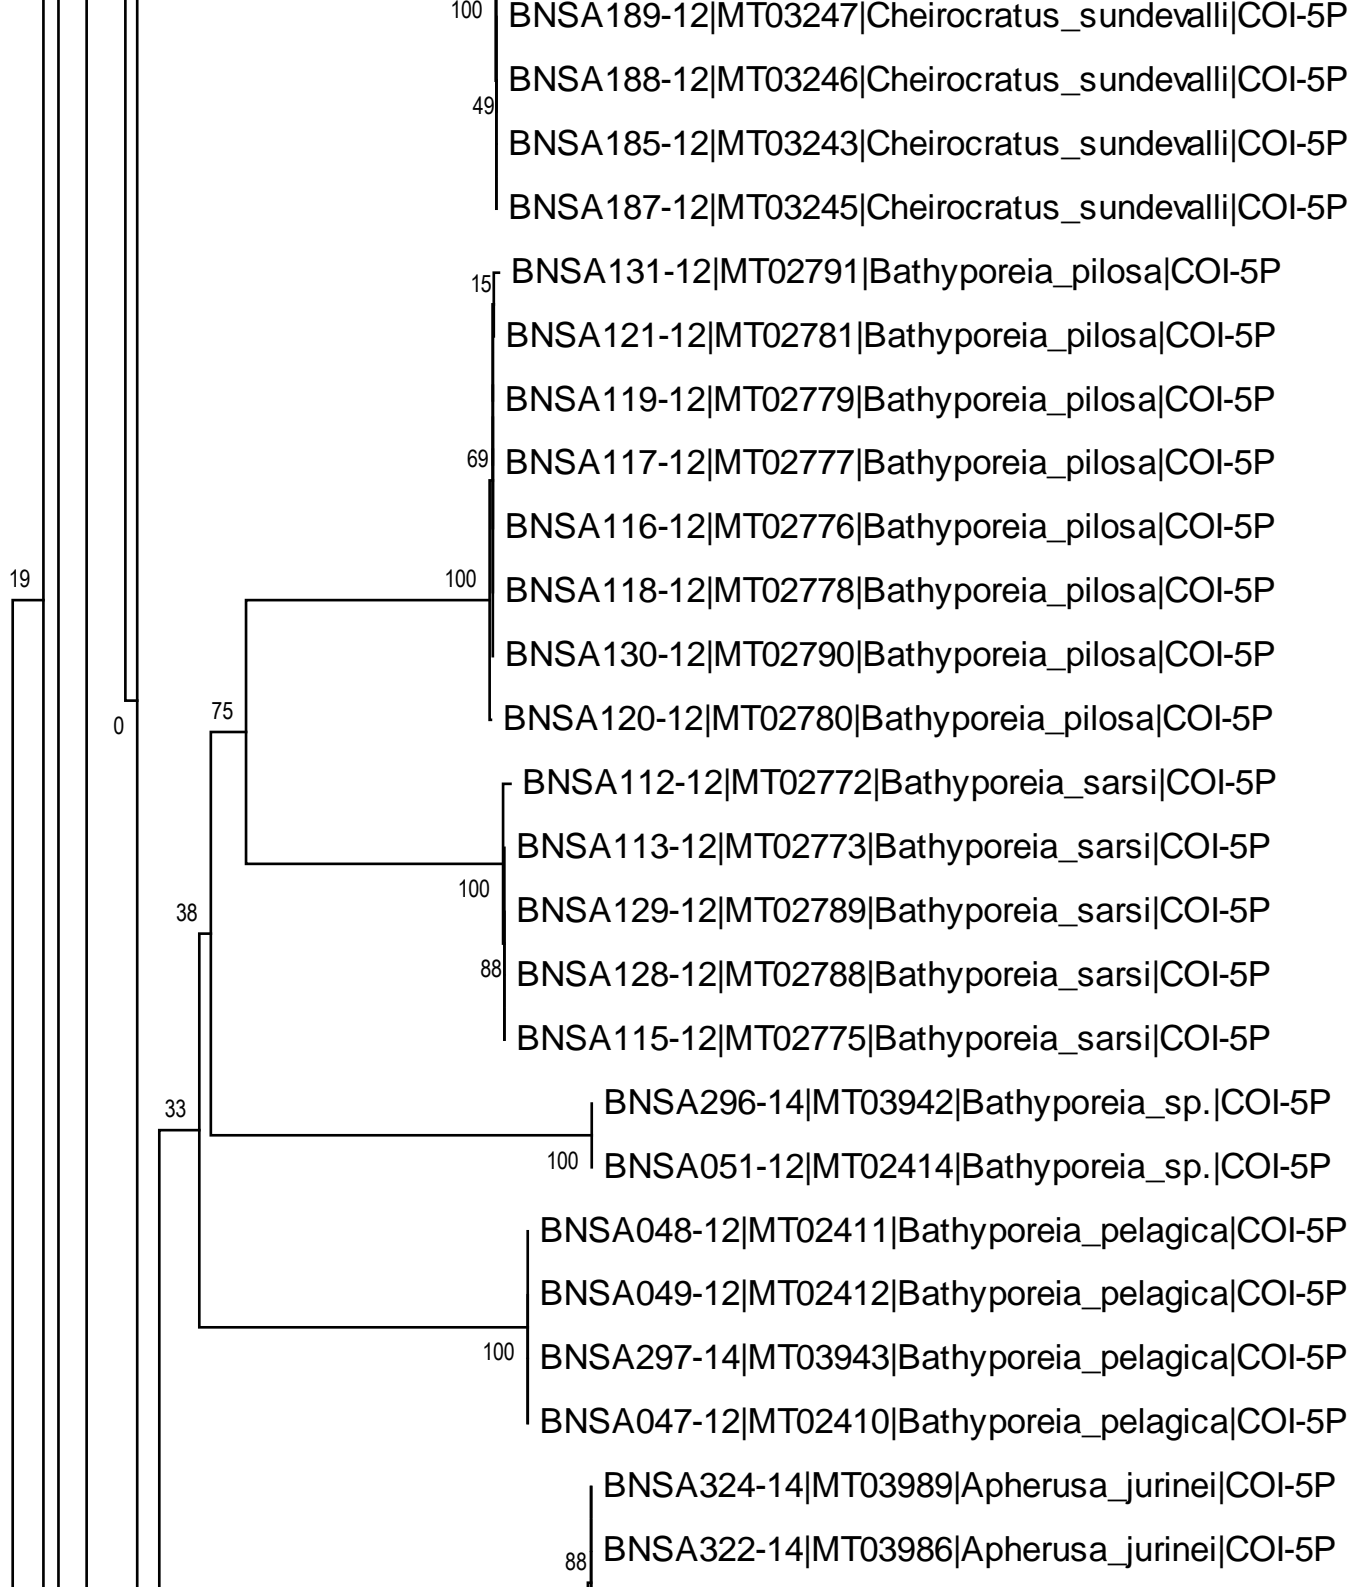

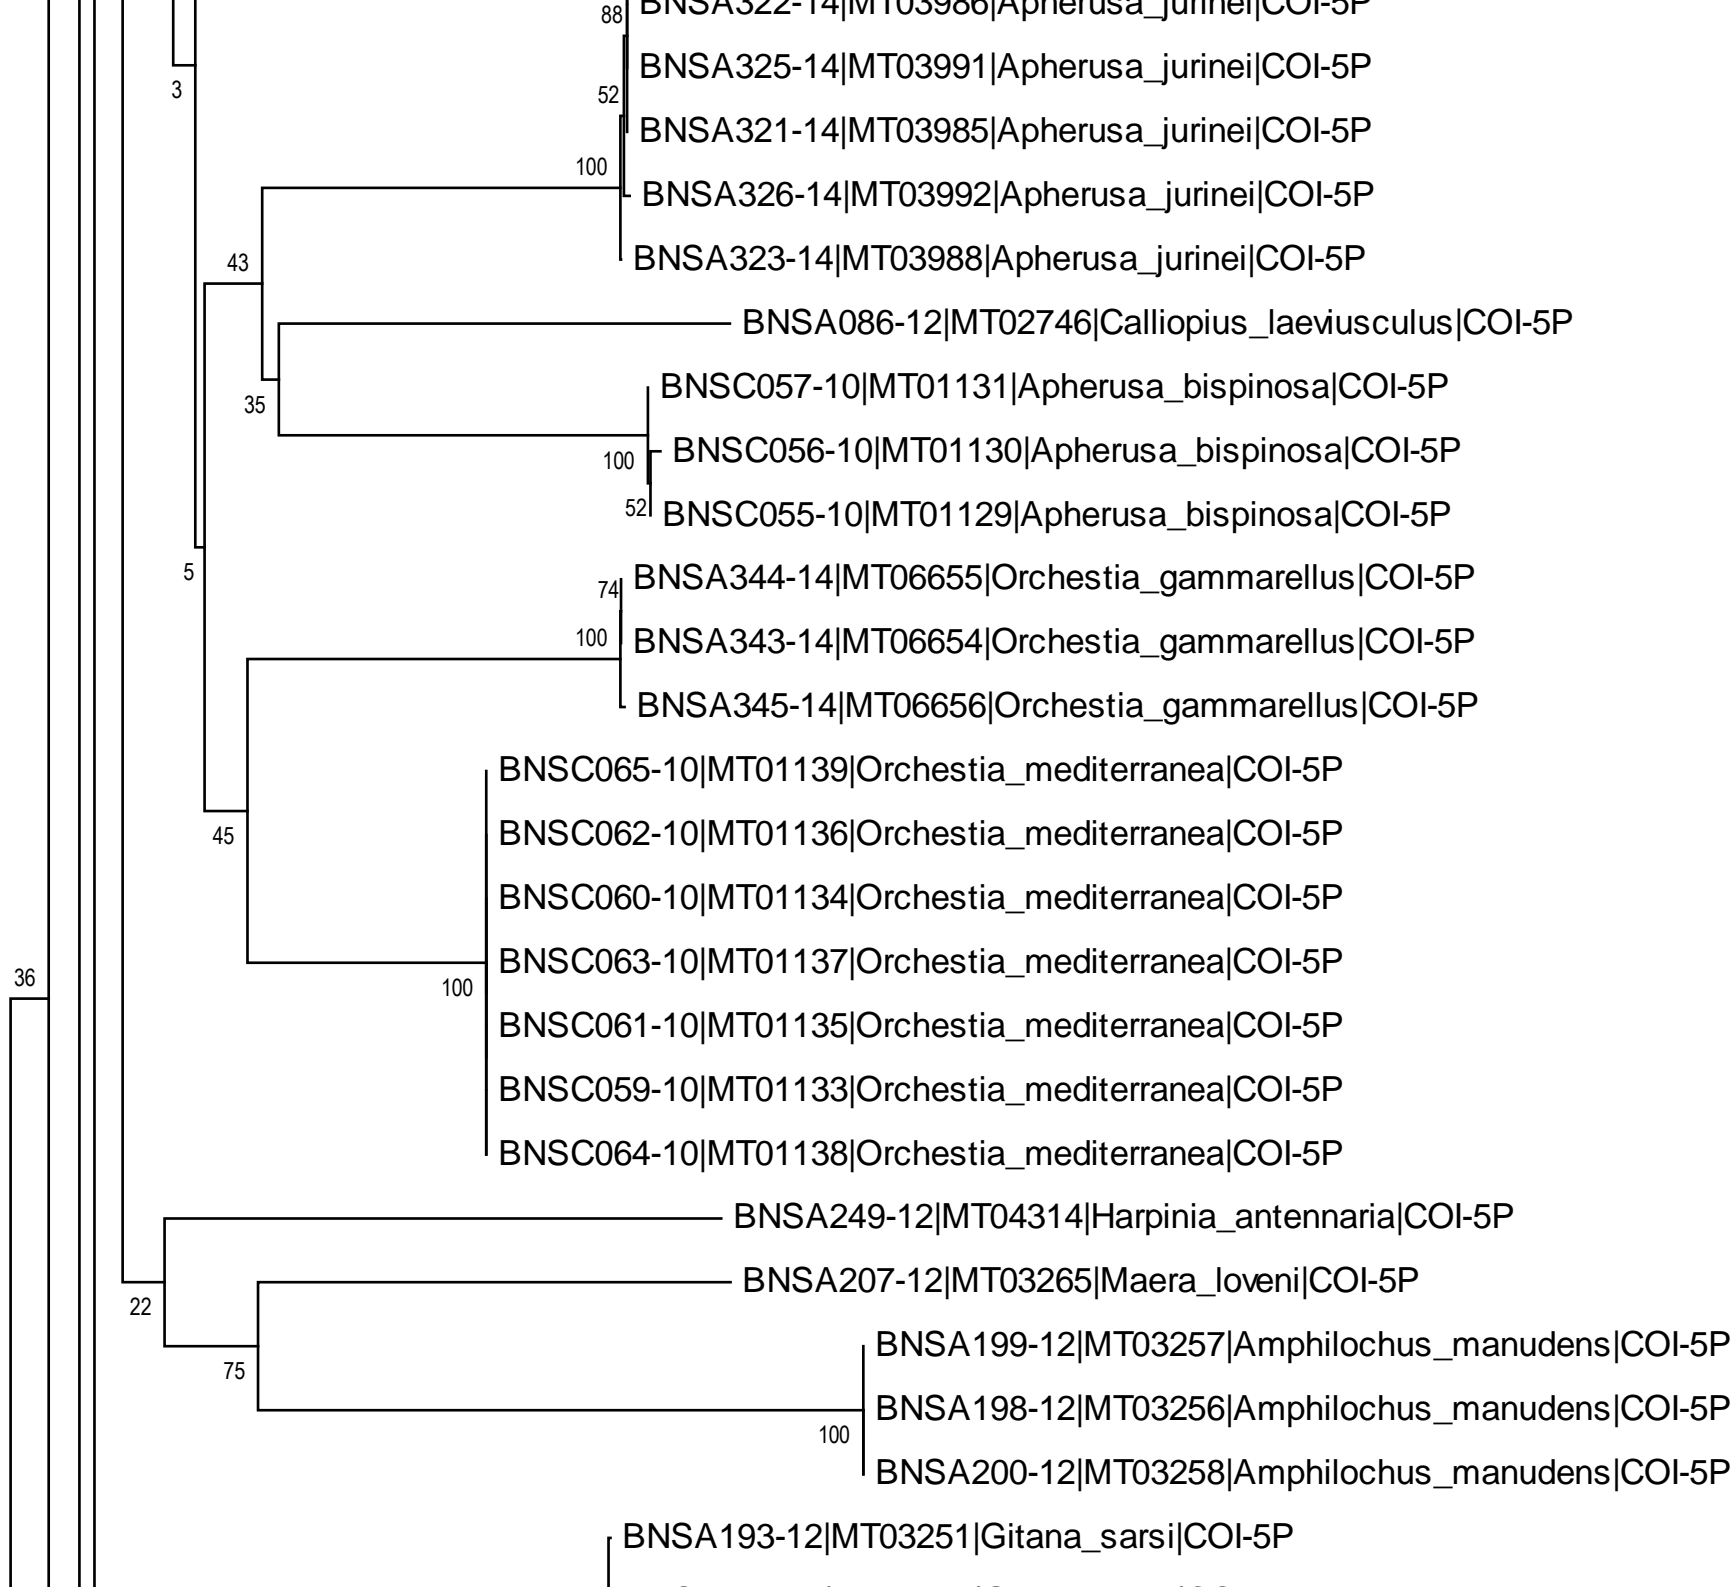

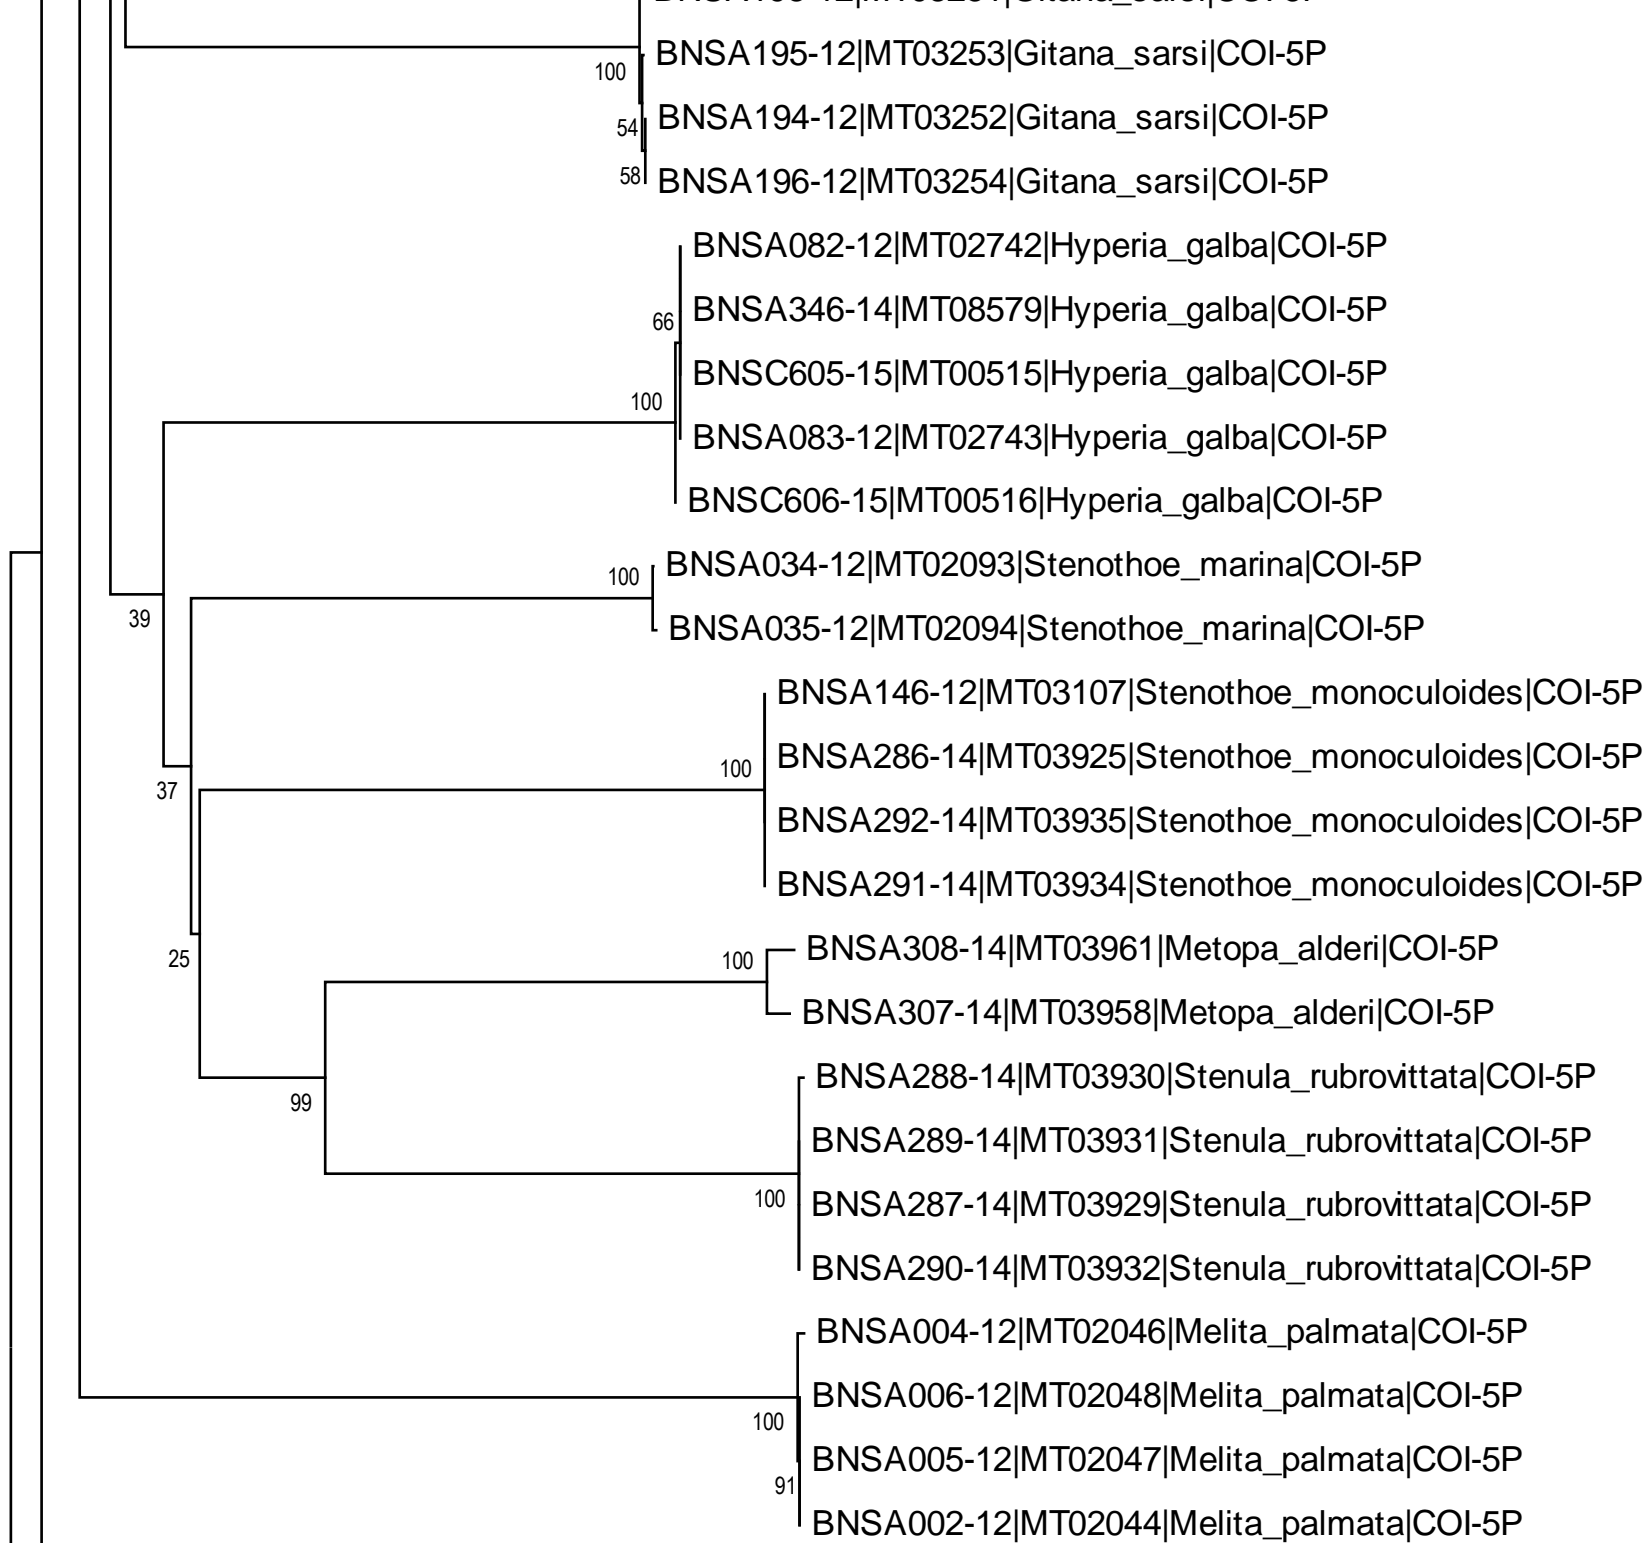

BNSA101-12|MT03249|*Crossa\_dubia*|COI-5P

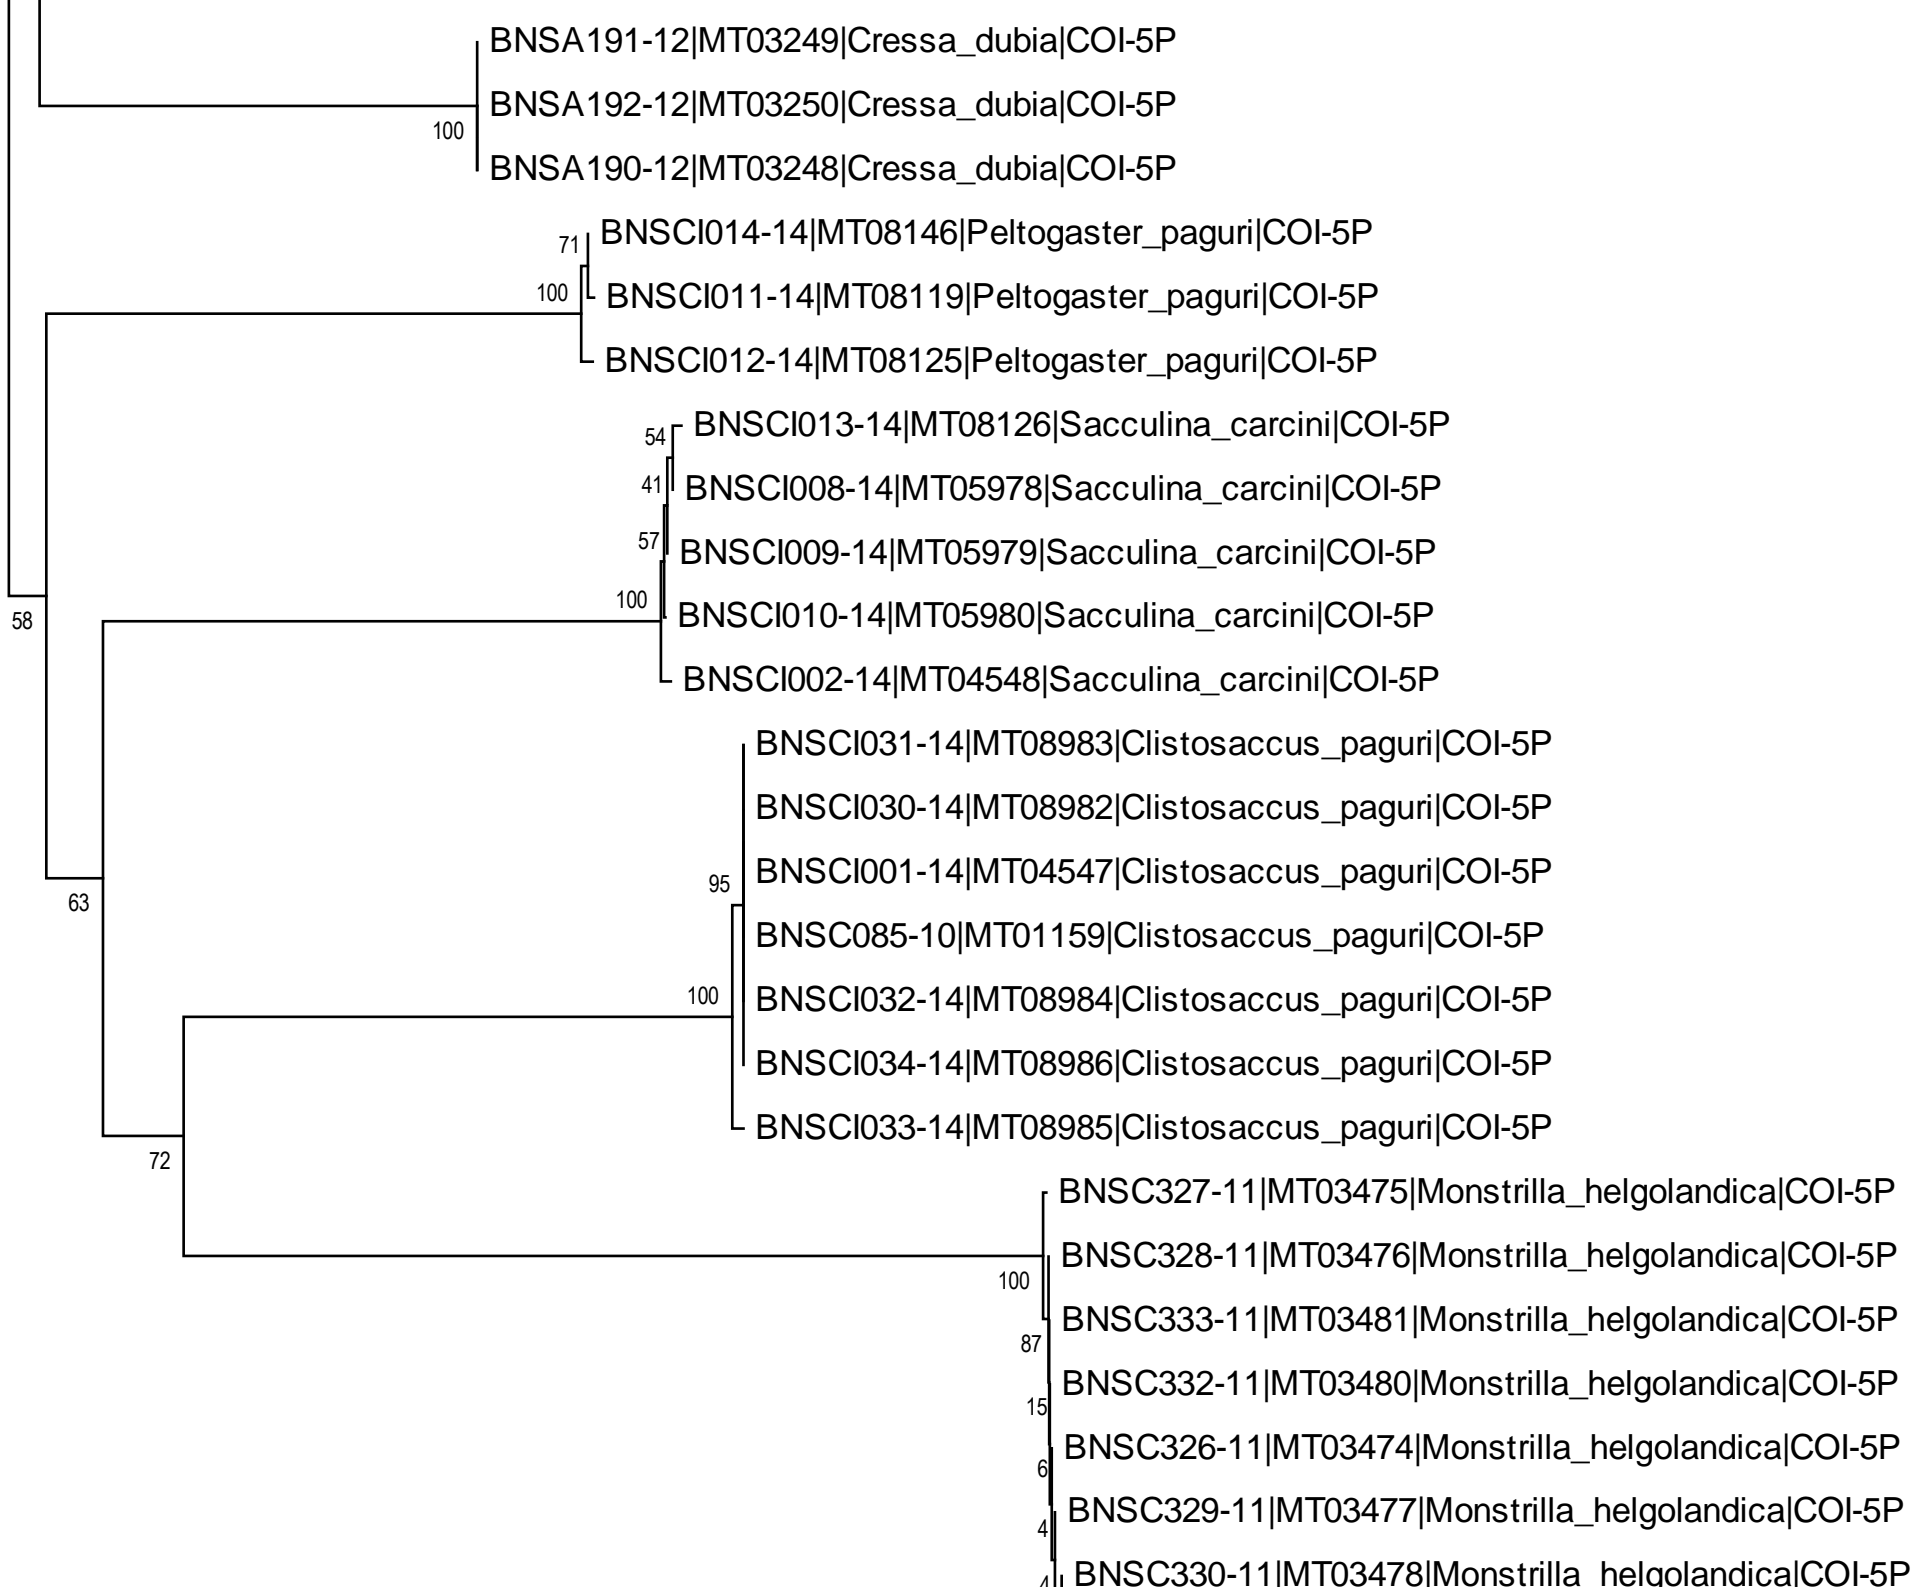

4 | BNSC330-11|MT03478|Monstrilla\_helgolandica|COI-5P

15 | BNSC335-11|MT03483|Monstrilla\_helgolandica|COI-5P

0.05
