# Supplementary material for: The Application of DNA Barcodes for the Identification of Marine Crustaceans from the North Sea and Adjacent Regions
Source: PubMed Central journal article supplement (PMC4587929; doi:10.1371/journal.pone.0139421), 2015-09-29
Supplement: pone.0139421.s003.pdf [file pone.0139421.s003.pdf]

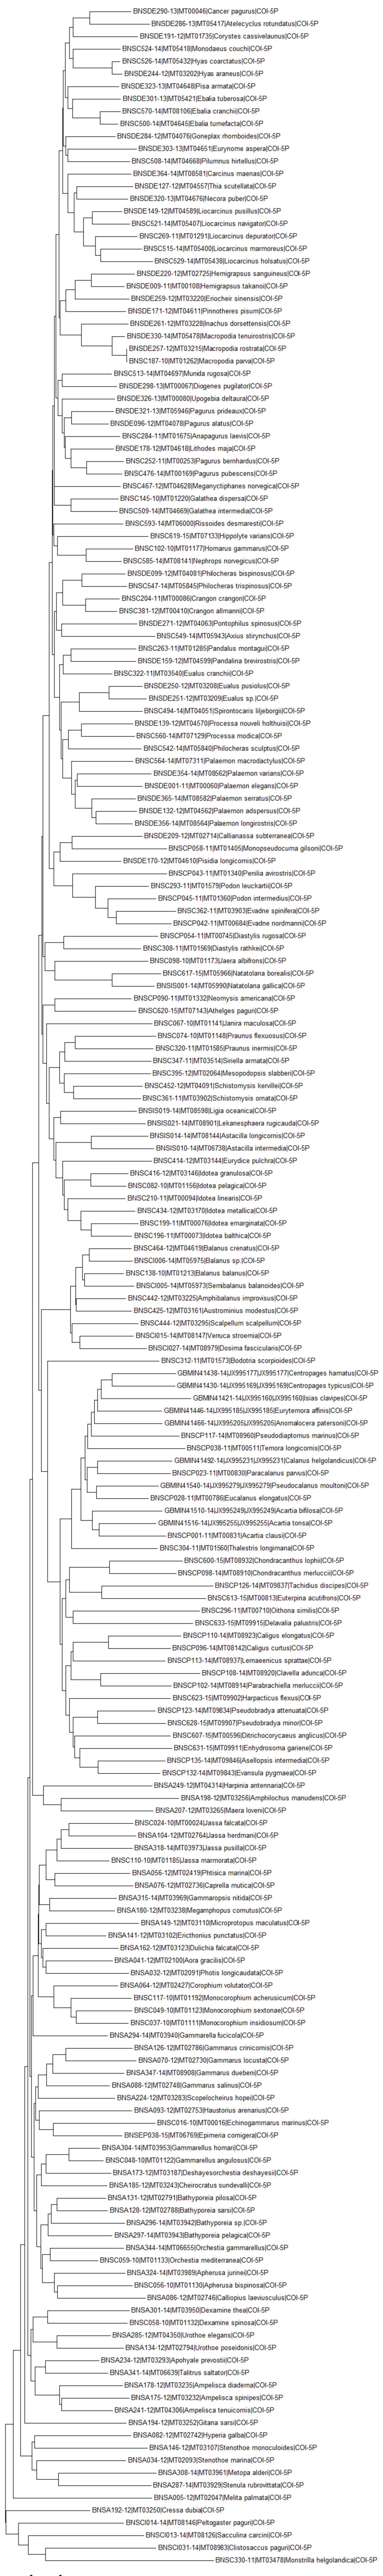

0.05
